# Supplementary material for: Characterisation of the Theileria orientalis Piroplasm Proteome across Three Common Genotypes
Source: MDPI journal article supplement (doi:10.3390/pathogens11101135), 2022-09-30
Supplement: s1 [file s1]

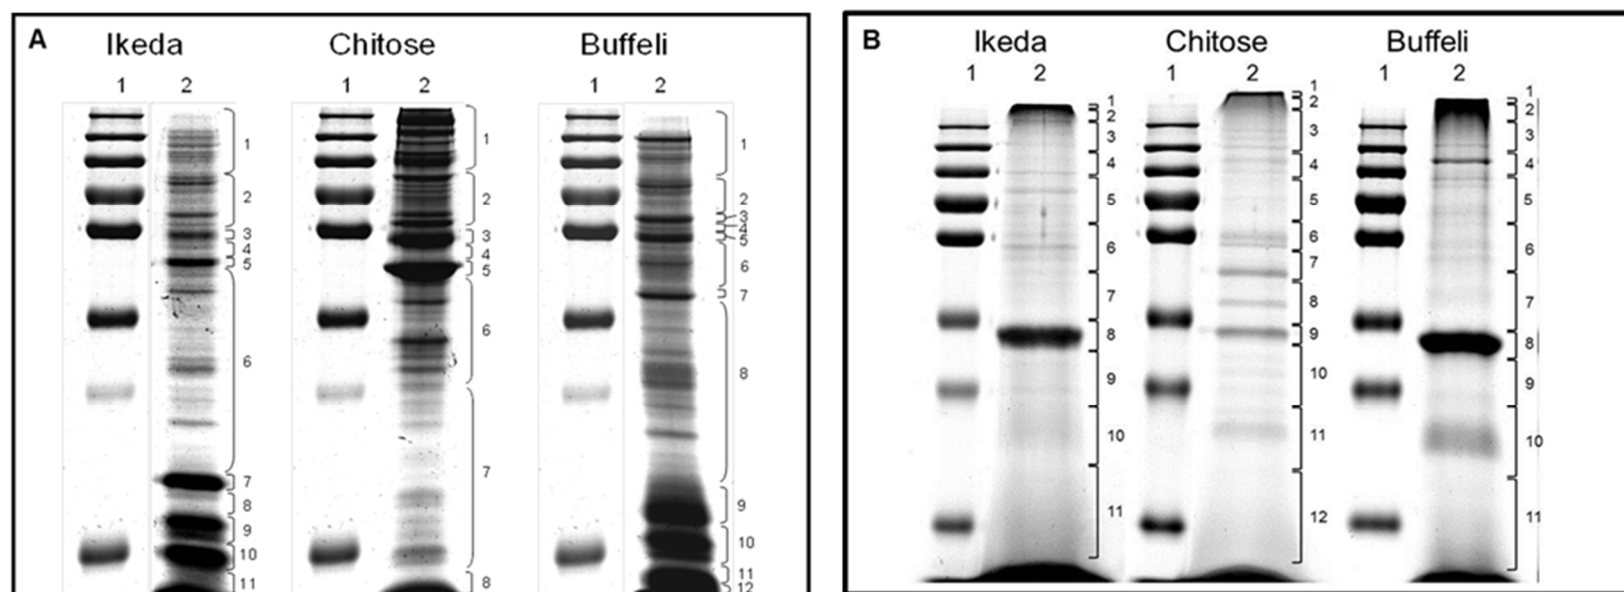

**Figure S1.** (A) Aqueous and (B) detergent phase protein fractions from TX-114 extractions of *T. orientalis* Ikeda, Chitose and Buffeli piroplasms were electrophoresed on a 12% Tris-glycine one-dimensional SDS polyacrylamide gel. Lane 1 – PageRuler™ Prestained protein ladder (ThermoFisher Scientific); Lane 2 – *T. orientalis* protein sample. Bands from each protein sample were excised into 8-12 gel slices as indicated on the righthand side of the lane prior to processing for LC-MS/MS.

|                      | 450 | 460 |   |   |   |   |   |   |   |   |   |   |   |   |   |   | 470 |   |   |   |   |   |   |   |   |   | 480 |   |   |   |   |   |   |  |  |  |
|----------------------|-----|-----|---|---|---|---|---|---|---|---|---|---|---|---|---|---|-----|---|---|---|---|---|---|---|---|---|-----|---|---|---|---|---|---|--|--|--|
| T.orientalis ATP-PFK | V   | K   | T | V | T | E | L | E | L | D | G | L | I | I | V | G | G   | D | G | S | N | S | N | A | A | N | I   | S | N | Y | L | A | P |  |  |  |
| T.annulata ATP-PFK   | L   | K   | T | V | T | E | L | E | L | D | G | L | I | I | V | G | G   | D | G | S | N | S | N | A | A | N | I   | S | N | Y | L | A | Q |  |  |  |
| T.parva ATP-PFK      | L   | K   | T | V | T | E | L | E | L | D | G | L | I | I | V | G | G   | D | G | S | N | S | N | A | A | N | I   | A | N | Y | L | A | Q |  |  |  |
| T.gondii PPI-PFK     | L   | E   | I | C | E | K | L | Q | L | N | G | L | V | V | I | G | G   | D | D | S | N | T | N | A | A | I | L   | A | E | Y | F | K | S |  |  |  |
| C.parvum PPI-PFK     | L   | E   | I | C | E | K | L | K | L | H | G | L | V | V | I | G | G   | D | D | S | N | T | N | A | A | V | L   | A | E | Y | F | K | R |  |  |  |

**Figure S2.** Alignment of phosphofructokinase sequences from representative apicomplexans showing the substrate-binding motif GGDG/D (boxed) which is associated with use of ATP or PPi for activity. *T. orientalis* PFK is predicted to be ATP-dependent.

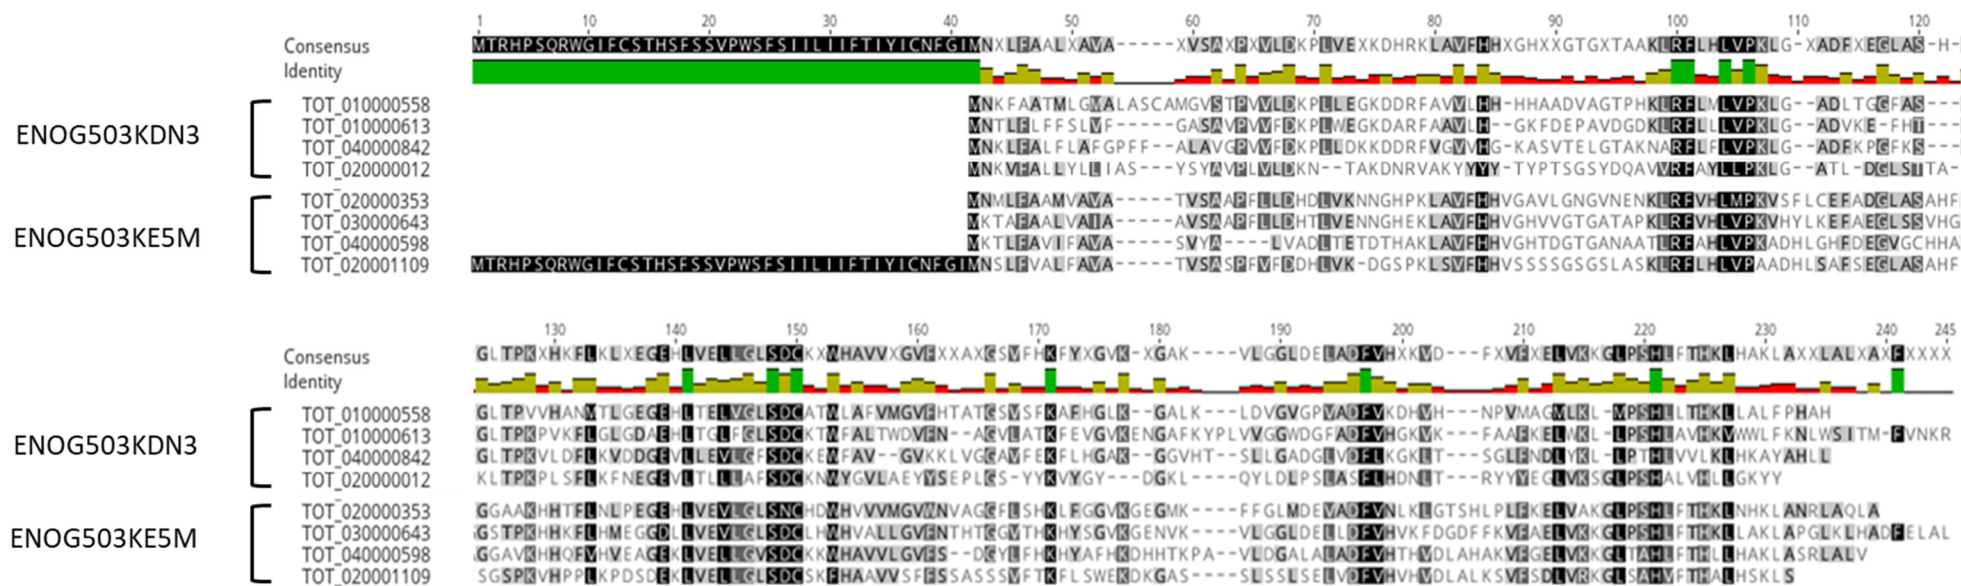

**Figure S3.** Alignment of uncharacterised aqueous phase proteins found to be highly abundant in the *T. orientalis* Ikeda piroplasm phase. These proteins are all orthologs and cluster into two phylogenetic groups according to EggNOG (ENOG503KDN3 and ENOG503KE5M).
