# Supplementary material for: Characterisation of the Theileria orientalis Piroplasm Proteome across Three Common Genotypes
Source: Pathogens. 2022 Sep 30;11(10):1135. doi: 10.3390/pathogens11101135 (PMC9610513; doi:10.3390/pathogens11101135)
Supplement: Supplementary file 1 [file pathogens-11-01135-s001.zip]

Archive with 4 entries (4 files):
- Figures.pdf
- Table S1.xlsx
- Table S2.xlsx
- Table S3.xlsx
