# Supplementary material for: Characterisation of the Theileria orientalis Piroplasm Proteome across Three Common Genotypes
Source: Pathogens. 2022 Sep 30;11(10):1135. doi: 10.3390/pathogens11101135 (PMC9610513; doi:10.3390/pathogens11101135)
Supplement: Supplementary file 1 [file pathogens-11-01135-s001.zip › Table S1.xlsx]

## Sheet: Sheet1
Supplementary table 1. Number of T. orientalis proteins identified by functional group
	No. proteins identified
Function	T. orientalis Ikeda	T. orientalis Chitose	T. orientalis Buffeli	All genotypes
Metabolism	50	21		115
DNA replication and repair	5	1	10	16
Cell division	2	2	3	7
Transcription, regulation and signalling	40	10	26	76
Translation	67	15	75	157
Protein processing and turnover	37	18	63	118
Cellular organisation and transport	29	33	35	97
Homeostasis	3	1	11	15
Host cell attachment and interaction	7	8	8	23
Uncharacterised	163	107	167	437
