# Supplementary material for: Characterisation of the Theileria orientalis Piroplasm Proteome across Three Common Genotypes
Source: Pathogens. 2022 Sep 30;11(10):1135. doi: 10.3390/pathogens11101135 (PMC9610513; doi:10.3390/pathogens11101135)
Supplement: Supplementary file 1 [file pathogens-11-01135-s001.zip › Table S2.xlsx]

## Sheet: Sheet1
Ikeda detergent
Accession	Score	Mass	Num. of matches	No of signif matches	No of seqs	No of signif seqs	emPAI	Description	Comments
I7MIW5	37	94811	4	1	2	1	0.03	tr|I7MIW5|TTHERM_00518740 I7MIW5_TETTS Bardet-biedl syndrome protein, putative n=3 Tax_Id=312017 [Tetrahymena thermophila (strain SB210)]	Cell division
Q4N3T5	71	41985	6	3	6	3	0.25	tr|Q4N3T5|TP02_0903 Q4N3T5_THEPA Actin, putative n=4 Tax_Id=5875 [Theileria parva]	Cell division
A0A086JQA2	42	40609	1	1	1	1	0.08	tr|A0A086JQA2|TGP89_243910 A0A086JQA2_TOXGO Cof family hydrolase subfamily protein n=2 Tax_Id=943119 [Toxoplasma gondii p89]	DNA replication and repair
L1LCL2	63	76132	1	1	1	1	0.04	tr|L1LCL2|BEWA_015800 L1LCL2_BABEQ DNA replication licensing factor MCM7, putative n=3 Tax_Id=1537102 [Babesia equi strain WA]	DNA replication and repair
21429688	38	43631	4	1	3	1	0.08	gi|21429688|gb|AAM50064.1| alpha-tubulin Tax_Id=6026 [Opisthonecta henneguyi]	Cellular organisation and transport
A0A077ZWA3	51	182979	9	2	1	1	0.02	tr|A0A077ZWA3|Contig10769.g11525 A0A077ZWA3_STYLE Tubulin-tyrosine ligase family n=2 Tax_Id=5949 [Stylonychia lemnae]	Cellular organisation and transport
J4C8B6	59	24909	2	1	2	1	0.13	tr|J4C8B6|TOT_020001088 J4C8B6_THEOR Small GTP binding protein rab6 n=4 Tax_Id=869250 [Theileria orientalis strain Shintoku]	Cellular organisation and transport
J4CDM5	69	52582	1	1	1	1	0.06	tr|J4CDM5|TOT_030000664 J4CDM5_THEOR Band 7-related protein n=4 Tax_Id=869250 [Theileria orientalis strain Shintoku]	Cellular organisation and transport
J4D779	85	23060	1	1	1	1	0.14	tr|J4D779|TOT_020000282 J4D779_THEOR Cg8 protein n=4 Tax_Id=869250 [Theileria orientalis strain Shintoku]	Cellular organisation and transport
J4DA94	121	52976	8	8	7	7	0.52	tr|J4DA94|TOT_040000897 J4DA94_THEOR Sodium transporter n=4 Tax_Id=869250 [Theileria orientalis strain Shintoku]	Cellular organisation and transport
J4DNT8	65	45161	2	1	2	1	0.07	tr|J4DNT8|TOT_010000989 J4DNT8_THEOR Porin n=4 Tax_Id=869250 [Theileria orientalis strain Shintoku]	Cellular organisation and transport
A0DCE0	35	57462	1	1	1	1	0.06	tr|A0DCE0|GSPATT00015585001 A0DCE0_PARTE ATP synthase subunit alpha n=3 Tax_Id=5888 [Paramecium tetraurelia]	Metabolism
J4C2L1	128	68654	8	8	7	7	0.38	tr|J4C2L1|TOT_010000348 J4C2L1_THEOR ATP synthase subunit beta n=4 Tax_Id=869250 [Theileria orientalis strain Shintoku]	Metabolism
J4C465	31	40231	1	1	1	1	0.08	tr|J4C465|TOT_040000027 J4C465_THEOR Ubiquinol-cytochrome c reductase n=4 Tax_Id=869250 [Theileria orientalis strain Shintoku]	Metabolism
J4C7N6	88	60651	5	1	5	1	0.05	tr|J4C7N6|TOT_010000811 J4C7N6_THEOR GMP synthase n=4 Tax_Id=869250 [Theileria orientalis strain Shintoku]	Metabolism
J4C8J1	128	69365	11	6	9	5	0.26	tr|J4C8J1|TOT_030000139 J4C8J1_THEOR FAD-dependent glycerol-3-phosphate dehydrogenase n=4 Tax_Id=869250 [Theileria orientalis strain Shintoku]	Metabolism
J4CDE4	60	59748	7	2	5	2	0.11	tr|J4CDE4|TOT_030000258 J4CDE4_THEOR ATP synthase subunit alpha n=4 Tax_Id=869250 [Theileria orientalis strain Shintoku]	Metabolism
J4CE35	44	45302	3	1	3	1	0.07	tr|J4CE35|TOT_040000572 J4CE35_THEOR Cytochrome C1 n=4 Tax_Id=869250 [Theileria orientalis strain Shintoku]	Metabolism
J4D5A4	75	38396	2	2	1	1	0.09	tr|J4D5A4|TOT_010001237 J4D5A4_THEOR Glycerol-3-phosphate dehydrogenase [NAD(+)] n=4 Tax_Id=869250 [Theileria orientalis strain Shintoku]	Metabolism
J4D7V7	46	93181	2	1	1	1	0.04	tr|J4D7V7|TOT_020000652 J4D7V7_THEOR Citrate synthase n=4 Tax_Id=869250 [Theileria orientalis strain Shintoku]	Metabolism
J4DNY3	47	25933	5	1	3	1	0.13	tr|J4DNY3|TOT_020000030 J4DNY3_THEOR Cytochrome Coxidase subunit n=4 Tax_Id=869250 [Theileria orientalis strain Shintoku]	Metabolism
J4DPT1	57	63204	5	2	4	2	0.11	tr|J4DPT1|TOT_030000507 J4DPT1_THEOR Glucose-6-phosphate isomerase n=4 Tax_Id=869250 [Theileria orientalis strain Shintoku]	Metabolism
J4DPW8	115	55582	8	4	6	3	0.19	tr|J4DPW8|TOT_030000690 J4DPW8_THEOR Adenosylhomocysteinase n=4 Tax_Id=869250 [Theileria orientalis strain Shintoku]	Metabolism
J4DPZ4	51	48025	1	1	1	1	0.07	tr|J4DPZ4|TOT_030000822 J4DPZ4_THEOR Glycogen synthase kinase n=4 Tax_Id=869250 [Theileria orientalis strain Shintoku]	Metabolism
J7MBT2	53	54620	3	1	3	1	0.06	tr|J7MBT2|TOT_010000041 J7MBT2_THEOR Hexokinase n=4 Tax_Id=869250 [Theileria orientalis strain Shintoku]	Metabolism
J9G2T1	51	53357	1	1	1	1	0.06	tr|J9G2T1|OXYTRI_17567 J9G2T1_9SPIT Serine/threonine protein kinase n=2 Tax_Id=1172189 [Oxytricha trifallax]	Transcription, regulation and signalling
W7AN33	57	72320	2	1	1	1	0.05	tr|W7AN33|YYG_01332 W7AN33_PLAVN Phosphatidylinositol glycan, class Q n=2 Tax_Id=138298 [Plasmodium vinckei petteri]	Host cell attachment and interaction
161869	65	70929	5	4	3	3	0.14	gi|161869|gb|AAA30130.1| heat shock protein n=1 Tax_Id=5874 [Theileria annulata]	Homeostasis
P24724	54	83615	4	1	4	1	0.04	sp|P24724|TP02_0244 HSP90_THEPA Heat shock protein 90 n=4 Tax_Id=5875 [Theileria parva]	Homeostasis
3169849	45	23699	1	1	1	1	0.14	gi|3169849|gb|AAC33425.1| heat shock protein 70 n=1 Tax_Id=5888 [Paramecium tetraurelia]	Homeostasis
331686225	59	71045	2	2	1	1	0.05	gi|331686225|gb|AED86994.1| heat shock protein 70 n=1 Tax_Id=94289 [Sterkiella histriomuscorum]	Homeostasis
157064891	63	64309	3	3	2	2	0.1	gi|157064891|gb|AAY63878.2| heat shock protein 70 Tax_Id=88457 [Cyclospora cercopitheci]	Homeostasis
A0A078ADY9	45	152967	2	2	1	1	0.02	tr|A0A078ADY9|Contig15770.g16809 A0A078ADY9_STYLE Zinc carboxypeptidase family protein n=2 Tax_Id=5949 [Stylonychia lemnae]	Transcription, regulation and signalling
F5AMN5	69	71045	3	2	2	1	0.05	tr|F5AMN5|hsp70 F5AMN5_OXYTR Heat shock protein 70 n=1 Tax_Id=1172189 [Oxytricha trifallax]	Homeostasis
F5AMN6	57	71099	2	1	2	1	0.05	tr|F5AMN6|hsp70 F5AMN6_STENO Heat shock protein 70 n=2 Tax_Id=200597 [Sterkiella nova]	Homeostasis
J4C8F5	134	51518	13	6	7	5	0.36	tr|J4C8F5|TOT_020000952 J4C8F5_THEOR Metalloprotease n=4 Tax_Id=869250 [Theileria orientalis strain Shintoku]	Protein processing and turnover
J4DNF9	68	115479	4	1	4	1	0.03	tr|J4DNF9|TOT_010000356 J4DNF9_THEOR Aminopeptidase N n=4 Tax_Id=869250 [Theileria orientalis strain Shintoku]	Protein processing and turnover
J4DP17	60	59044	3	1	3	1	0.06	tr|J4DP17|TOT_020000200 J4DP17_THEOR Mitochondrial processing peptidase subunit alpha n=4 Tax_Id=869250 [Theileria orientalis strain Shintoku]	Protein processing and turnover
J7M4K0	71	63907	6	2	4	2	0.1	tr|J7M4K0|TOT_010000137 J7M4K0_THEOR Mitochondrial processing peptidase n=4 Tax_Id=869250 [Theileria orientalis strain Shintoku]	Protein processing and turnover
M9MTE1	107	56043	6	3	3	1	0.06	tr|M9MTE1|M9MTE1_9APIC Thiol protease n=2 Tax_Id=507731 [Theileria uilenbergi]	Protein processing and turnover
Cvel_16772	38	87636	1	1	1	1	0.04	eupathdb|Cvel_16772|Ribonuclease inhibitor, putative n=1 Tax_Id=1169474 [Chromera velia CCMP2878]	Transcription, regulation and signalling
XP_002371198.1	58	134452	1	1	1	1	0.02	ref|XP_002371198.1| DNA gyrase subunit B, putative n=2 Tax_Id=508771 [Toxoplasma gondii ME49]	Transcription, regulation and signalling
B3LD03	38	264842	7	1	1	1	0.01	tr|B3LD03|PKH_145310 B3LD03_PLAKH AP2 family, putative n=4 Tax_Id=5851 [Plasmodium knowlesi (strain H)]	Transcription, regulation and signalling
I7J5W7	44	109606	1	1	1	1	0.03	tr|I7J5W7|BBM_II00555 I7J5W7_BABMI Serine/threonine-protein phosphatase n=3 Tax_Id=1133968 [Babesia microti strain RI]	Transcription, regulation and signalling
J4C3C5	95	39209	5	3	5	3	0.27	tr|J4C3C5|TOT_020001061 J4C3C5_THEOR Diacylglycerol kinase n=4 Tax_Id=869250 [Theileria orientalis strain Shintoku]	Metabolism
J4C807	88	20392	6	4	4	3	0.58	tr|J4C807|TOT_020001000 J4C807_THEOR ADP-ribosylation factor n=4 Tax_Id=869250 [Theileria orientalis strain Shintoku]	Transcription, regulation and signalling
J4C9B4	76	36544	2	2	2	2	0.19	tr|J4C9B4|TOT_040000613 J4C9B4_THEOR G protein beta subunit-like polypeptide n=4 Tax_Id=869250 [Theileria orientalis strain Shintoku]	Transcription, regulation and signalling
J4D965	48	50767	1	1	1	1	0.06	tr|J4D965|TOT_030000922 J4D965_THEOR DEAD-box family helicase n=4 Tax_Id=869250 [Theileria orientalis strain Shintoku]	Transcription, regulation and signalling
J4DPU6	79	44982	1	1	1	1	0.07	tr|J4DPU6|TOT_030000582 J4DPU6_THEOR Bifunctional nuclease n=4 Tax_Id=869250 [Theileria orientalis strain Shintoku]	Transcription, regulation and signalling
S6BNQ9	73	51270	1	1	1	1	0.06	tr|S6BNQ9|BBOV_III011020 S6BNQ9_BABBO Histone deacetylase n=2 Tax_Id=5865 [Babesia bovis]	Transcription, regulation and signalling
Q4U8U5	167	31157	6	3	4	2	0.22	sp|Q4U8U5|TA10185 RSSA_THEAN 40S ribosomal protein SA n=4 Tax_Id=5874 [Theileria annulata]	Translation
A0A023BBF6	34	14235	3	1	1	1	0.24	tr|A0A023BBF6|GNI_027100 A0A023BBF6_GRENI 40S ribosomal protein S15 n=4 Tax_Id=110365 [Gregarina niphandrodes]	Translation
A0BL60	61	48130	1	1	1	1	0.07	tr|A0BL60|GSPATT00029908001 A0BL60_PARTE Elongation factor 1-alpha n=3 Tax_Id=5888 [Paramecium tetraurelia]	Translation
J4C975	40	42379	1	1	1	1	0.08	tr|J4C975|TOT_040000424 J4C975_THEOR Elongation factor 1-gamma n=4 Tax_Id=869250 [Theileria orientalis strain Shintoku]	Translation
J4D5X2	117	49467	7	5	5	3	0.21	tr|J4D5X2|TOT_010000685 J4D5X2_THEOR Elongation factor 1-alpha n=4 Tax_Id=869250 [Theileria orientalis strain Shintoku]	Translation
J4DA68	72	31345	3	2	3	2	0.22	tr|J4DA68|TOT_040000181 J4DA68_THEOR 40S ribosomal protein SA n=4 Tax_Id=869250 [Theileria orientalis strain Shintoku]	Translation
J7MCB4	80	24272	1	1	1	1	0.14	tr|J7MCB4|TOT_040000980 J7MCB4_THEOR 60S ribosomal L1/L10a protein n=4 Tax_Id=869250 [Theileria orientalis strain Shintoku]	Translation
J4CD11	82	24187	1	1	1	1	0.14	tr|J4CD11|TOT_020001070 J4CD11_THEOR Transmembrane protein 17 n=4 Tax_Id=869250 [Theileria orientalis strain Shintoku]	Uncharacterised protein
EfaB_PLUS_40565.g2565	49	44904	2	1	1	1	0.07	eupathdb|EfaB_PLUS_40565.g2565|unspecified product n=1 Tax_Id=84963 [Eimeria falciformis Bayer Haberkorn 1970]	Uncharacterised protein
Vbra_12830	47	49525	2	1	1	1	0.07	eupathdb|Vbra_12830|Hypothetical protein n=1 Tax_Id=1169540 [Vitrella brassicaformis CCMP3155]	Uncharacterised protein
Vbra_14166	41	619963	2	1	1	1	0.01	eupathdb|Vbra_14166|Hypothetical protein n=1 Tax_Id=1169540 [Vitrella brassicaformis CCMP3155]	Uncharacterised protein
Vbra_14429	47	109289	2	1	1	1	0.03	eupathdb|Vbra_14429|Alpha/beta hydrolase domain-containing protein 17A, putative n=1 Tax_Id=1169540 [Vitrella brassicaformis CCMP3155]	Uncharacterised protein
Vbra_14471	42	64104	1	1	1	1	0.05	eupathdb|Vbra_14471|Uncharacterized abhydrolase domain-containing, putative n=1 Tax_Id=1169540 [Vitrella brassicaformis CCMP3155]	Uncharacterised protein
Vbra_17422	49	120095	1	1	1	1	0.03	eupathdb|Vbra_17422|Hypothetical protein n=1 Tax_Id=1169540 [Vitrella brassicaformis CCMP3155]	Uncharacterised protein
Vbra_588	52	21975	1	1	1	1	0.15	eupathdb|Vbra_588|Hypothetical protein n=1 Tax_Id=1169540 [Vitrella brassicaformis CCMP3155]	Uncharacterised protein
672575540	30	10914	1	1	1	1	0.32	gi|672575540|gb|KFH13854.1| putative transmembrane protein, partial n=1 Tax_Id=943118 [Toxoplasma gondii MAS]	Uncharacterised protein
XP_001009271.2	42	318993	11	1	3	1	0.01	ref|XP_001009271.2| hypothetical protein TTHERM_00845810 n=1 Tax_Id=5911 [Tetrahymena thermophila]	Uncharacterised protein
XP_004034694.1	61	78291	4	1	2	1	0.04	ref|XP_004034694.1| hypothetical protein IMG5_115940, partial n=2 Tax_Id=5932 [Ichthyophthirius multifiliis]	Uncharacterised protein
A0A024XAY8	37	189862	2	1	1	1	0.02	tr|A0A024XAY8|PFMC_01496 A0A024XAY8_PLAFC Uncharacterized protein n=2 Tax_Id=5835 [Plasmodium falciparum (isolate Camp / Malaysia)]	Uncharacterised protein
A0A060RUV7	42	99893	1	1	1	1	0.03	tr|A0A060RUV7|PRCDC_0606200 A0A060RUV7_PLARE Uncharacterized protein n=3 Tax_Id=5854 [Plasmodium reichenowi]	Uncharacterised protein
A0CR93	45	177715	1	1	1	1	0.02	tr|A0CR93|GSPATT00009625001 A0CR93_PARTE Chromosome undetermined scaffold_25, whole genome shotgun sequence n=3 Tax_Id=5888 [Paramecium tetraurelia]	Uncharacterised protein
A0EA53	35	84000	1	1	1	1	0.04	tr|A0EA53|GSPATT00024902001 A0EA53_PARTE Chromosome undetermined scaffold_85, whole genome shotgun sequence n=3 Tax_Id=5888 [Paramecium tetraurelia]	Uncharacterised protein
B3KZX4	46	55875	1	1	1	1	0.06	tr|B3KZX4|PKH_031020 B3KZX4_PLAKH Pf52 homologue, putative n=4 Tax_Id=5851 [Plasmodium knowlesi (strain H)]	Uncharacterised protein
B3L1E3	36	100301	1	1	1	1	0.03	tr|B3L1E3|PKH_051620 B3L1E3_PLAKH Uncharacterized protein n=3 Tax_Id=5851 [Plasmodium knowlesi (strain H)]	Uncharacterised protein
C5K8R6	31	18541	1	1	1	1	0.18	tr|C5K8R6|Pmar_PMAR000210 C5K8R6_PERM5 Putative uncharacterized protein n=3 Tax_Id=423536 [Perkinsus marinus (strain ATCC 50983 / TXsc)]	Uncharacterised protein
F0V8D0	50	436224	1	1	1	1	0.01	tr|F0V8D0|NCLIV_004480 F0V8D0_NEOCL Complete genome, chromosome Ib n=4 Tax_Id=572307 [Neospora caninum (strain Liverpool)]	Uncharacterised protein
F0VE42	46	421297	2	1	1	1	0.01	tr|F0VE42|NCLIV_017770 F0VE42_NEOCL Complete genome, chromosome VI n=4 Tax_Id=572307 [Neospora caninum (strain Liverpool)]	Uncharacterised protein
G0QQM9	67	49675	2	1	1	1	0.07	tr|G0QQM9|IMG5_081390 G0QQM9_ICHMG Myb-like DNA-binding domain protein n=3 Tax_Id=857967 [Ichthyophthirius multifiliis (strain G5)]	Uncharacterised protein
J4C2L8	41	64171	1	1	1	1	0.05	tr|J4C2L8|TOT_010000383 J4C2L8_THEOR Uncharacterized protein n=4 Tax_Id=869250 [Theileria orientalis strain Shintoku]	Uncharacterised protein
J4C371	49	15731	2	1	2	1	0.21	tr|J4C371|TOT_020000202 J4C371_THEOR Uncharacterized protein n=4 Tax_Id=869250 [Theileria orientalis strain Shintoku]	Uncharacterised protein
J4C3E8	69	21147	5	4	5	4	0.8	tr|J4C3E8|TOT_020000575 J4C3E8_THEOR Uncharacterized protein n=4 Tax_Id=869250 [Theileria orientalis strain Shintoku]	Uncharacterised protein
J4C3M5	67	45773	9	5	6	3	0.23	tr|J4C3M5|TOT_020000955 J4C3M5_THEOR Uncharacterized protein n=4 Tax_Id=869250 [Theileria orientalis strain Shintoku]	Uncharacterised protein
J4C7G7	44	28403	1	1	1	1	0.12	tr|J4C7G7|TOT_010000473 J4C7G7_THEOR Conserved transmembrane protein n=4 Tax_Id=869250 [Theileria orientalis strain Shintoku]	Uncharacterised protein
J4C7J9	119	55434	1	1	1	1	0.06	tr|J4C7J9|TOT_010000629 J4C7J9_THEOR Uncharacterized protein n=4 Tax_Id=869250 [Theileria orientalis strain Shintoku]	Uncharacterised protein
J4C8L6	40	18693	2	1	2	1	0.18	tr|J4C8L6|TOT_030000264 J4C8L6_THEOR Uncharacterized protein n=4 Tax_Id=869250 [Theileria orientalis strain Shintoku]	Uncharacterised protein
J4C8Y8	51	104039	1	1	1	1	0.03	tr|J4C8Y8|TOT_030000877 J4C8Y8_THEOR Uncharacterized protein n=4 Tax_Id=869250 [Theileria orientalis strain Shintoku]	Uncharacterised protein
J4C998	44	27708	1	1	1	1	0.12	tr|J4C998|TOT_040000533 J4C998_THEOR Uncharacterized protein n=4 Tax_Id=869250 [Theileria orientalis strain Shintoku]	Uncharacterised protein
J4C9B1	89	19905	2	2	1	1	0.17	tr|J4C9B1|TOT_040000598 J4C9B1_THEOR Uncharacterized protein n=4 Tax_Id=869250 [Theileria orientalis strain Shintoku]	Uncharacterised protein
J4CCU2	55	19810	2	1	2	1	0.17	tr|J4CCU2|TOT_020000254 J4CCU2_THEOR Uncharacterized protein n=4 Tax_Id=869250 [Theileria orientalis strain Shintoku]	Uncharacterised protein
J4CD29	56	399879	3	1	3	1	0.01	tr|J4CD29|TOT_020000678 J4CD29_THEOR Uncharacterized protein n=4 Tax_Id=869250 [Theileria orientalis strain Shintoku]	Uncharacterised protein
J4CD54	124	814295	5	4	4	3	0.01	tr|J4CD54|TOT_020000802 J4CD54_THEOR Uncharacterized protein n=4 Tax_Id=869250 [Theileria orientalis strain Shintoku]	Uncharacterised protein
J4CDD8	97	33589	4	4	3	3	0.32	tr|J4CDD8|TOT_030000228 J4CDD8_THEOR Uncharacterized protein n=4 Tax_Id=869250 [Theileria orientalis strain Shintoku]	Uncharacterised protein
J4CDQ4	190	65512	3	2	2	1	0.05	tr|J4CDQ4|TOT_030000810 J4CDQ4_THEOR Uncharacterized protein n=4 Tax_Id=869250 [Theileria orientalis strain Shintoku]	Uncharacterised protein
J4CE20	42	32901	2	1	2	1	0.1	tr|J4CE20|TOT_040000906 J4CE20_THEOR Uncharacterized protein n=4 Tax_Id=869250 [Theileria orientalis strain Shintoku]	Uncharacterised protein
J4D5B6	100	25935	5	1	3	1	0.13	tr|J4D5B6|TOT_010001245 J4D5B6_THEOR Uncharacterized protein n=4 Tax_Id=869250 [Theileria orientalis strain Shintoku]	Uncharacterised protein
J4D5C9	64	35563	5	3	4	2	0.19	tr|J4D5C9|TOT_010000337 J4D5C9_THEOR Uncharacterized protein n=4 Tax_Id=869250 [Theileria orientalis strain Shintoku]	Uncharacterised protein
J4D6Q2	36	49144	1	1	1	1	0.07	tr|J4D6Q2|TOT_010001169 J4D6Q2_THEOR Uncharacterized protein n=4 Tax_Id=869250 [Theileria orientalis strain Shintoku]	Uncharacterised protein
J4D924	280	48727	9	8	5	4	0.3	tr|J4D924|TOT_030000413 J4D924_THEOR Uncharacterized protein n=4 Tax_Id=869250 [Theileria orientalis strain Shintoku]	Uncharacterised protein
J4DNQ7	35	20234	2	1	2	1	0.17	tr|J4DNQ7|TOT_010001305 J4DNQ7_THEOR Uncharacterized protein n=4 Tax_Id=869250 [Theileria orientalis strain Shintoku]	Uncharacterised protein
J4DNS8	55	120691	2	1	2	1	0.03	tr|J4DNS8|TOT_010000939 J4DNS8_THEOR Uncharacterized protein n=4 Tax_Id=869250 [Theileria orientalis strain Shintoku]	Uncharacterised protein
J4DPA6	60	41310	2	2	2	2	0.17	tr|J4DPA6|TOT_020001075 J4DPA6_THEOR Uncharacterized protein n=4 Tax_Id=869250 [Theileria orientalis strain Shintoku]	Uncharacterised protein
J4DPB7	144	467903	3	3	3	3	0.02	tr|J4DPB7|TOT_020000680 J4DPB7_THEOR Uncharacterized protein n=4 Tax_Id=869250 [Theileria orientalis strain Shintoku]	Uncharacterised protein
J4DPI3	59	99227	1	1	1	1	0.03	tr|J4DPI3|TOT_030000016 J4DPI3_THEOR Uncharacterized protein n=4 Tax_Id=869250 [Theileria orientalis strain Shintoku]	Uncharacterised protein
J4DQ05	195	27690	12	8	7	3	0.57	tr|J4DQ05|TOT_030000878 J4DQ05_THEOR Uncharacterized protein n=4 Tax_Id=869250 [Theileria orientalis strain Shintoku]	Uncharacterised protein
J7M4H3	125	174311	4	3	3	2	0.04	tr|J7M4H3|TOT_010000004 J7M4H3_THEOR Uncharacterized protein n=4 Tax_Id=869250 [Theileria orientalis strain Shintoku]	Uncharacterised protein
J7MH10	43	7370	1	1	1	1	0.48	tr|J7MH10|TOT_040000818 J7MH10_THEOR Uncharacterized protein n=4 Tax_Id=869250 [Theileria orientalis strain Shintoku]	Uncharacterised protein
J9FWL8	28	244983	1	1	1	1	0.01	tr|J9FWL8|OXYTRI_19993 J9FWL8_9SPIT Dopey, N-terminal domain-containing protein n=2 Tax_Id=1172189 [Oxytricha trifallax]	Uncharacterised protein
J9I393	53	54833	1	1	1	1	0.06	tr|J9I393|OXYTRI_06854 J9I393_9SPIT Uncharacterized protein n=2 Tax_Id=1172189 [Oxytricha trifallax]	Uncharacterised protein
J9II77	44	253313	1	1	1	1	0.01	tr|J9II77|OXYTRI_07868 J9II77_9SPIT Uncharacterized protein n=2 Tax_Id=1172189 [Oxytricha trifallax]	Uncharacterised protein
J9J2E2	27	40670	1	1	1	1	0.08	tr|J9J2E2|OXYTRI_23283 J9J2E2_9SPIT Uncharacterized protein n=2 Tax_Id=1172189 [Oxytricha trifallax]	Uncharacterised protein
J9J7H6	68	157108	1	1	1	1	0.02	tr|J9J7H6|OXYTRI_15840 J9J7H6_9SPIT TTL domain containing protein n=2 Tax_Id=1172189 [Oxytricha trifallax]	Uncharacterised protein
L0B1Y5	85	36401	1	1	1	1	0.09	tr|L0B1Y5|BEWA_005520 L0B1Y5_BABEQ Guanine nucleotide-binding protein, putative n=3 Tax_Id=1537102 [Babesia equi strain WA]	Uncharacterised protein
L1LEC2	30	120699	1	1	1	1	0.03	tr|L1LEC2|BEWA_037320 L1LEC2_BABEQ Uncharacterized protein n=3 Tax_Id=1537102 [Babesia equi strain WA]	Uncharacterised protein
Q4N2M8	43	14160	2	1	2	1	0.24	tr|Q4N2M8|TP04_0320 Q4N2M8_THEPA Uncharacterized protein n=4 Tax_Id=5875 [Theileria parva]	Uncharacterised protein
Q4UB63	46	31095	4	1	4	1	0.11	tr|Q4UB63|TA17920 Q4UB63_THEAN Genomic DNA chromosome 3 n=4 Tax_Id=5874 [Theileria annulata]	Uncharacterised protein
Q4UEW2	53	29294	1	1	1	1	0.11	tr|Q4UEW2|TA14115 Q4UEW2_THEAN Genomic DNA chromosome 2 n=4 Tax_Id=5874 [Theileria annulata]	Uncharacterised protein
U6GE29	42	94210	1	1	1	1	0.03	tr|U6GE29|EPH_0047760 U6GE29_9EIME Uncharacterized protein n=3 Tax_Id=51316 [Eimeria praecox]	Uncharacterised protein
U6GF24	32	146384	1	1	1	1	0.02	tr|U6GF24|EAH_00030190 U6GF24_EIMAC Uncharacterized protein n=3 Tax_Id=5801 [Eimeria acervulina]	Uncharacterised protein
U6H4V6	36	96014	1	1	1	1	0.03	tr|U6H4V6|EPH_0076150 U6H4V6_9EIME Uncharacterized protein n=3 Tax_Id=51316 [Eimeria praecox]	Uncharacterised protein
U6KN91	64	130571	2	1	1	1	0.02	tr|U6KN91|ETH_00024950 U6KN91_EIMTE Uncharacterized protein n=3 Tax_Id=5802 [Eimeria tenella]	Uncharacterised protein
U6L416	41	129454	1	1	1	1	0.03	tr|U6L416|ETH_00008360 U6L416_EIMTE Uncharacterized protein n=3 Tax_Id=5802 [Eimeria tenella]	Uncharacterised protein
U6M6D4	47	546861	2	1	1	1	0.01	tr|U6M6D4|EMWEY_00004820 U6M6D4_EIMMA Uncharacterized protein n=3 Tax_Id=5804 [Eimeria maxima]	Uncharacterised protein
U6M9F1	57	51948	1	1	1	1	0.06	tr|U6M9F1|EMWEY_00014950 U6M9F1_EIMMA Uncharacterized protein n=3 Tax_Id=5804 [Eimeria maxima]	Uncharacterised protein
W7JUR9	61	98818	2	1	1	1	0.03	tr|W7JUR9|C923_00700 W7JUR9_PLAFA Uncharacterized protein n=2 Tax_Id=1237627 [Plasmodium falciparum UGT5.1]	Uncharacterised protein
157313389	114	15973	100	21	4	3	0.78	gi|157313389|gb|ABV32563.1| piroplasm major immunodominant protein Tax_Id=203685 [Theileria sp. ex Yamaguchi Sika Deer]	Host cell attachment and interaction
225320245	923	23133	47	32	17	11	6.56	gi|225320245|dbj|BAH29779.1| 23 kDa piroplasm membrane protein n=1 Tax_Id=68886 [Theileria orientalis]	Host cell attachment and interaction
324021528	5770	29451	427	233	53	29	45.59	gi|324021528|dbj|BAJ78418.1| major piroplasm surface protein n=1 Tax_Id=68886 [Theileria orientalis]	Host cell attachment and interaction
A0A077XIG0	42	33181	1	1	1	1	0.1	tr|A0A077XIG0|PBANKA_131910 A0A077XIG0_PLABA Hemolysin, putative n=3 Tax_Id=5823 [Plasmodium berghei (strain Anka)]	Host cell attachment and interaction
J4CDK5	138	53548	12	9	9	7	0.52	tr|J4CDK5|TOT_030000565 J4CDK5_THEOR Tocp1 variant tocp4 n=5 Tax_Id=869250 [Theileria orientalis strain Shintoku]	Host cell attachment and interaction
J4DP87	753	25922	46	34	17	11	6.74	tr|J4DP87|TOT_020000539 J4DP87_THEOR TS-Ikeda type piroplasm surface protein n=4 Tax_Id=869250 [Theileria orientalis strain Shintoku]	Host cell attachment and interaction
Ikeda aqueous
Accession	Score	Mass	Num. of matches	No of signif matches	No of seqs	No of signif seqs	emPAI	Description	Comments
CON_P02070	1704	15944	202	105	59	34	4574.07	sp|CON_P02070|Hemoglobin subunit beta OS=Bos taurus GN=HBB PE=1 SV=1 Tax_Id=9913 [Bos taurus]	Host protein
Q75R34	1089	21113	109	58	45	25	52.06	tr|Q75R34|ToLocg ToLocg 1 protein n=5 Tax_Id=68886 [Theileria orientalis]	Uncharacterised protein
J4C9B1	336	19905	46	16	23	9	3.06	tr|J4C9B1|TOT_040000598 Uncharacterized protein n=4 Tax_Id=869250 [Theileria orientalis strain Shintoku]	Uncharacterised protein
J4D7C0	150	20498	17	12	11	7	1.88	tr|J4D7C0|TOT_020000353 Uncharacterized protein n=4 Tax_Id=869250 [Theileria orientalis strain Shintoku]	Uncharacterised protein
CON_P01966	825	15175	125	39	65	35	1126.42	sp|CON_P01966|Hemoglobin subunit alpha OS=Bos taurus GN=HBA PE=1 SV=2 Tax_Id=9913 [Bos taurus]	Host protein
J4CCT6	735	77380	63	43	29	20	1.29	tr|J4CCT6|TOT_020000226 Heat shock protein 90 n=4 Tax_Id=869250 [Theileria orientalis strain Shintoku]	Homeostasis
99643830	232	65342	10	7	4	3	0.16	gi|99643830|emb|CAJ75750.1| heat shock protein 90 n=1 Tax_Id=225107 [Karenia mikimotoi]	Homeostasis
CON_P00761	714	24394	112	46	15	9	5.8	sp|CON_P00761|Trypsin OS=Sus scrofa PE=1 SV=1 Tax_Id=9823 [Sus scrofa]	Contaminant
J4D5X2	558	49467	49	26	32	14	1.46	tr|J4D5X2|TOT_010000685 Elongation factor 1-alpha n=4 Tax_Id=869250 [Theileria orientalis strain Shintoku]	Translation
J4DNS8	553	120691	35	24	24	17	0.57	tr|J4DNS8|TOT_010000939 Uncharacterized protein n=4 Tax_Id=869250 [Theileria orientalis strain Shintoku]	Uncharacterised protein
J4D700	518	71161	56	28	33	19	1.35	tr|J4D700|TOT_020000137 Heat shock protein n=4 Tax_Id=869250 [Theileria orientalis strain Shintoku]	Homeostasis
A0A024W9A3	103	73868	8	4	5	3	0.14	tr|A0A024W9A3|PFTANZ_02203 Hsp70-like protein n=10 Tax_Id=1036725 [Plasmodium falciparum Tanzania (2000708)]	Homeostasis
111120235	59	69301	5	2	5	2	0.1	gi|111120235|dbj|BAF02624.1| heat shock protein 70 Tax_Id=237578 [Theileria ovis]	Homeostasis
J4C4A7	58	72528	4	2	4	2	0.09	tr|J4C4A7|TOT_040000236 Heat-shock protein HSP70 n=4 Tax_Id=869250 [Theileria orientalis strain Shintoku]	Homeostasis
J7MF68	439	19977	48	23	28	14	9.21	tr|J7MF68|TOT_040000841 Uncharacterized protein n=4 Tax_Id=869250 [Theileria orientalis strain Shintoku]	Uncharacterised protein
J4DPH8	419	24023	32	21	23	19	10.83	tr|J4DPH8|TOT_020001109 Uncharacterized protein n=4 Tax_Id=869250 [Theileria orientalis strain Shintoku]	Uncharacterised protein
J4C7N6	418	60651	37	17	17	9	0.61	tr|J4C7N6|TOT_010000811 GMP synthase n=4 Tax_Id=869250 [Theileria orientalis strain Shintoku]	Metabolism
J7MC36	383	26390	18	14	11	8	1.29	tr|J7MC36|TOT_010001227 Peptidyl-prolyl cis-trans isomerase n=4 Tax_Id=869250 [Theileria orientalis strain Shintoku]	Homeostasis
J4DNF9	360	115479	33	18	27	15	0.56	tr|J4DNF9|TOT_010000356 Aminopeptidase N n=4 Tax_Id=869250 [Theileria orientalis strain Shintoku]	Protein processing and turnover
Q4UGX3	128	111480	6	4	4	3	0.09	tr|Q4UGX3|TA20910 Aminopeptidase n, putative n=4 Tax_Id=5874 [Theileria annulata]	Protein processing and turnover
J4C379	308	137725	26	16	25	16	0.45	tr|J4C379|TOT_020000238 Uncharacterized protein n=4 Tax_Id=869250 [Theileria orientalis strain Shintoku]	Uncharacterised protein
J7M4S6	302	19060	38	13	26	10	4.93	tr|J7M4S6|TOT_040000842 Uncharacterized protein n=4 Tax_Id=869250 [Theileria orientalis strain Shintoku]	Uncharacterised protein
J4DPB7	302	467903	43	19	40	18	0.13	tr|J4DPB7|TOT_020000680 Uncharacterized protein n=4 Tax_Id=869250 [Theileria orientalis strain Shintoku]	Uncharacterised protein
J4C447	271	186696	29	13	27	12	0.23	tr|J4C447|TOT_030000951 Carbamoyl phosphate synthase II n=4 Tax_Id=869250 [Theileria orientalis strain Shintoku]	Metabolism
J4DPW8	270	55582	39	12	26	10	0.77	tr|J4DPW8|TOT_030000690 Adenosylhomocysteinase n=4 Tax_Id=869250 [Theileria orientalis strain Shintoku]	Metabolism
J4DPA8	261	55835	36	10	23	9	0.67	tr|J4DPA8|TOT_020000636 Adenosylhomocysteinase n=4 Tax_Id=869250 [Theileria orientalis strain Shintoku]	Metabolism
J4C376	256	90477	10	8	10	8	0.33	tr|J4C376|TOT_020001035 Heat shock protein n=4 Tax_Id=869250 [Theileria orientalis strain Shintoku]	Homeostasis
J7MEX4	248	123289	26	15	26	15	0.48	tr|J7MEX4|TOT_010001232 Importin beta n=4 Tax_Id=869250 [Theileria orientalis strain Shintoku]	Cellular organisation and transport
J4D5K0	246	90411	25	14	14	7	0.28	tr|J4D5K0|TOT_010000480 Elongation factor 2 n=4 Tax_Id=869250 [Theileria orientalis strain Shintoku]	Translation
Q4N8E2	144	92046	23	12	14	7	0.28	tr|Q4N8E2|TP01_0529 Elongation factor 2, putative n=4 Tax_Id=5875 [Theileria parva]	Translation
J4DAA3	238	48034	12	8	11	8	0.7	tr|J4DAA3|TOT_040000220 Enolase n=4 Tax_Id=869250 [Theileria orientalis strain Shintoku]	Metabolism
U6LKG6	133	227664	3	2	3	2	0.03	tr|U6LKG6|EBH_0028300 Enolase 2, putative n=3 Tax_Id=51314 [Eimeria brunetti]	Metabolism
D0FY42	207	22127	14	8	9	6	1.33	tr|D0FY42|ToMRP Microneme-rhoptry related protein n=5 Tax_Id=68886 [Theileria orientalis]	Host cell attachment and interaction
J7MEZ0	203	79100	6	5	6	5	0.22	tr|J7MEZ0|TOT_040000682 Acetyl-coenzyme A synthetase n=4 Tax_Id=869250 [Theileria orientalis strain Shintoku]	Metabolism
J7MBT2	201	54620	14	8	12	7	0.5	tr|J7MBT2|TOT_010000041 Hexokinase 1 n=4 Tax_Id=869250 [Theileria orientalis strain Shintoku]	Metabolism
J4D6Z0	193	44926	19	12	15	9	0.89	tr|J4D6Z0|TOT_020000111 Eukaryotic translation initiation factor 4a n=4 Tax_Id=869250 [Theileria orientalis strain Shintoku]	Translation
J4D965	191	50767	19	12	16	10	0.87	tr|J4D965|TOT_030000922 DEAD-box family helicase n=4 Tax_Id=869250 [Theileria orientalis strain Shintoku]	Transcription, regulation and signalling
J4D6T1	186	47093	15	6	12	6	0.5	tr|J4D6T1|TOT_020000031 Aspartate aminotransferase, cytoplasmic n=4 Tax_Id=869250 [Theileria orientalis strain Shintoku]	Metabolism
Q4N3T5	183	41985	13	9	8	6	0.57	tr|Q4N3T5|TP02_0903 Actin, putative n=4 Tax_Id=5875 [Theileria parva]	Cellular organisation and transport
S7VNC9	170	32038	30	13	22	10	1.67	tr|S7VNC9|TGGT1_411760 Actin n=3 Tax_Id=507601 [Toxoplasma gondii GT1]	Cellular organisation and transport
13774290	138	40681	6	5	5	4	0.37	gi|13774290|gb|AAK38829.1| actin II Tax_Id=134027 [Diophrys sp. PPR2000]	Cellular organisation and transport
J4DNX9	180	19198	17	8	11	5	1.24	tr|J4DNX9|TOT_020000012 Uncharacterized protein n=4 Tax_Id=869250 [Theileria orientalis strain Shintoku]	Uncharacterised protein
J4C4D3	177	58793	10	7	9	7	0.46	tr|J4C4D3|TOT_040000365 Cytosol aminopeptidase n=4 Tax_Id=869250 [Theileria orientalis strain Shintoku]	Protein processing and turnover
J4CCC5	171	20634	28	18	19	12	5.06	tr|J4CCC5|TOT_010000613 Uncharacterized protein n=4 Tax_Id=869250 [Theileria orientalis strain Shintoku]	Uncharacterised protein
J4C2Q4	170	18910	15	9	15	9	3.36	tr|J4C2Q4|TOT_010000558 Uncharacterized protein n=4 Tax_Id=869250 [Theileria orientalis strain Shintoku]	Uncharacterised protein
J4CDC7	167	29581	6	4	5	3	0.38	tr|J4CDC7|TOT_030000173 40S ribosomal protein S3a n=4 Tax_Id=869250 [Theileria orientalis strain Shintoku]	Translation
J4C4I6	167	18143	11	4	6	3	0.67	tr|J4C4I6|TOT_040000621 60S ribosomal protein L12 n=4 Tax_Id=869250 [Theileria orientalis strain Shintoku]	Translation
J4D691	161	126547	10	6	10	6	0.16	tr|J4D691|TOT_010001316 Molecular chaperone protein n=4 Tax_Id=869250 [Theileria orientalis strain Shintoku]	Protein processing and turnover
J4C820	158	132593	9	5	9	5	0.13	tr|J4C820|TOT_020000290 Isoleucyl-tRNA synthetase n=4 Tax_Id=869250 [Theileria orientalis strain Shintoku]	Translation
J4C3S5	157	17042	6	5	5	4	1.05	tr|J4C3S5|TOT_030000212 Uncharacterized protein n=4 Tax_Id=869250 [Theileria orientalis strain Shintoku]	Uncharacterised protein
J4DPT1	152	63204	9	4	9	4	0.22	tr|J4DPT1|TOT_030000507 Glucose-6-phosphate isomerase n=4 Tax_Id=869250 [Theileria orientalis strain Shintoku]	Metabolism
J4D8Z5	150	16634	3	3	1	1	0.2	tr|J4D8Z5|TOT_030000363 60S ribosomal protein L34 n=4 Tax_Id=869250 [Theileria orientalis strain Shintoku]	Translation
J4D5C2	148	20489	7	3	6	3	0.57	tr|J4D5C2|TOT_010000322 Ribosomal protein S18 n=4 Tax_Id=869250 [Theileria orientalis strain Shintoku]	Translation
J4C2P6	146	47298	16	7	10	6	0.5	tr|J4C2P6|TOT_010000519 Ribosomal protein L3 n=4 Tax_Id=869250 [Theileria orientalis strain Shintoku]	Translation
J7MGU7	142	72208	7	4	7	4	0.19	tr|J7MGU7|TOT_010001228 Glutathione synthetase n=4 Tax_Id=869250 [Theileria orientalis strain Shintoku]	Metabolism
J4C3B5	141	16429	6	4	6	4	1.11	tr|J4C3B5|TOT_020000413 Nucleoside diphosphate kinase n=4 Tax_Id=869250 [Theileria orientalis strain Shintoku]	Metabolism
J4CD29	133	399879	10	6	9	6	0.05	tr|J4CD29|TOT_020000678 Uncharacterized protein n=4 Tax_Id=869250 [Theileria orientalis strain Shintoku]	Uncharacterised protein
J4CE31	132	128207	7	3	7	3	0.08	tr|J4CE31|TOT_040000552 Ran-binding protein n=4 Tax_Id=869250 [Theileria orientalis strain Shintoku]	Transcription, regulation and signalling
J7M4J1	129	42109	9	5	9	5	0.46	tr|J7M4J1|TOT_010000093 Fructose-bisphosphate aldolase 2 n=4 Tax_Id=869250 [Theileria orientalis strain Shintoku]	Metabolism
J4DPC0	129	107915	6	4	6	4	0.13	tr|J4DPC0|TOT_020000695 Ubiquitin-activating enzyme E1 n=4 Tax_Id=869250 [Theileria orientalis strain Shintoku]	Protein processing and turnover
J4CE53	127	13139	4	2	3	1	0.26	tr|J4CE53|TOT_040000661 60S ribosomal protein L36 n=4 Tax_Id=869250 [Theileria orientalis strain Shintoku]	Translation
J4DPB5	126	17594	4	2	4	2	0.42	tr|J4DPB5|TOT_020000671 Uncharacterized protein n=4 Tax_Id=869250 [Theileria orientalis strain Shintoku]	Uncharacterised protein
J4DNN3	124	47081	4	2	3	1	0.07	tr|J4DNN3|TOT_010000718 Eukaryotic translation initiation factor n=4 Tax_Id=869250 [Theileria orientalis strain Shintoku]	Translation
J4DAW7	123	16906	4	2	3	1	0.2	tr|J4DAW7|TOT_040000595 Bis-(5'-nucleosyl)-tetraphosphatase n=4 Tax_Id=869250 [Theileria orientalis strain Shintoku]	Protein processing and turnover
J7MGT8	120	120551	10	4	8	3	0.08	tr|J7MGT8|TOT_010000218 Eukaryotic translation initiation factor 3 subunit A n=4 Tax_Id=869250 [Theileria orientalis strain Shintoku]	Translation
J4C2K6	120	19576	9	6	6	3	0.61	tr|J4C2K6|TOT_010000323 60S ribosomal protein L11a n=4 Tax_Id=869250 [Theileria orientalis strain Shintoku]	Translation
J4DNZ8	118	159301	12	6	11	6	0.13	tr|J4DNZ8|TOT_020000105 Uncharacterized protein n=4 Tax_Id=869250 [Theileria orientalis strain Shintoku]	Uncharacterised protein
J4DNS3	117	45407	13	4	10	4	0.32	tr|J4DNS3|TOT_010000914 Phosphoglycerate kinase n=4 Tax_Id=869250 [Theileria orientalis strain Shintoku]	Metabolism
J4D667	116	17199	2	1	2	1	0.2	tr|J4D667|TOT_010000832 Eukaryotic translation initiation factor n=4 Tax_Id=869250 [Theileria orientalis strain Shintoku]	Translation
J4D7P2	116	18056	6	3	5	3	0.67	tr|J4D7P2|TOT_020001067 Uncharacterized protein n=4 Tax_Id=869250 [Theileria orientalis strain Shintoku]	Uncharacterised protein
J4C7X3	115	16523	6	4	4	3	0.74	tr|J4C7X3|TOT_020000059 60S ribosomal protein L27 n=4 Tax_Id=869250 [Theileria orientalis strain Shintoku]	Translation
J4C7D8	115	41870	12	7	10	7	0.7	tr|J4C7D8|TOT_010000330 Proliferation-associated protein 2g4 n=4 Tax_Id=869250 [Theileria orientalis strain Shintoku]	Cell division
J4DAW2	114	117671	2	1	2	1	0.03	tr|J4DAW2|TOT_040000585 Transcription modulator n=4 Tax_Id=869250 [Theileria orientalis strain Shintoku]	Transcription, regulation and signalling
J4CCK2	114	100496	11	5	11	5	0.17	tr|J4CCK2|TOT_010000992 Aconitate hydratase 3, mitochondrial n=4 Tax_Id=869250 [Theileria orientalis strain Shintoku]	Metabolism
J4DPL8	114	18492	5	3	4	2	0.39	tr|J4DPL8|TOT_030000190 60S ribosomal protein L25 n=4 Tax_Id=869250 [Theileria orientalis strain Shintoku]	Translation
Q4N187	113	22005	1	1	1	1	0.15	tr|Q4N187|TP04_0862 Nascent polypeptide associated complex alpha subunit, putative n=4 Tax_Id=5875 [Theileria parva]	Cellular organisation and transport
J4DPB3	111	56277	5	4	4	3	0.18	tr|J4DPB3|TOT_020000661 Glycerol kinase n=4 Tax_Id=869250 [Theileria orientalis strain Shintoku]	Metabolism
J4C7S3	108	28040	2	1	2	1	0.12	tr|J4C7S3|TOT_010000993 60S ribosomal protein L2/L8 n=4 Tax_Id=869250 [Theileria orientalis strain Shintoku]	Translation
J4DNE9	107	50724	7	3	5	3	0.21	tr|J4DNE9|TOT_010000307 Eukaryotic translation initiation factor 2 subunit gamma n=4 Tax_Id=869250 [Theileria orientalis strain Shintoku]	Translation
J4CC87	107	68898	6	2	6	2	0.1	tr|J4CC87|TOT_010000427 Uncharacterized protein n=4 Tax_Id=869250 [Theileria orientalis strain Shintoku]	Uncharacterised protein
J4D814	105	21255	1	1	1	1	0.16	tr|J4D814|TOT_020000755 60S ribosomal protein L18 n=4 Tax_Id=869250 [Theileria orientalis strain Shintoku]	Translation
J4C9A0	101	54524	3	1	3	1	0.06	tr|J4C9A0|TOT_040000543 Methylase n=4 Tax_Id=869250 [Theileria orientalis strain Shintoku]	Transcription, regulation and signalling
J4D5D2	100	17229	7	4	5	4	1.04	tr|J4D5D2|TOT_010000342 Deoxyuridine 5'-triphosphate nucleotidohydrolase n=4 Tax_Id=869250 [Theileria orientalis strain Shintoku]	Metabolism
CON_P02769	100	69248	12	4	8	4	0.2	sp|CON_P02769|Serum albumin OS=Bos taurus GN=ALB PE=1 SV=4 Tax_Id=9913 [Bos taurus]	Host protein
J4C3U4	99	103163	7	4	7	4	0.13	tr|J4C3U4|TOT_030000307 CGMP-dependent protein kinase n=4 Tax_Id=869250 [Theileria orientalis strain Shintoku]	Transcription, regulation and signalling
J4CCW5	98	11531	3	2	3	2	0.68	tr|J4CCW5|TOT_020000365 60S acidic ribosomal protein P2 n=4 Tax_Id=869250 [Theileria orientalis strain Shintoku]	Translation
J4C7Q3	97	73102	14	4	10	4	0.19	tr|J4C7Q3|TOT_010000894 Polyadenylate-binding protein n=4 Tax_Id=869250 [Theileria orientalis strain Shintoku]	Transcription, regulation and signalling
CON_Q9BGM5	96	49282	19	8	4	2	0.21	sp|CON_Q9BGM5|Keratin, type I cytoskeletal 25 OS=Ovis aries GN=KRT25 PE=2 SV=1 Tax_Id=9940 [Ovis aries]	Contaminant
B3L0A5	76	91145	13	2	3	1	0.04	tr|B3L0A5|PKH_031530 Putative uncharacterized protein n=4 Tax_Id=5851 [Plasmodium knowlesi (strain H)]	Uncharacterised protein
U6GFF9	96	9780	3	2	3	2	0.83	tr|U6GFF9|EAH_00038560 Ribosomal protein S14, related n=3 Tax_Id=5801 [Eimeria acervulina]	Translation
J4C975	96	42379	6	4	6	4	0.35	tr|J4C975|TOT_040000424 Elongation factor 1-gamma n=4 Tax_Id=869250 [Theileria orientalis strain Shintoku]	Translation
J4CE23	95	45914	5	2	5	2	0.15	tr|J4CE23|TOT_040000512 26S proteasome regulatory subunit n=4 Tax_Id=869250 [Theileria orientalis strain Shintoku]	Protein processing and turnover
J4DA98	93	66116	4	2	4	2	0.1	tr|J4DA98|TOT_040000210 Vacuolar H+-ATPase, a subunit n=4 Tax_Id=869250 [Theileria orientalis strain Shintoku]	Cellular organisation and transport
J4DPY3	93	28005	4	3	3	2	0.25	tr|J4DPY3|TOT_030000766 4-methyl-5(B-hydroxyethyl)-thiazol monophosphate biosynthesis enzyme n=4 Tax_Id=869250 [Theileria orientalis strain Shintoku]	Metabolism
J4D687	93	13223	4	2	4	2	0.58	tr|J4D687|TOT_010001312 Actin depolymerizing factor n=4 Tax_Id=869250 [Theileria orientalis strain Shintoku]	Cellular organisation and transport
J4DPR6	92	61828	9	4	9	4	0.23	tr|J4DPR6|TOT_030000432 Protein disulphide isomerase n=4 Tax_Id=869250 [Theileria orientalis strain Shintoku]	Homeostasis
J4CCQ5	92	18492	4	3	4	3	0.65	tr|J4CCQ5|TOT_020000073 60S ribosomal protein L21 n=4 Tax_Id=869250 [Theileria orientalis strain Shintoku]	Translation
J4C426	92	113081	2	1	2	1	0.03	tr|J4C426|TOT_030000712 Methionyl-tRNA synthetase n=4 Tax_Id=869250 [Theileria orientalis strain Shintoku]	Translation
A0A086LP02	91	208576	9	4	2	1	0.02	tr|A0A086LP02|TGRUB_216190 Uncharacterized protein n=3 Tax_Id=935652 [Toxoplasma gondii RUB]	Uncharacterised protein
J4DAZ1	91	15276	8	3	7	2	0.49	tr|J4DAZ1|TOT_040000634 40S ribosomal protein S24 n=4 Tax_Id=869250 [Theileria orientalis strain Shintoku]	Translation
J4CC71	90	56182	8	3	7	3	0.19	tr|J4CC71|TOT_010000349 Serine hydroxymethyltransferase n=4 Tax_Id=869250 [Theileria orientalis strain Shintoku]	Metabolism
J4C389	90	42571	2	2	2	2	0.16	tr|J4C389|TOT_020001043 Eukaryotic translation initiation factor 3 subunit H n=4 Tax_Id=869250 [Theileria orientalis strain Shintoku]	Translation
J4C2L2	90	104306	6	2	6	2	0.06	tr|J4C2L2|TOT_010000353 Coatomer complex subunit beta n=4 Tax_Id=869250 [Theileria orientalis strain Shintoku]	Cellular organisation and transport
Q4UIR4	90	14869	10	3	5	3	0.85	tr|Q4UIR4|TA16165 Ubiquitin/60S ribosomal fusion protein, putative n=4 Tax_Id=5874 [Theileria annulata]	Translation
J4C994	89	13995	4	2	4	2	0.54	tr|J4C994|TOT_040000513 60S ribosomal protein L22 n=4 Tax_Id=869250 [Theileria orientalis strain Shintoku]	Translation
J7M4N7	88	141002	6	2	6	2	0.05	tr|J7M4N7|TOT_040000717 Splicing factor 3b subunit n=4 Tax_Id=869250 [Theileria orientalis strain Shintoku]	Transcription, regulation and signalling
Q4UG17	87	56468	4	2	3	1	0.06	tr|Q4UG17|TA19860 DEAD box RNA helicase, putative n=4 Tax_Id=5874 [Theileria annulata]	Transcription, regulation and signalling
J4C8J6	86	15218	8	3	6	2	0.49	tr|J4C8J6|TOT_030000164 40S ribosomal protein S17 n=4 Tax_Id=869250 [Theileria orientalis strain Shintoku]	Translation
J4CDM7	86	18563	3	2	3	2	0.39	tr|J4CDM7|TOT_030000674 Adenylyl cyclase-associated protein n=4 Tax_Id=869250 [Theileria orientalis strain Shintoku]	Cellular organisation and transport
J4C2Z3	85	84715	2	1	2	1	0.04	tr|J4C2Z3|TOT_010001344 Glutamyl-tRNA synthetase n=4 Tax_Id=869250 [Theileria orientalis strain Shintoku]	Translation
J4CE14	83	54809	2	2	2	2	0.12	tr|J4CE14|TOT_040000473 Vacuolar ATP synthase subunit beta n=4 Tax_Id=869250 [Theileria orientalis strain Shintoku]	Cellular organisation and transport
U6GAT9	83	44816	2	1	2	1	0.07	tr|U6GAT9|EAH_00024000 GTP binding protein, putative n=3 Tax_Id=5801 [Eimeria acervulina]	Cellular organisation and transport
J4DAN7	82	58135	3	1	3	1	0.06	tr|J4DAN7|TOT_040000476 Uncharacterized protein n=4 Tax_Id=869250 [Theileria orientalis strain Shintoku]	Uncharacterised protein
J4DPL1	81	19390	3	3	2	2	0.37	tr|J4DPL1|TOT_030000155 40S ribosomal protein S19 n=4 Tax_Id=869250 [Theileria orientalis strain Shintoku]	Translation
J4CC91	81	17139	4	1	4	1	0.2	tr|J4CC91|TOT_010000447 Ribosomal protein S15 n=4 Tax_Id=869250 [Theileria orientalis strain Shintoku]	Translation
J4DPH0	81	206141	1	1	1	1	0.02	tr|J4DPH0|TOT_020000943 Uncharacterized protein n=4 Tax_Id=869250 [Theileria orientalis strain Shintoku]	Uncharacterised protein
L0B0V2	80	24071	3	2	2	1	0.14	tr|L0B0V2|BEWA_008940 40S ribosomal protein S3, putative n=3 Tax_Id=1537102 [Babesia equi strain WA]	Translation
J7MGZ9	80	41975	5	1	4	1	0.08	tr|J7MGZ9|TOT_040000793 Uncharacterized protein n=4 Tax_Id=869250 [Theileria orientalis strain Shintoku]	Uncharacterised protein
J7M851	80	100822	6	3	5	3	0.1	tr|J7M851|TOT_010000091 Protein transport protein sec24-like n=4 Tax_Id=869250 [Theileria orientalis strain Shintoku]	Cellular organisation and transport
J4C7J5	80	128114	7	4	6	4	0.11	tr|J4C7J5|TOT_010000609 Uncharacterized protein n=4 Tax_Id=869250 [Theileria orientalis strain Shintoku]	Uncharacterised protein
J4C877	79	164932	3	2	3	2	0.04	tr|J4C877|TOT_020000567 Pyrophosphate--fructose 6-phosphate 1-phosphotransferase subunit alpha n=4 Tax_Id=869250 [Theileria orientalis strain Metabolism - Glycolysis	Metabolism
J7MGT5	79	20337	2	1	2	1	0.16	tr|J7MGT5|TOT_010001224 DNA-directed RNA polymerase II n=4 Tax_Id=869250 [Theileria orientalis strain Shintoku]	Transcription, regulation and signalling
J4DNS1	77	96705	5	2	5	2	0.07	tr|J4DNS1|TOT_010000904 Threonyl-tRNA synthetase n=4 Tax_Id=869250 [Theileria orientalis strain Shintoku]	Translation
J4DNY2	77	50582	2	1	2	1	0.06	tr|J4DNY2|TOT_020000025 Histone deacetylase n=4 Tax_Id=869250 [Theileria orientalis strain Shintoku]	Transcription, regulation and signalling
J4DPY9	77	11655	2	1	2	1	0.29	tr|J4DPY9|TOT_030000797 Uncharacterized protein n=4 Tax_Id=869250 [Theileria orientalis strain Shintoku]	Uncharacterised protein
J4C8Y8	77	104039	7	4	7	4	0.13	tr|J4C8Y8|TOT_030000877 Uncharacterized protein n=4 Tax_Id=869250 [Theileria orientalis strain Shintoku]	Uncharacterised protein
J9HXP0	75	397652	9	2	5	1	0.01	tr|J9HXP0|OXYTRI_14617 Uncharacterized protein n=2 Tax_Id=94289 [Oxytricha trifallax]	Uncharacterised protein
J4C850	75	61274	1	1	1	1	0.05	tr|J4C850|TOT_020000435 Transducin beta-like protein 1 n=4 Tax_Id=869250 [Theileria orientalis strain Shintoku]	Transcription, regulation and signalling
J4C8H0	74	60304	1	1	1	1	0.05	tr|J4C8H0|TOT_030000035 Uncharacterized protein n=4 Tax_Id=869250 [Theileria orientalis strain Shintoku]	Uncharacterised protein
J4DAS7	74	63857	6	2	4	2	0.11	tr|J4DAS7|TOT_040000535 Uncharacterized protein n=4 Tax_Id=869250 [Theileria orientalis strain Shintoku]	Uncharacterised protein
J4CDN3	74	56791	2	1	2	1	0.06	tr|J4CDN3|TOT_030000942 Uncharacterized protein n=4 Tax_Id=869250 [Theileria orientalis strain Shintoku]	Uncharacterised protein
Q4UEX3	73	46905	5	1	4	1	0.07	tr|Q4UEX3|TA14185 ATP-dependent RNA helicase, putative n=4 Tax_Id=5874 [Theileria annulata]	Transcription, regulation and signalling
J4C831	72	46139	3	2	2	1	0.07	tr|J4C831|TOT_020001005 Uncharacterized protein n=4 Tax_Id=869250 [Theileria orientalis strain Shintoku]	Uncharacterised protein
J7MH27	72	44404	4	3	4	3	0.24	tr|J7MH27|TOT_040000986 Adenylosuccinate synthetase n=4 Tax_Id=869250 [Theileria orientalis strain Shintoku]	Metabolism
J4DNY6	71	14788	4	2	4	2	0.51	tr|J4DNY6|TOT_020000045 40S ribosomal protein S15A n=4 Tax_Id=869250 [Theileria orientalis strain Shintoku]	Translation
J4C8U6	71	183316	2	1	2	1	0.02	tr|J4C8U6|TOT_030000665 DNA-directed RNA polymerase n=4 Tax_Id=869250 [Theileria orientalis strain Shintoku]	Transcription, regulation and signalling
J4DP33	71	18009	6	3	4	3	0.67	tr|J4DP33|TOT_020000276 40S ribosomal protein S11 n=4 Tax_Id=869250 [Theileria orientalis strain Shintoku]	Translation
J7MF86	71	17191	7	3	6	3	0.71	tr|J7MF86|TOT_040000882 40S ribosomal protein S15 n=4 Tax_Id=869250 [Theileria orientalis strain Shintoku]	Translation
J4CCL1	70	26742	4	2	3	2	0.26	tr|J4CCL1|TOT_010001036 Translation elongation factor E1-F beta n=4 Tax_Id=869250 [Theileria orientalis strain Shintoku]	Translation
U6L574	69	9155	2	1	2	1	0.38	tr|U6L574|ETH_00009240 Uncharacterized protein n=3 Tax_Id=5802 [Eimeria tenella]	Uncharacterised protein
J4D5W3	69	46681	1	1	1	1	0.07	tr|J4D5W3|TOT_010000670 Succinyl-Coa ligase, subunit n=4 Tax_Id=869250 [Theileria orientalis strain Shintoku]	Metabolism
J4DQ57	69	11362	3	2	3	2	0.7	tr|J4DQ57|TOT_040000254 Histone H4 n=3 Tax_Id=869250 [Theileria orientalis strain Shintoku]	DNA replication and repair
J4DP35	68	11847	3	2	3	2	0.66	tr|J4DP35|TOT_020000286 60S ribosomal protein L30 n=4 Tax_Id=869250 [Theileria orientalis strain Shintoku]	Translation
J4C3Q2	67	44700	3	2	3	2	0.15	tr|J4C3Q2|TOT_030000900 Adenylosuccinate lyase n=4 Tax_Id=869250 [Theileria orientalis strain Shintoku]	Metabolism
J4CCD7	66	14441	1	1	1	1	0.23	tr|J4CCD7|TOT_010000672 60S ribosomal protein L14 n=4 Tax_Id=869250 [Theileria orientalis strain Shintoku]	Translation
L1LDE0	66	16176	1	1	1	1	0.21	tr|L1LDE0|BEWA_052480 40S ribosomal protein S23, putative n=3 Tax_Id=1537102 [Babesia equi strain WA]	Translation
A0A078BBP8	65	410811	26	1	4	1	0.01	tr|A0A078BBP8|Contig18262.g19410 Uncharacterized protein n=2 Tax_Id=5949 [Stylonychia lemnae]	Uncharacterised protein
G0QLR5	64	102065	1	1	1	1	0.03	tr|G0QLR5|IMG5_035110 Kinesin motor domain protein n=3 Tax_Id=857967 [Ichthyophthirius multifiliis (strain G5)]	Cellular organisation and transport
J4D9G8	63	129253	3	1	3	1	0.03	tr|J4D9G8|TOT_030000637 Splicing factor subunit n=4 Tax_Id=869250 [Theileria orientalis strain Shintoku]	Transcription, regulation and signalling
J4C8I7	63	254134	7	1	4	1	0.01	tr|J4C8I7|TOT_030000120 U5 small nuclear ribonucleoprotein-specific helicase n=4 Tax_Id=869250 [Theileria orientalis strain Shintoku]	Transcription, regulation and signalling
XP_008625271.1	63	146679	3	2	2	1	0.02	ref|XP_008625271.1| hypothetical protein YYE_03400 n=2 Tax_Id=54757 [Plasmodium vinckei vinckei]	Uncharacterised protein
J4C2S3	63	182198	5	1	5	1	0.02	tr|J4C2S3|TOT_010000651 Coatamer subunit beta n=4 Tax_Id=869250 [Theileria orientalis strain Shintoku]	Cellular organisation and transport
A5KAG6	63	96202	5	1	4	1	0.03	tr|A5KAG6|PVX_000595 Uncharacterized protein n=3 Tax_Id=126793 [Plasmodium vivax (strain Salvador I)]	Uncharacterised protein
U6H397	63	21579	1	1	1	1	0.16	tr|U6H397|EPH_0023400 Uncharacterized protein n=3 Tax_Id=51316 [Eimeria praecox]	Uncharacterised protein
B3L5T4	63	135289	2	1	2	1	0.02	tr|B3L5T4|PKH_094540 Putative uncharacterized protein n=4 Tax_Id=5851 [Plasmodium knowlesi (strain H)]	Uncharacterised protein
J4DPA6	63	41310	6	2	6	2	0.17	tr|J4DPA6|TOT_020001075 Uncharacterized protein n=4 Tax_Id=869250 [Theileria orientalis strain Shintoku]	Uncharacterised protein
J4D675	63	122856	1	1	1	1	0.03	tr|J4D675|TOT_010000846 DNA polymerase n=4 Tax_Id=869250 [Theileria orientalis strain Shintoku]	DNA replication and repair
J4C8A1	62	86003	5	1	4	1	0.04	tr|J4C8A1|TOT_020000684 Protein transport protein n=4 Tax_Id=869250 [Theileria orientalis strain Shintoku]	Cellular organisation and transport
J4CDL9	62	55128	4	1	4	1	0.06	tr|J4CDL9|TOT_030000634 Uncharacterized protein n=4 Tax_Id=869250 [Theileria orientalis strain Shintoku]	Uncharacterised protein
J4C373	62	125678	1	1	1	1	0.03	tr|J4C373|TOT_020000212 Uncharacterized protein n=4 Tax_Id=869250 [Theileria orientalis strain Shintoku]	Uncharacterised protein
Q4UCR5	62	20853	3	1	2	1	0.16	tr|Q4UCR5|TA05445 Ribosomal protein L19 n=4 Tax_Id=5874 [Theileria annulata]	Translation
A0DUV2	62	245107	3	1	2	1	0.01	tr|A0DUV2|GSPATT00020481001 Chromosome undetermined scaffold_65, whole genome shotgun sequence n=3 Tax_Id=5888 [Paramecium tetraurelia]	Uncharacterised protein
J4DAI3	61	141390	4	1	4	1	0.02	tr|J4DAI3|TOT_040000900 Importin-alpha n=4 Tax_Id=869250 [Theileria orientalis strain Shintoku]	Cellular organisation and transport
A0EAV2	61	49396	3	1	3	1	0.07	tr|A0EAV2|GSPATT00025153001 Chromosome undetermined scaffold_87, whole genome shotgun sequence n=3 Tax_Id=5888 [Paramecium tetraurelia]	Uncharacterised protein
J4D7V7	61	93181	4	2	3	1	0.04	tr|J4D7V7|TOT_020000652 Citrate synthase n=4 Tax_Id=869250 [Theileria orientalis strain Shintoku]	Metabolism
J4C8N7	61	204356	1	1	1	1	0.02	tr|J4C8N7|TOT_030000371 Clathrin heavy chain n=4 Tax_Id=869250 [Theileria orientalis strain Shintoku]	Cellular organisation and transport
J4C9B8	61	83798	7	2	6	2	0.08	tr|J4C9B8|TOT_040000632 Eukaryotic translation initiation factor 3 subunit B n=4 Tax_Id=869250 [Theileria orientalis strain Shintoku]	Translation
J4C7J6	61	44459	3	1	3	1	0.07	tr|J4C7J6|TOT_010000614 Glycerophosphoryl diester phosphodiesterase n=4 Tax_Id=869250 [Theileria orientalis strain Shintoku]	Metabolism
A0A078B537	60	135108	1	1	1	1	0.02	tr|A0A078B537|Contig2037.g2201 Uncharacterized protein n=2 Tax_Id=5949 [Stylonychia lemnae]	Uncharacterised protein
EfaB_PLUS_40565.g2565	60	44904	2	1	1	1	0.07	eupathdb|EfaB_PLUS_40565.g2565|unspecified product n=1 Tax_Id=84963 [Eimeria falciformis Bayer Haberkorn 1970]	Uncharacterised protein
G0QQM9	60	49675	9	2	1	1	0.07	tr|G0QQM9|IMG5_081390 Myb-like DNA-binding domain protein n=3 Tax_Id=857967 [Ichthyophthirius multifiliis (strain G5)]	Transcription, regulation and signalling
J7MGV8	60	8347	2	2	2	2	1.02	tr|J7MGV8|TOT_040000684 Thioredoxin n=4 Tax_Id=869250 [Theileria orientalis strain Shintoku]	Homeostasis
J4CCV2	60	14787	1	1	1	1	0.23	tr|J4CCV2|TOT_020000304 Ribosomal protein L23 n=4 Tax_Id=869250 [Theileria orientalis strain Shintoku]	Translation
I7M866	59	107725	1	1	1	1	0.03	tr|I7M866|TTHERM_00334380 Uncharacterized protein n=3 Tax_Id=312017 [Tetrahymena thermophila (strain SB210)]	Uncharacterised protein
U6KN91	59	130571	11	2	2	1	0.02	tr|U6KN91|ETH_00024950 Uncharacterized protein n=3 Tax_Id=5802 [Eimeria tenella]	Uncharacterised protein
J4C8J4	59	15635	5	2	5	2	0.48	tr|J4C8J4|TOT_030000154 40S ribosomal protein S12 n=4 Tax_Id=869250 [Theileria orientalis strain Shintoku]	Translation
I7IQL9	59	60777	3	1	2	1	0.05	tr|I7IQL9|BBM_II03725 Chromosome II, complete genome n=3 Tax_Id=1133968 [Babesia microti strain RI]	Uncharacterised protein
J4C344	58	30451	2	1	1	1	0.11	tr|J4C344|TOT_020000067 60S ribosomal protein L7a n=4 Tax_Id=869250 [Theileria orientalis strain Shintoku]	Translation
J4D7N2	58	54807	3	1	3	1	0.06	tr|J4D7N2|TOT_020000535 Nucleolar protein Nop5 n=4 Tax_Id=869250 [Theileria orientalis strain Shintoku]	Transcription, regulation and signalling
J7MCG4	58	21709	5	1	5	1	0.15	tr|J7MCG4|TOT_040000865 Peroxiredoxin 1 n=4 Tax_Id=869250 [Theileria orientalis strain Shintoku]	Homeostasis
J4CCG7	57	95058	2	1	2	1	0.03	tr|J4CCG7|TOT_010000819 Uncharacterized protein n=4 Tax_Id=869250 [Theileria orientalis strain Shintoku]	Uncharacterised protein
Q4N7R3	57	24099	7	1	6	1	0.14	tr|Q4N7R3|TP01_0757 GTP-binding nuclear protein ran, putative n=4 Tax_Id=5875 [Theileria parva]	Cellular organisation and transport
J4CD13	57	15669	5	1	5	1	0.22	tr|J4CD13|TOT_020000601 Histone H2A n=3 Tax_Id=869250 [Theileria orientalis strain Shintoku]	DNA replication and repair
J4C360	57	148135	5	2	5	2	0.04	tr|J4C360|TOT_020000148 Coatomer complex subunit alpha n=4 Tax_Id=869250 [Theileria orientalis strain Shintoku]	Cellular organisation and transport
B6AIG2	57	48314	2	1	1	1	0.07	tr|B6AIG2|CMU_031440 Eukaryotic peptide chain release factor subunit 1, putative n=4 Tax_Id=441375 [Cryptosporidium muris (strain RN66)]	Translation
U6LYN7	57	55354	2	1	2	1	0.06	tr|U6LYN7|EMWEY_00005140 Inosine-5'-monophosphate dehydrogenase n=3 Tax_Id=5804 [Eimeria maxima]	Metabolism
J4C7Z3	57	141037	2	1	2	1	0.02	tr|J4C7Z3|TOT_020000160 Uncharacterized protein n=4 Tax_Id=869250 [Theileria orientalis strain Shintoku]	Uncharacterised protein
J4C7R5	56	109290	4	1	4	1	0.03	tr|J4C7R5|TOT_010000953 Alanine--tRNA ligase n=4 Tax_Id=869250 [Theileria orientalis strain Shintoku]	Translation
J9ISV7	56	31893	3	1	1	1	0.1	tr|J9ISV7|OXYTRI_24179 Uncharacterized protein n=2 Tax_Id=94289 [Oxytricha trifallax]	Uncharacterised protein
J4C424	56	145660	3	1	3	1	0.02	tr|J4C424|TOT_030000702 Uncharacterized protein n=4 Tax_Id=869250 [Theileria orientalis strain Shintoku]	Uncharacterised protein
J7MEL8	56	23158	2	1	2	1	0.14	tr|J7MEL8|TOT_010000107 Peptidyl-prolyl cis-trans isomerase n=4 Tax_Id=869250 [Theileria orientalis strain Shintoku]	Protein processing and turnover
J4C335	56	45539	1	1	1	1	0.07	tr|J4C335|TOT_020000024 Vacuolar ATP synthase n=4 Tax_Id=869250 [Theileria orientalis strain Shintoku]	Cellular organisation and transport
J7M876	55	104815	3	1	3	1	0.03	tr|J7M876|TOT_010000131 Histidyl-tRNA synthetase n=4 Tax_Id=869250 [Theileria orientalis strain Shintoku]	Translation
CON_O77727	55	48740	24	2	5	2	0.14	sp|CON_O77727|Keratin, type I cytoskeletal 15 OS=Ovis aries GN=KRT15 PE=2 SV=1 Tax_Id=9940 [Ovis aries]	Contaminant
J4CDE2	54	44019	2	1	2	1	0.07	tr|J4CDE2|TOT_030000248 GTP-binding protein n=4 Tax_Id=869250 [Theileria orientalis strain Shintoku]	Cellular organisation and transport
Q4UAQ2	54	44713	3	1	3	1	0.07	tr|Q4UAQ2|TA17225 26s protease regulatory subunit, putative n=4 Tax_Id=5874 [Theileria annulata]	Protein processing and turnover
L0AWR6	54	70169	9	1	4	1	0.05	tr|L0AWR6|BEWA_025470 Uncharacterized protein n=3 Tax_Id=1537102 [Babesia equi strain WA]	Uncharacterised protein
J4C927	54	71244	3	1	3	1	0.05	tr|J4C927|TOT_040000923 Uncharacterized protein n=4 Tax_Id=869250 [Theileria orientalis strain Shintoku]	Uncharacterised protein
CON_P02662	54	24513	2	1	2	1	0.14	sp|CON_P02662|Alpha-S1-casein OS=Bos taurus GN=CSN1S1 PE=1 SV=2 Tax_Id=9913 [Bos taurus]	Host protein
L1LDX0	53	175019	3	1	3	1	0.02	tr|L1LDX0|BEWA_036730 Uncharacterized protein n=3 Tax_Id=1537102 [Babesia equi strain WA]	Uncharacterised protein
J4C4F9	53	111871	6	1	5	1	0.03	tr|J4C4F9|TOT_040000489 26S proteasome regulatory subunit n=4 Tax_Id=869250 [Theileria orientalis strain Shintoku]	Protein processing and turnover
A0C6W1	53	172469	5	1	2	1	0.02	tr|A0C6W1|GSPATT00035657001 Chromosome undetermined scaffold_153, whole genome shotgun sequence n=3 Tax_Id=5888 [Paramecium tetraurelia]	Uncharacterised protein
J4C9A9	52	21740	3	1	2	1	0.15	tr|J4C9A9|TOT_040000588 40S ribosomal protein S9 n=4 Tax_Id=869250 [Theileria orientalis strain Shintoku]	Translation
J7MC80	52	20896	1	1	1	1	0.16	tr|J7MC80|TOT_040000710 Uncharacterized protein n=4 Tax_Id=869250 [Theileria orientalis strain Shintoku]	Uncharacterised protein
J9J7H6	52	157108	2	1	1	1	0.02	tr|J9J7H6|OXYTRI_15840 TTL domain containing protein n=2 Tax_Id=94289 [Oxytricha trifallax]	Protein processing and turnover
I7M3Y9	52	152981	9	1	3	1	0.02	tr|I7M3Y9|TTHERM_00238890 Uncharacterized protein n=2 Tax_Id=312017 [Tetrahymena thermophila (strain SB210)]	Uncharacterised protein
J4DQ71	47	56411	3	2	3	2	0.12	tr|J4DQ71|TOT_040000325 Pyruvate kinase n=4 Tax_Id=869250 [Theileria orientalis strain Shintoku]	Metabolism
J4DNL7	52	72328	3	1	3	1	0.05	tr|J4DNL7|TOT_010001282 Uncharacterized protein n=4 Tax_Id=869250 [Theileria orientalis strain Shintoku]	Uncharacterised protein
J9J8Z3	52	48673	1	1	1	1	0.07	tr|J9J8Z3|OXYTRI_02725 Uncharacterized protein n=2 Tax_Id=94289 [Oxytricha trifallax]	Uncharacterised protein
J4CDY1	51	51428	1	1	1	1	0.06	tr|J4CDY1|TOT_040000942 Isocitrate dehydrogenase [NADP] n=4 Tax_Id=869250 [Theileria orientalis strain Shintoku]	Metabolism
J4CCX9	51	30114	4	1	3	1	0.11	tr|J4CCX9|TOT_020000434 Uncharacterized protein n=4 Tax_Id=869250 [Theileria orientalis strain Shintoku]	Uncharacterised protein
A0A078AMX5	51	41626	1	1	1	1	0.08	tr|A0A078AMX5|Contig7759.g8273 Uncharacterized protein n=2 Tax_Id=5949 [Stylonychia lemnae]	Uncharacterised protein
J7M4I8	51	115287	1	1	1	1	0.03	tr|J7M4I8|TOT_010000078 Protein phosphatase 2A regulatory subunit B n=4 Tax_Id=869250 [Theileria orientalis strain Shintoku]	Protein processing and turnover
XP_001014423.1	51	184023	4	1	4	1	0.02	ref|XP_001014423.1| hypothetical protein TTHERM_00522450 n=2 Tax_Id=5911 [Tetrahymena thermophila]	Uncharacterised protein
J7M4M9	51	109102	5	1	5	1	0.03	tr|J7M4M9|TOT_040000683 Importin beta/transportin n=4 Tax_Id=869250 [Theileria orientalis strain Shintoku]	Cellular organisation and transport
J4C8X8	50	40146	4	1	4	1	0.08	tr|J4C8X8|TOT_030000826 Uncharacterized protein n=4 Tax_Id=869250 [Theileria orientalis strain Shintoku]	Uncharacterised protein
J7MET5	50	22263	4	1	3	1	0.15	tr|J7MET5|TOT_010000187 60S ribosomal protein L13 n=4 Tax_Id=869250 [Theileria orientalis strain Shintoku]	Translation
J4C385	50	60840	3	1	3	1	0.05	tr|J4C385|TOT_020000268 T-complex protein 1 epsilon subunit n=4 Tax_Id=869250 [Theileria orientalis strain Shintoku]	Protein processing and turnover
Q9BIG6	50	42261	4	2	4	2	0.16	tr|Q9BIG6|Actin I Tax_Id=134027 [Diophrys sp. PPR2000]	Cellular organisation and transport
J9EDS4	49	181482	3	1	2	1	0.02	tr|J9EDS4|OXYTRI_24815 Uncharacterized protein n=2 Tax_Id=94289 [Oxytricha trifallax]	Uncharacterised protein
J4DA96	49	51214	4	1	4	1	0.06	tr|J4DA96|TOT_040000205 Branched-chain alpha-keto acid dehydrogenase E1 n=4 Tax_Id=869250 [Theileria orientalis strain Shintoku]	Protein processing and turnover
J4C3S6	49	217399	1	1	1	1	0.01	tr|J4C3S6|TOT_030000217 mRNA transport factor n=4 Tax_Id=869250 [Theileria orientalis strain Shintoku]	Cellular organisation and transport
J4CCQ0	49	22010	1	1	1	1	0.15	tr|J4CCQ0|TOT_020000048 Uncharacterized protein n=4 Tax_Id=869250 [Theileria orientalis strain Shintoku]	Uncharacterised protein
J4C876	48	98791	3	1	3	1	0.03	tr|J4C876|TOT_020000562 Uncharacterized protein n=4 Tax_Id=869250 [Theileria orientalis strain Shintoku]	Uncharacterised protein
L1LF98	48	14746	2	1	2	1	0.23	tr|L1LF98|BEWA_041500 60S ribosomal protein L35, putative n=3 Tax_Id=1537102 [Babesia equi strain WA]	Translation
J4CDS5	48	60685	3	1	3	1	0.05	tr|J4CDS5|TOT_040000033 Importin subunit alpha n=4 Tax_Id=869250 [Theileria orientalis strain Shintoku]	Cellular organisation and transport
U6LMN4	48	10414	3	1	1	1	0.33	tr|U6LMN4|EBH_0034410 Uncharacterized protein n=3 Tax_Id=51314 [Eimeria brunetti]	Uncharacterised protein
I7J9A9	47	74641	4	1	4	1	0.04	tr|I7J9A9|BBM_III08040 Chromosome III, complete sequence n=3 Tax_Id=1133968 [Babesia microti strain RI]	Uncharacterised protein
J4C8T9	47	54858	9	3	6	2	0.12	tr|J4C8T9|TOT_030000630 Inosine-5'-monophosphate dehydrogenase n=4 Tax_Id=869250 [Theileria orientalis strain Shintoku]	Metabolism
J4C8F5	46	51518	4	1	4	1	0.06	tr|J4C8F5|TOT_020000952 Metalloprotease n=4 Tax_Id=869250 [Theileria orientalis strain Shintoku]	Protein processing and turnover
XP_001025661.1	46	34139	2	1	2	1	0.1	ref|XP_001025661.1| oxidoreductase, aldo/keto reductase family protein n=2 Tax_Id=5911 [Tetrahymena thermophila]	Metabolism
J4C7H5	46	20049	2	1	2	1	0.17	tr|J4C7H5|TOT_010000511 Uncharacterized protein n=4 Tax_Id=869250 [Theileria orientalis strain Shintoku]	Uncharacterised protein
J9IKJ2	46	207488	7	1	2	1	0.02	tr|J9IKJ2|OXYTRI_03226 Putative ankyrin 2,3/unc44 n=2 Tax_Id=94289 [Oxytricha trifallax]	Transcription, regulation and signalling
A0CIY4	46	189740	4	1	4	1	0.02	tr|A0CIY4|GSPATT00007886001 Chromosome undetermined scaffold_19, whole genome shotgun sequence n=3 Tax_Id=5888 [Paramecium tetraurelia]	Uncharacterised protein
I7M0G3	46	125380	2	1	2	1	0.03	tr|I7M0G3|TTHERM_00069280 Uncharacterized protein n=2 Tax_Id=312017 [Tetrahymena thermophila (strain SB210)]	Uncharacterised protein
J7M864	45	76433	1	1	1	1	0.04	tr|J7M864|TOT_010001210 Long-chain-fatty-acid--CoA ligase n=4 Tax_Id=869250 [Theileria orientalis strain Shintoku]	Metabolism
A0BTN9	45	50828	16	8	1	1	0.06	tr|A0BTN9|GSPATT00032138001 Chromosome undetermined scaffold_127, whole genome shotgun sequence n=3 Tax_Id=5888 [Paramecium tetraurelia]	Uncharacterised protein
L1LFE7	45	88465	4	1	3	1	0.04	tr|L1LFE7|BEWA_041190 Cell division cycle protein 48, putative n=3 Tax_Id=1537102 [Babesia equi strain WA]	Cell division
L0AYW4	45	16436	2	1	2	1	0.21	tr|L0AYW4|BEWA_032710 40s ribosomal protein S16, putative n=3 Tax_Id=1537102 [Babesia equi strain WA]	Translation
G0QMM0	44	36206	1	1	1	1	0.09	tr|G0QMM0|IMG5_049990 Putative uncharacterized protein n=3 Tax_Id=857967 [Ichthyophthirius multifiliis (strain G5)]	Uncharacterised protein
557164691	44	62058	1	1	1	1	0.05	gi|557164691|emb|CDJ65741.1| hypothetical protein, conserved, partial n=2 Tax_Id=51315 [Eimeria necatrix]	Uncharacterised protein
XP_001029961.1	44	385514	8	1	7	1	0.01	ref|XP_001029961.1| IP3 receptor calcium ion channel protein n=2 Tax_Id=5911 [Tetrahymena thermophila]	Cellular organisation and transport
S6BA39	44	40489	2	1	1	1	0.08	tr|S6BA39|BBOV_III009700 Membrane protein, putative n=2 Tax_Id=5865 [Babesia bovis]	Cellular organisation and transport
J4DA68	44	31345	2	1	2	1	0.11	tr|J4DA68|TOT_040000181 40S ribosomal protein SA n=4 Tax_Id=869250 [Theileria orientalis strain Shintoku]	Translation
A0CT98	43	252495	2	1	2	1	0.01	tr|A0CT98|GSPATT00010249001 Chromosome undetermined scaffold_27, whole genome shotgun sequence n=3 Tax_Id=5888 [Paramecium tetraurelia]	Uncharacterised protein
J4D6K7	43	51018	6	1	6	1	0.06	tr|J4D6K7|TOT_010001094 Aspartyl aminopeptidase n=4 Tax_Id=869250 [Theileria orientalis strain Shintoku]	Protein processing and turnover
Q00GM5	43	46588	1	1	1	1	0.07	tr|Q00GM5|FBAII Plastid fructose-1,6-bisphosphate aldolase class II protein n=2 Tax_Id=156230 [Karenia brevis]	Metabolism
J4CD27	43	16904	2	2	1	1	0.2	tr|J4CD27|TOT_020000669 Calmodulin n=4 Tax_Id=869250 [Theileria orientalis strain Shintoku]	Transcription, regulation and signalling
U6LQB4	42	189699	2	1	2	1	0.02	tr|U6LQB4|EBH_0029940 Protein phosphatase 2C, putative n=3 Tax_Id=51314 [Eimeria brunetti]	Transcription, regulation and signalling
A0A086PKW3	42	97530	1	1	1	1	0.03	tr|A0A086PKW3|TGVAND_297720A Trehalose-phosphatase n=2 Tax_Id=933077 [Toxoplasma gondii VAND]	Homeostasis
A0A086L915	42	231730	1	1	1	1	0.01	tr|A0A086L915|TGFOU_299100 Uncharacterized protein n=4 Tax_Id=943167 [Toxoplasma gondii FOU]	Uncharacterised protein
J4C3L8	41	43993	1	1	1	1	0.07	tr|J4C3L8|TOT_020000920 26S proteasome ATPase subunit n=4 Tax_Id=869250 [Theileria orientalis strain Shintoku]	Protein processing and turnover
A0A081I9Y4	41	443981	5	1	4	1	0.01	tr|A0A081I9Y4|YYE_04676 Uncharacterized protein n=3 Tax_Id=54757 [Plasmodium vinckei vinckei]	Uncharacterised protein
A0A077TPM3	41	162489	11	1	2	1	0.02	tr|A0A077TPM3|PCHAS_122920 Sentrin-specific protease 2, putative n=3 Tax_Id=31271 [Plasmodium chabaudi chabaudi]	Protein processing and turnover
C5L9V1	41	29044	1	1	1	1	0.11	tr|C5L9V1|Pmar_PMAR018862 Putative uncharacterized protein n=3 Tax_Id=423536 [Perkinsus marinus (strain ATCC 50983 / TXsc)]	Uncharacterised protein
Q4N0Z4	40	13464	7	1	4	1	0.25	tr|Q4N0Z4|TP03_0603 60S ribosomal protein L35a, putative n=4 Tax_Id=5875 [Theileria parva]	Translation
G0QPN7	40	21303	18	1	3	1	0.16	tr|G0QPN7|IMG5_069880 Putative uncharacterized protein n=3 Tax_Id=857967 [Ichthyophthirius multifiliis (strain G5)]	Uncharacterised protein
J4DNG9	39	82567	1	1	1	1	0.04	tr|J4DNG9|TOT_010000404 Glycyl-tRNA synthetase n=4 Tax_Id=869250 [Theileria orientalis strain Shintoku]	Translation
A0A078AL32	38	158635	2	1	2	1	0.02	tr|A0A078AL32|Contig15326.g16330 Uncharacterized protein n=2 Tax_Id=5949 [Stylonychia lemnae]	Uncharacterised protein
A0A078AWF3	38	67496	3	1	3	1	0.05	tr|A0A078AWF3|Contig17193.g18313 Uncharacterized protein n=2 Tax_Id=5949 [Stylonychia lemnae]	Uncharacterised protein
A0EHV2	38	46266	1	1	1	1	0.07	tr|A0EHV2|GSPATT00027220001 Chromosome undetermined scaffold_98, whole genome shotgun sequence n=3 Tax_Id=5888 [Paramecium tetraurelia]	Uncharacterised protein
A0A086LZB8	38	332508	3	1	2	1	0.01	tr|A0A086LZB8|TGRUB_202490 AP2 domain transcription factor AP2VIIa-7 n=2 Tax_Id=935652 [Toxoplasma gondii RUB]	Transcription, regulation and signalling
U6LMC4	37	152174	12	1	2	1	0.02	tr|U6LMC4|EBH_0068020 Uncharacterized protein n=3 Tax_Id=51314 [Eimeria brunetti]	Uncharacterised protein
J4D9E4	37	51198	1	1	1	1	0.06	tr|J4D9E4|TOT_030000588 Uncharacterized protein n=4 Tax_Id=869250 [Theileria orientalis strain Shintoku]	Uncharacterised protein
A0A086KBG3	36	16978	2	1	1	1	0.2	tr|A0A086KBG3|TGDOM2_363040 Uncharacterized protein n=3 Tax_Id=1130820 [Toxoplasma gondii GAB2-2007-GAL-DOM2]	Uncharacterised protein
J4CCF6	36	39862	2	1	2	1	0.08	tr|J4CCF6|TOT_010000766 ADP-ribosylation factor GTPase activating protein n=4 Tax_Id=869250 [Theileria orientalis strain ShintIntracellular transport	Cellular organisation and transport
B3LBA0	35	169080	3	1	3	1	0.02	tr|B3LBA0|PKH_131020 Putative uncharacterized protein n=4 Tax_Id=5851 [Plasmodium knowlesi (strain H)]	Uncharacterised protein
EfaB_PLUS_23210.g1942	35	84246	6	1	2	1	0.04	eupathdb|EfaB_PLUS_23210.g1942|unspecified product n=1 Tax_Id=84963 [Eimeria falciformis Bayer Haberkorn 1970]	Uncharacterised protein
A0A081I9J4	34	294328	2	1	1	1	0.01	tr|A0A081I9J4|YYE_04863 Uncharacterized protein n=3 Tax_Id=54757 [Plasmodium vinckei vinckei]	Uncharacterised protein
J7M4P3	33	13225	3	1	2	1	0.26	tr|J7M4P3|TOT_040000737 40S ribosomal protein S20 n=4 Tax_Id=869250 [Theileria orientalis strain Shintoku]	Translation
U6KM17	30	285614	2	1	2	1	0.01	tr|U6KM17|ETH_00029545 Uncharacterized protein n=3 Tax_Id=5802 [Eimeria tenella]	Uncharacterised protein
B1B3Q3	27	83146	4	1	1	1	0.04	tr|B1B3Q3|scf1 Putative uncharacterized protein scf1 n=2 Tax_Id=164621 [Sorogena stoianovitchae]	Uncharacterised protein
A0A061D618	23	192039	3	1	1	1	0.02	tr|A0A061D618|BBBOND_0300560 Uncharacterized protein n=2 Tax_Id=5866 [Babesia bigemina]	Uncharacterised protein
U6GFC2	19	300151	26	2	4	1	0.01	tr|U6GFC2|EAH_00004580 Amine oxidase, flavin-containing domain-containing protein, putative n=3 Tax_Id=5801 [Eimeria acervulina]	Metabolism
L1LBJ7	17	87526	11	1	2	1	0.04	tr|L1LBJ7|BEWA_050160 Translation initiation factor IF-2, putative n=3 Tax_Id=1537102 [Babesia equi strain WA]	Translation
XP_001388296.1	16	150953	3	1	3	1	0.02	ref|XP_001388296.1| hypothetical protein n=3 Tax_Id=353152 [Cryptosporidium parvum Iowa II]	Uncharacterised protein
U6MY62	16	76133	33	2	2	1	0.04	tr|U6MY62|ENH_00038060 TPR domain-containing protein, putative n=3 Tax_Id=51315 [Eimeria necatrix]	Protein processing and turnover
A0A023AXQ0	15	41714	2	1	2	1	0.08	tr|A0A023AXQ0|GNI_173270 Uncharacterized protein n=3 Tax_Id=110365 [Gregarina niphandrodes]	Uncharacterised protein
A0A061D8N1	14	203157	12	3	4	1	0.02	tr|A0A061D8N1|BBBOND_0307920 Uncharacterized protein n=2 Tax_Id=5866 [Babesia bigemina]	Uncharacterised protein
Chitose detergent
Accession	Score	Mass	Num. of matches	No of signif matches	No of seqs	No of signif seqs	emPAI	Description	Comments
Vbra_21106	80	41871	6	2	4	2	0.16	eupathdb|Vbra_21106|Actin, putative n=1 Tax_Id=1169540 [Vitrella brassicaformis CCMP3155]	Cellular organisation and transport
13774290	85	40681	8	3	3	2	0.17	gi|13774290|gb|AAK38829.1| actin II Tax_Id=134027 [Diophrys sp. PPR2000]	Cellular organisation and transport
21429686	92	43645	17	4	8	2	0.16	gi|21429686|gb|AAM50062.1| alpha-tubulin Tax_Id=77619 [Vorticella microstoma]	Cellular organisation and transport
62431863	61	22931	4	2	2	2	0.31	gi|62431863|gb|AAX82876.1| actin, partial n=1 Tax_Id=32597 [Perkinsus olseni]	Cellular organisation and transport
Q8GZE2	55	41696	8	1	6	1	0.08	tr|Q8GZE2|Q8GZE2_PYRLU Actin n=2 Tax_Id=2972 [Pyrocystis lunula]	Cellular organisation and transport
Vbra_12830	45	49525	1	1	1	1	0.07	eupathdb|Vbra_12830|Hypothetical protein n=1 Tax_Id=1169540 [Vitrella brassicaformis CCMP3155]	Uncharacterised protein
XP_001031579.1	59	168702	1	1	1	1	0.02	ref|XP_001031579.1| hypothetical protein TTHERM_00773260 n=1 Tax_Id=5911 [Tetrahymena thermophila]	Uncharacterised protein
Cvel_24443	57	24175	3	2	1	1	0.14	eupathdb|Cvel_24443|Hypothetical protein n=1 Tax_Id=1169474 [Chromera velia CCMP2878]	Uncharacterised protein
A0A086M4E7	45	205955	1	1	1	1	0.02	tr|A0A086M4E7|TGRUB_232180 A0A086M4E7_TOXGO UBA/TS-N domain-containing protein n=2 Tax_Id=935652 [Toxoplasma gondii RUB]	Uncharacterised protein
110644985	64	34758	4	2	2	1	0.1	gi|110644985|gb|ABG81328.1| beta-tubulin n=1 Tax_Id=70075 [Nyctotherus ovalis]	Cellular organisation and transport
A0DHL1	65	57053	5	1	4	1	0.06	tr|A0DHL1|GSPATT00016915001 A0DHL1_PARTE ATP synthase subunit alpha n=3 Tax_Id=5888 [Paramecium tetraurelia]	Metabolism
A0EB19	48	42222	2	1	2	1	0.08	tr|A0EB19|GSPATT00025220001 A0EB19_PARTE ATP synthase subunit beta n=3 Tax_Id=5888 [Paramecium tetraurelia]	Metabolism
I2FKD9	71	58169	4	2	3	2	0.12	tr|I2FKD9|ATP5B I2FKD9_PLAGA ATP synthase subunit beta n=2 Tax_Id=5849 [Plasmodium gallinaceum]	Metabolism
A0A077ZWA3	43	182979	2	1	1	1	0.02	tr|A0A077ZWA3|Contig10769.g11525 A0A077ZWA3_STYLE Tubulin-tyrosine ligase family n=2 Tax_Id=5949 [Stylonychia lemnae]	Protein processing and turnover
XP_001020177.2	40	45803	1	1	1	1	0.07	ref|XP_001020177.2| Papain family cysteine protease containing protein n=1 Tax_Id=5911 [Tetrahymena thermophila]	Protein processing and turnover
P16019	72	70963	2	1	2	1	0.05	sp|P16019|TA11610 HSP70_THEAN Heat shock 70 kDa protein n=4 Tax_Id=5874 [Theileria annulata]	Homeostasis
Vbra_22283	48	66025	1	1	1	1	0.05	eupathdb|Vbra_22283|Putative purine permease C1399.01c, putative n=1 Tax_Id=1169540 [Vitrella brassicaformis CCMP3155]	Cellular organisation and transport
Vbra_4135	29	54309	7	2	1	1	0.06	eupathdb|Vbra_4135|Wall-associated receptor kinase-like 15, putative n=1 Tax_Id=1169540 [Vitrella brassicaformis CCMP3155]	Protein processing and turnover
A0C832	45	60296	1	1	1	1	0.05	tr|A0C832|GSPATT00036080001 A0C832_PARTE Chromosome undetermined scaffold_157, whole genome shotgun sequence n=3 Tax_Id=5888 [Paramecium tetraurelia]	Uncharacterised protein
A0E2E9	35	69564	2	1	1	1	0.05	tr|A0E2E9|GSPATT00022638001 A0E2E9_PARTE Chromosome undetermined scaffold_75, whole genome shotgun sequence n=3 Tax_Id=5888 [Paramecium tetraurelia]	Uncharacterised protein
A0E7Q2	55	77867	1	1	1	1	0.04	tr|A0E7Q2|GSPATT00024047001 A0E7Q2_PARTE Chromosome undetermined scaffold_81, whole genome shotgun sequence n=3 Tax_Id=5888 [Paramecium tetraurelia]	Uncharacterised protein
G0QQM9	66	49675	2	1	1	1	0.07	tr|G0QQM9|IMG5_081390 G0QQM9_ICHMG Myb-like DNA-binding domain protein n=3 Tax_Id=857967 [Ichthyophthirius multifiliis (strain G5)]	Uncharacterised protein
J4C3M5	33	45773	3	1	2	1	0.07	tr|J4C3M5|TOT_020000955 J4C3M5_THEOR Uncharacterized protein n=4 Tax_Id=869250 [Theileria orientalis strain Shintoku]	Uncharacterised protein
J4C8L6	45	18693	1	1	1	1	0.18	tr|J4C8L6|TOT_030000264 J4C8L6_THEOR Uncharacterized protein n=4 Tax_Id=869250 [Theileria orientalis strain Shintoku]	Uncharacterised protein
J4CDD8	257	33589	23	14	12	6	1.32	tr|J4CDD8|TOT_030000228 J4CDD8_THEOR Uncharacterized protein n=4 Tax_Id=869250 [Theileria orientalis strain Shintoku]	Uncharacterised protein
J9ILS8	53	316527	3	1	1	1	0.01	tr|J9ILS8|OXYTRI_02573 J9ILS8_9SPIT Uncharacterized protein n=2 Tax_Id=1172189 [Oxytricha trifallax]	Uncharacterised protein
L0AX04	33	69065	1	1	1	1	0.05	tr|L0AX04|BEWA_029400 L0AX04_BABEQ Uncharacterized protein n=3 Tax_Id=1537102 [Babesia equi strain WA]	Uncharacterised protein
Q7R8M2	33	101370	3	1	1	1	0.03	tr|Q7R8M2|PY07199 Q7R8M2_PLAYO Uncharacterized protein n=7 Tax_Id=73239 [Plasmodium yoelii yoelii]	Uncharacterised protein
U6M9F1	49	51948	1	1	1	1	0.06	tr|U6M9F1|EMWEY_00014950 U6M9F1_EIMMA Uncharacterized protein n=3 Tax_Id=5804 [Eimeria maxima]	Uncharacterised protein
A0DM04	61	65153	1	1	1	1	0.05	tr|A0DM04|GSPATT00018289001 A0DM04_PARTE Chromosome undetermined scaffold_56, whole genome shotgun sequence n=3 Tax_Id=5888 [Paramecium tetraurelia]	Uncharacterised protein
I7LVR2	46	42704	1	1	1	1	0.08	tr|I7LVR2|TTHERM_00138210 I7LVR2_TETTS Uncharacterized protein n=2 Tax_Id=312017 [Tetrahymena thermophila (strain SB210)]	Uncharacterised protein
L0AU16	31	206141	1	1	1	1	0.02	tr|L0AU16|BEWA_019830 L0AU16_BABEQ Uncharacterized protein n=3 Tax_Id=1537102 [Babesia equi strain WA]	Uncharacterised protein
U6KMT9	29	15726	9	1	1	1	0.21	tr|U6KMT9|EMH_0095730 U6KMT9_9EIME Uncharacterized protein n=3 Tax_Id=44415 [Eimeria mitis]	Uncharacterised protein
1815683	97	29383	23	11	4	2	0.24	gi|1815683|gb|AAB57908.1| 32 kDa immunodominant piroplasm surface antigen Tax_Id=27991 [Theileria mutans]	Host cell attachment and interaction
J4CDK5	62	53548	1	1	1	1	0.06	tr|J4CDK5|TOT_030000565 J4CDK5_THEOR Tocp1 variant tocp4 n=5 Tax_Id=869250 [Theileria orientalis strain Shintoku]	Host cell attachment and interaction
312032268	170	29498	62	21	23	10	2.22	gi|312032268|dbj|BAJ33430.1| major piroplasm surface protein n=1 Tax_Id=68886 [Theileria orientalis]	Host cell attachment and interaction
788433523	264	26922	52	22	20	11	3.03	gi|788433523|gb|AKA43922.1| major piroplasm surface protein, partial n=1 Tax_Id=68886 [Theileria orientalis]	Host cell attachment and interaction
B2LUF8	192	25906	8	7	4	4	0.83	tr|B2LUF8|p23 B2LUF8_9APIC 23 kDa piroplasm surface protein Tax_Id=359401 [Theileria sp. ex Hongan buffalo]	Host cell attachment and interaction
Chitose aqueous
Accession	Score	Mass	Num. of matches	No of signif matches	No of seqs	No of signif seqs	emPAI	Description	Comments
CON_P02070	1005	15944	135	60	49	28	458.31	sp|CON_P02070|Hemoglobin subunit beta OS=Bos taurus GN=HBB PE=1 SV=1 Tax_Id=9913 [Bos taurus]	Host protein
S7VNC9	488	32038	109	40	53	22	8.54	tr|S7VNC9|TGGT1_411760 Actin n=3 Tax_Id=507601 [Toxoplasma gondii GT1]	Cellular organisation and transport
13774290	389	40681	33	16	18	11	1.18	gi|13774290|gb|AAK38829.1| actin II Tax_Id=134027 [Diophrys sp. PPR2000]	Cellular organisation and transport
J4C3M0	241	41969	32	12	23	10	1.13	tr|J4C3M0|TOT_020001102 Actin 1 n=4 Tax_Id=869250 [Theileria orientalis strain Shintoku]	Cellular organisation and transport
B6ACJ8	190	42123	70	19	47	18	2.88	tr|B6ACJ8|CMU_016000 Actin family protein n=4 Tax_Id=441375 [Cryptosporidium muris (strain RN66)]	Cellular organisation and transport
315451457	185	28591	42	11	25	8	1.68	gi|315451457|gb|ADU24806.1| actin n=1 Tax_Id=47934 [Dinophysis acuminata]	Cellular organisation and transport
CON_P01966	473	15175	71	31	38	17	54.47	sp|CON_P01966|Hemoglobin subunit alpha OS=Bos taurus GN=HBA PE=1 SV=2 Tax_Id=9913 [Bos taurus]	Host protein
CON_P00761	372	24394	50	18	10	5	1.15	sp|CON_P00761|Trypsin OS=Sus scrofa PE=1 SV=1 Tax_Id=9823 [Sus scrofa]	Contaminant
110644985	309	34758	41	18	15	6	1.07	gi|110644985|gb|ABG81328.1| beta-tubulin n=1 Tax_Id=70075 [Nyctotherus ovalis]	Cellular organisation and transport
J4CCT6	214	77380	22	8	13	7	1.04	tr|J4CCT6|TOT_020000226 Heat shock protein 90 n=4 Tax_Id=869250 [Theileria orientalis strain Shintoku]	Homeostasis
L0ATY6	203	82435	12	7	7	6	0.26	tr|L0ATY6|BEWA_019520 Heat shock protein 90 HSP90, putative n=3 Tax_Id=1537102 [Babesia equi strain WA]	Homeostasis
G0QRA5	188	81998	4	4	3	3	0.12	tr|G0QRA5|IMG5_091060 Putative uncharacterized protein n=3 Tax_Id=857967 [Ichthyophthirius multifiliis (strain G5)]	Uncharacterised protein
L1LF41	169	49292	16	10	12	7	0.67	tr|L1LF41|BEWA_037990 Elongation factor 1-alpha n=4 Tax_Id=1537102 [Babesia equi strain WA]	Translation
677286259	100	31817	6	5	2	2	0.22	gi|677286259|gb|AIM46987.1| translation elongation factor 1-alpha, partial Tax_Id=1432660 [Colponema edaphicum]	Translation
I7IS74	166	47490	3	3	1	1	0.14	tr|I7IS74|BBM_III05965 Chromosome III, complete sequence n=3 Tax_Id=1133968 [Babesia microti strain RI]	Uncharacterised protein
F0VJQ7	161	51972	6	4	3	2	0.2	tr|F0VJQ7|NCLIV_037500 Putative uncharacterized protein NCLIV_037500 n=4 Tax_Id=572307 [Neospora caninum (strain Liverpool)]	Uncharacterised protein
557243846	151	69961	10	6	10	6	0.32	gi|557243846|emb|CDJ62090.1| Heat shock protein, related, partial n=2 Tax_Id=51315 [Eimeria necatrix]	Homeostasis
111120233	148	70941	12	8	11	8	0.43	gi|111120233|dbj|BAF02623.1| heat shock protein 70 n=1 Tax_Id=5874 [Theileria annulata]	Homeostasis
CON_O77727	151	48740	30	10	7	3	0.3	sp|CON_O77727|Keratin, type I cytoskeletal 15 OS=Ovis aries GN=KRT15 PE=2 SV=1 Tax_Id=9940 [Ovis aries]	Contaminant
134142177	107	43095	26	7	12	6	0.55	gi|134142177|gb|ABO61432.1| alpha tubulin, partial n=1 Tax_Id=2957 [Protodinium simplex]	Cellular organisation and transport
B6AD39	93	50285	12	6	7	5	0.37	tr|B6AD39|CMU_017970 Tubulin alpha chain, putative n=4 Tax_Id=441375 [Cryptosporidium muris (strain RN66)]	Cellular organisation and transport
CON_P00883	149	39318	8	5	5	3	0.27	sp|CON_P00883|Fructose-bisphosphate aldolase A OS=Oryctolagus cuniculus GN=ALDOA PE=1 SV=2 Tax_Id=9986 [Oryctolagus cuniculus]	Contaminant
CON_P02769	144	69248	15	7	12	7	0.38	sp|CON_P02769|Serum albumin OS=Bos taurus GN=ALB PE=1 SV=4 Tax_Id=9913 [Bos taurus]	Host protein
CON_P10096	140	35845	17	6	12	6	0.7	sp|CON_P10096|Glyceraldehyde-3-phosphate dehydrogenase OS=Bos taurus GN=GAPDH PE=1 SV=4 Tax_Id=9913 [Bos taurus]	Host protein
CON_Q9BGM5	125	49282	24	10	4	2	0.21	sp|CON_Q9BGM5|Keratin, type I cytoskeletal 25 OS=Ovis aries GN=KRT25 PE=2 SV=1 Tax_Id=9940 [Ovis aries]	Contaminant
W7X9E6	111	72892	10	7	1	1	0.04	tr|W7X9E6|TTHERM_000147680 Transmembrane protein, putative n=2 Tax_Id=312017 [Tetrahymena thermophila (strain SB210)]	Uncharacterised protein
Q9BIG6	105	42261	10	2	9	1	0.08	tr|Q9BIG6|Actin I Tax_Id=134027 [Diophrys sp. PPR2000]	Cellular organisation and transport
Q4UIR4	99	14869	7	2	5	2	0.51	tr|Q4UIR4|TA16165 Ubiquitin/60S ribosomal fusion protein, putative n=4 Tax_Id=5874 [Theileria annulata]	Translation
B6AGP7	92	45728	3	2	3	2	0.15	tr|B6AGP7|CMU_035600 Eukaryotic translation initiation factor 4A, putative n=4 Tax_Id=441375 [Cryptosporidium muris (strain RN66)]	Translation
I7IFR1	90	47109	6	2	6	2	0.14	tr|I7IFR1|BBM_I02710 Chromosome I, complete genome n=3 Tax_Id=1133968 [Babesia microti strain RI]	Uncharacterised protein
J4D5A4	92	38396	4	2	4	2	0.18	tr|J4D5A4|TOT_010001237 Glycerol-3-phosphate dehydrogenase [NAD(+)] n=4 Tax_Id=869250 [Theileria orientalis strain Shintoku]	Metabolism
U6L574	84	9155	3	1	2	1	0.38	tr|U6L574|ETH_00009240 Uncharacterized protein n=3 Tax_Id=5802 [Eimeria tenella]	Uncharacterised protein
A0CUL7	83	97630	1	1	1	1	0.03	tr|A0CUL7|GSPATT00010684001 Chromosome undetermined scaffold_28, whole genome shotgun sequence n=3 Tax_Id=5888 [Paramecium tetraurelia]	Uncharacterised protein
L0B0U1	82	15898	3	2	3	2	0.47	tr|L0B0U1|BEWA_005410 40S ribosomal protein S14, putative n=3 Tax_Id=1537102 [Babesia equi strain WA]	Translation
U6H3Y5	81	425207	3	2	2	1	0.01	tr|U6H3Y5|EPH_0055910 Hydrocephalus-inducing protein like protein, related n=3 Tax_Id=51316 [Eimeria praecox]	Cellular organisation and transport
A0A086KYB9	81	23110	3	1	2	1	0.14	tr|A0A086KYB9|TGP89_315780 Putative myosin regulatory light chain n=14 Tax_Id=943119 [Toxoplasma gondii p89]	Cellular organisation and transport
L0B0V2	81	24071	1	1	1	1	0.14	tr|L0B0V2|BEWA_008940 40S ribosomal protein S3, putative n=3 Tax_Id=1537102 [Babesia equi strain WA]	Translation
A0A023B1D8	79	50564	5	2	2	1	0.06	tr|A0A023B1D8|GNI_136710 Uncharacterized protein n=3 Tax_Id=110365 [Gregarina niphandrodes]	Uncharacterised protein
Q4N6I8	77	34895	4	1	4	1	0.09	tr|Q4N6I8|TP01_1182 L-lactate dehydrogenase, putative n=4 Tax_Id=5875 [Theileria parva]	Metabolism
J4C4H6	77	36553	5	1	5	1	0.09	tr|J4C4H6|TOT_040000571 Glyceraldehyde-3-phosphate dehydrogenase n=4 Tax_Id=869250 [Theileria orientalis strain Shintoku]	Metabolism
I7MFE7	77	79416	3	1	3	1	0.04	tr|I7MFE7|TTHERM_00590380 Uncharacterized protein n=3 Tax_Id=312017 [Tetrahymena thermophila (strain SB210)]	Uncharacterised protein
A0A078AIN8	76	44168	2	1	2	1	0.07	tr|A0A078AIN8|Contig1212.g1314 Gtp-binding protein n=2 Tax_Id=5949 [Stylonychia lemnae]	Cellular organisation and transport
J9HXP0	75	397652	11	3	4	1	0.01	tr|J9HXP0|OXYTRI_14617 Uncharacterized protein n=2 Tax_Id=94289 [Oxytricha trifallax]	Uncharacterised protein
U6K9C1	75	69503	3	1	3	1	0.05	tr|U6K9C1|EMH_0020880 Uncharacterized protein n=3 Tax_Id=44415 [Eimeria mitis]	Uncharacterised protein
A0A077X8A8	74	191233	4	1	3	1	0.02	tr|A0A077X8A8|PBANKA_031320 Uncharacterized protein n=3 Tax_Id=5823 [Plasmodium berghei (strain Anka)]	Uncharacterised protein
J4DAA3	74	48034	2	1	2	1	0.07	tr|J4DAA3|TOT_040000220 Enolase n=4 Tax_Id=869250 [Theileria orientalis strain Shintoku]	Metabolism
A0A074STB5	74	66471	1	1	1	1	0.05	tr|A0A074STB5|HHA_266760 Isocitrate dehydrogenase n=3 Tax_Id=99158 [Hammondia hammondi]	Metabolism
A0A078AZK3	73	84996	10	1	4	1	0.04	tr|A0A078AZK3|Contig8670.g9252 Ribosome biogenesis atpase rix7 n=2 Tax_Id=5949 [Stylonychia lemnae]	Cellular organisation and transport
J9I8A8	72	46948	2	1	2	1	0.07	tr|J9I8A8|OXYTRI_04420 Isocitrate dehydrogenase [NADP] n=2 Tax_Id=94289 [Oxytricha trifallax]	Metabolism
G0R2K4	72	22820	3	1	3	1	0.15	tr|G0R2K4|IMG5_044750 Ras family protein, putative n=4 Tax_Id=857967 [Ichthyophthirius multifiliis (strain G5)]	Transcription, regulation and signalling
A0A074T5V1	71	105855	2	1	2	1	0.03	tr|A0A074T5V1|HHA_246520 Uncharacterized protein n=3 Tax_Id=99158 [Hammondia hammondi]	Uncharacterised protein
U6KS93	70	15821	1	1	1	1	0.21	tr|U6KS93|ETH_00041740 Uncharacterized protein n=3 Tax_Id=5802 [Eimeria tenella]	Uncharacterised protein
A0A078A1E7	69	116819	4	1	4	1	0.03	tr|A0A078A1E7|Contig5985.g277 Uncharacterized protein n=2 Tax_Id=5949 [Stylonychia lemnae]	Uncharacterised protein
I7LZR4	69	212749	1	1	1	1	0.02	tr|I7LZR4|TTHERM_00649390 Virulent strain associated lipoprotein, putative n=2 Tax_Id=312017 [Tetrahymena thermophila (strain SB210)]	Uncharacterised protein
W7XG07	68	36766	1	1	1	1	0.09	tr|W7XG07|TTHERM_000899499 Transmembrane protein, putative n=2 Tax_Id=312017 [Tetrahymena thermophila (strain SB210)]	Uncharacterised protein
A0A078AMX5	68	41626	9	3	1	1	0.16	tr|A0A078AMX5|Contig7759.g8273 Uncharacterized protein n=2 Tax_Id=5949 [Stylonychia lemnae]	Uncharacterised protein
J9I8L0	67	132073	4	1	3	1	0.02	tr|J9I8L0|OXYTRI_04320 Viral A-type inclusion protein repeat containing protein n=2 Tax_Id=94289 [Oxytricha trifallax]	Cellular organisation and transport
Q4UIF9	67	44989	4	1	4	1	0.07	tr|Q4UIF9|TA06655 Phosphoglycerate kinase n=4 Tax_Id=5874 [Theileria annulata]	Metabolism
V7PB47	67	141396	9	3	3	1	0.02	tr|V7PB47|YYC_05454 Uncharacterized protein n=2 Tax_Id=1323249 [Plasmodium yoelii 17X]	Uncharacterised protein
A0A078AQ70	67	63744	2	1	1	1	0.05	tr|A0A078AQ70|Contig14057.g14988 E3 ubiquitin-protein ligase nrdp1-like n=2 Tax_Id=5949 [Stylonychia lemnae]	Protein processing and turnover
B3L0A5	67	91145	17	3	2	1	0.04	tr|B3L0A5|PKH_031530 Putative uncharacterized protein n=4 Tax_Id=5851 [Plasmodium knowlesi (strain H)]	Uncharacterised protein
A0A074SW69	66	93002	5	1	3	1	0.04	tr|A0A074SW69|HHA_205470 Translation elongation factor 2 family protein, putative n=3 Tax_Id=99158 [Hammondia hammondi]	Translation
A0A078A9T8	66	104827	1	1	1	1	0.03	tr|A0A078A9T8|Contig13120.g13990 Uncharacterized protein n=2 Tax_Id=5949 [Stylonychia lemnae]	Uncharacterised protein
A0A074SW12	66	331136	5	1	4	1	0.01	tr|A0A074SW12|HHA_277550 UvrD/REP helicase domain-containing protein n=3 Tax_Id=99158 [Hammondia hammondi]	DNA replication and repair
U6N059	66	31181	10	2	2	2	0.22	tr|U6N059|ENH_00076650 Uncharacterized protein n=3 Tax_Id=51315 [Eimeria necatrix]	Uncharacterised protein
A0A078A3M7	66	39376	7	3	1	1	0.08	tr|A0A078A3M7|Contig13080.g13947 Nad dependent epimerase dehydratase n=2 Tax_Id=5949 [Stylonychia lemnae]	Metabolism
A0DQ32	65	368717	3	1	3	1	0.01	tr|A0DQ32|GSPATT00002549001 Chromosome undetermined scaffold_6, whole genome shotgun sequence n=3 Tax_Id=5888 [Paramecium tetraurelia]	Uncharacterised protein
L0AUQ5	65	49002	8	1	4	1	0.07	tr|L0AUQ5|BEWA_022000 Tubulin beta chain, putative n=3 Tax_Id=1537102 [Babesia equi strain WA]	Cellular organisation and transport
A0A078AU79	65	103815	3	1	3	1	0.03	tr|A0A078AU79|Contig2965.g3172 Ankyrin n=2 Tax_Id=5949 [Stylonychia lemnae]	Transcription, regulation and signalling
A0A061DBA3	65	13975	1	1	1	1	0.24	tr|A0A061DBA3|BBBOND_0201820 60S ribosomal L22e protein, putative n=2 Tax_Id=5866 [Babesia bigemina]	Translation
U6MYP2	64	98719	1	1	1	1	0.03	tr|U6MYP2|ENH_00048400 TPR domain-containing protein, putative n=3 Tax_Id=51315 [Eimeria necatrix]	Protein processing and turnover
U6GNZ8	64	52742	2	1	2	1	0.06	tr|U6GNZ8|EAH_00019120 Uncharacterized protein n=3 Tax_Id=5801 [Eimeria acervulina]	Uncharacterised protein
CON_P00921	64	29096	5	1	5	1	0.11	sp|CON_P00921|Carbonic anhydrase 2 OS=Bos taurus GN=CA2 PE=1 SV=3 Tax_Id=9913 [Bos taurus]	Host protein
Q3SD90	64	71863	8	1	8	1	0.05	tr|Q3SD90|Hsp70Pt05 Chromosome undetermined scaffold_84, whole genome shotgun sequence n=3 Tax_Id=5888 [Paramecium tetraurelia]	Uncharacterised protein
J4D5D2	63	17229	1	1	1	1	0.2	tr|J4D5D2|TOT_010000342 Deoxyuridine 5'-triphosphate nucleotidohydrolase n=4 Tax_Id=869250 [Theileria orientalis strain Shintoku]	Metabolism
A0A023BD26	63	78726	2	1	1	1	0.04	tr|A0A023BD26|GNI_007330 Uncharacterized protein n=3 Tax_Id=110365 [Gregarina niphandrodes]	Uncharacterised protein
J4C8J6	63	15218	2	2	2	2	0.49	tr|J4C8J6|TOT_030000164 40S ribosomal protein S17 n=4 Tax_Id=869250 [Theileria orientalis strain Shintoku]	Translation
A0CTN1	63	24474	2	1	2	1	0.14	tr|A0CTN1|GSPATT00010382001 Chromosome undetermined scaffold_27, whole genome shotgun sequence n=3 Tax_Id=5888 [Paramecium tetraurelia]	Uncharacterised protein
I7MGC3	63	131258	2	1	2	1	0.02	tr|I7MGC3|TTHERM_00529740 Ankyrin domain protein n=2 Tax_Id=312017 [Tetrahymena thermophila (strain SB210)]	Transcription, regulation and signalling
J9ILS8	62	316527	8	1	3	1	0.01	tr|J9ILS8|OXYTRI_02573 Uncharacterized protein n=2 Tax_Id=94289 [Oxytricha trifallax]	Uncharacterised protein
W7AJP1	62	126067	5	1	2	1	0.03	tr|W7AJP1|C922_04047 Uncharacterized protein n=3 Tax_Id=1237626 [Plasmodium inui San Antonio 1]	Uncharacterised protein
A0A078A5P9	62	116391	1	1	1	1	0.03	tr|A0A078A5P9|Contig893.g969 Uncharacterized protein n=2 Tax_Id=5949 [Stylonychia lemnae]	Uncharacterised protein
J4C3B5	62	16429	1	1	1	1	0.21	tr|J4C3B5|TOT_020000413 Nucleoside diphosphate kinase n=4 Tax_Id=869250 [Theileria orientalis strain Shintoku]	Transcription, regulation and signalling
J9I2A1	61	100255	8	2	3	1	0.03	tr|J9I2A1|OXYTRI_15529 Kinesin motor domain containing protein n=2 Tax_Id=94289 [Oxytricha trifallax]	Cellular organisation and transport
J9HKZ9	61	225417	4	1	4	1	0.01	tr|J9HKZ9|OXYTRI_14086 WD repeat-containing protein 90 n=2 Tax_Id=94289 [Oxytricha trifallax]	Uncharacterised protein
C5LFW5	61	54252	3	1	2	1	0.06	tr|C5LFW5|Pmar_PMAR021539 EH-domain-containing protein, putative n=3 Tax_Id=423536 [Perkinsus marinus (strain ATCC 50983 / TXsc)]	Cellular organisation and transport
W7APS8	61	108816	3	1	3	1	0.03	tr|W7APS8|YYG_04142 Uncharacterized protein n=2 Tax_Id=138298 [Plasmodium vinckei petteri]	Uncharacterised protein
J9IJC1	60	505793	8	1	4	1	0.01	tr|J9IJC1|OXYTRI_03763 Endoprotease FURIN n=2 Tax_Id=94289 [Oxytricha trifallax]	Cellular organisation and transport
A0A078A7A0	60	690815	4	1	4	1	0.02	tr|A0A078A7A0|Contig16548.g17627 Dynein heavy chain axonemal n=2 Tax_Id=5949 [Stylonychia lemnae]	Cellular organisation and transport
J7MC36	60	26390	2	2	2	2	0.27	tr|J7MC36|TOT_010001227 Peptidyl-prolyl cis-trans isomerase n=4 Tax_Id=869250 [Theileria orientalis strain Shintoku]	Homeostasis
J4DNZ1	60	71307	3	1	1	1	0.05	tr|J4DNZ1|TOT_020000070 Uncharacterized protein n=4 Tax_Id=869250 [Theileria orientalis strain Shintoku]	Uncharacterised protein
XP_001025344.1	60	339556	6	1	3	1	0.01	ref|XP_001025344.1| hypothetical protein TTHERM_00762860 n=2 Tax_Id=5911 [Tetrahymena thermophila]	Uncharacterised protein
J9I8P9	60	153027	2	1	2	1	0.02	tr|J9I8P9|OXYTRI_02017 Tubulintyrosine ligase family putative n=2 Tax_Id=94289 [Oxytricha trifallax]	Protein processing and turnover
J4DPB7	59	467903	5	1	5	1	0.01	tr|J4DPB7|TOT_020000680 Uncharacterized protein n=4 Tax_Id=869250 [Theileria orientalis strain Shintoku]	Uncharacterised protein
J9ITR5	59	90783	4	2	3	1	0.07	tr|J9ITR5|OXYTRI_23770 Uncharacterized protein n=2 Tax_Id=94289 [Oxytricha trifallax]	Uncharacterised protein
A7REH7	59	329156	7	2	4	1	0.01	tr|A7REH7|Normocyte-binding protein 1 n=2 Tax_Id=5857 [Plasmodium fragile]	Host cell attachment and interaction
A0A077ZPT5	59	31538	1	1	1	1	0.1	tr|A0A077ZPT5|Contig17425.g18538 Enoyl-hydratase isomerase family protein n=2 Tax_Id=5949 [Stylonychia lemnae]	Metabolism
W7AD53	59	46930	2	2	1	1	0.07	tr|W7AD53|YYG_03267 Uncharacterized protein n=2 Tax_Id=138298 [Plasmodium vinckei petteri]	Uncharacterised protein
U6KN91	58	130571	8	1	1	1	0.02	tr|U6KN91|ETH_00024950 Uncharacterized protein n=3 Tax_Id=5802 [Eimeria tenella]	Uncharacterised protein
A0BNZ8	58	26389	1	1	1	1	0.13	tr|A0BNZ8|GSPATT00030904001 Chromosome undetermined scaffold_119, whole genome shotgun sequence n=3 Tax_Id=5888 [Paramecium tetraurelia]	Uncharacterised protein
F0V7S6	58	581259	5	1	5	1	0.01	tr|F0V7S6|NCLIV_002550 Putative uncharacterized protein n=4 Tax_Id=572307 [Neospora caninum (strain Liverpool)]	Uncharacterised protein
A0BTB8	57	142746	6	1	5	1	0.02	tr|A0BTB8|GSPATT00032017001 Chromosome undetermined scaffold_127, whole genome shotgun sequence n=3 Tax_Id=5888 [Paramecium tetraurelia]	Uncharacterised protein
A0BBT1	57	85795	1	1	1	1	0.04	tr|A0BBT1|GSPATT00000433001 Chromosome undetermined scaffold_1, whole genome shotgun sequence n=3 Tax_Id=5888 [Paramecium tetraurelia]	Uncharacterised protein
J4D965	57	50767	6	1	4	1	0.06	tr|J4D965|TOT_030000922 DEAD-box family helicase n=4 Tax_Id=869250 [Theileria orientalis strain Shintoku]	Transcription, regulation and signalling
W7A6H5	57	167183	1	1	1	1	0.02	tr|W7A6H5|C922_02813 Uncharacterized protein n=3 Tax_Id=1237626 [Plasmodium inui San Antonio 1]	Uncharacterised protein
J9IZD2	57	29941	3	1	3	1	0.11	tr|J9IZD2|OXYTRI_24668 Ras-related protein RABA2a n=2 Tax_Id=94289 [Oxytricha trifallax]	Cellular organisation and transport
J4CCD7	56	14441	1	1	1	1	0.23	tr|J4CCD7|TOT_010000672 60S ribosomal protein L14 n=4 Tax_Id=869250 [Theileria orientalis strain Shintoku]	Translation
I7LWP9	56	97807	2	1	2	1	0.03	tr|I7LWP9|TTHERM_00578670 Uncharacterized protein n=2 Tax_Id=312017 [Tetrahymena thermophila (strain SB210)]	Uncharacterised protein
U6KQC9	56	46885	2	1	1	1	0.07	tr|U6KQC9|ETH_00007540 Mannitol-1-phosphate dehydrogenase n=3 Tax_Id=5802 [Eimeria tenella]	Metabolism
Q7RN29	55	85275	1	1	1	1	0.04	tr|Q7RN29|PY01996 Uncharacterized protein n=4 Tax_Id=73239 [Plasmodium yoelii yoelii]	Uncharacterised protein
I7J7V6	55	36579	3	1	2	1	0.09	tr|I7J7V6|BBM_I00020 L-lactate dehydrogenase n=3 Tax_Id=1133968 [Babesia microti strain RI]	Metabolism
Q23DQ4	55	131839	1	1	1	1	0.02	tr|Q23DQ4|TTHERM_00046370 Uncharacterized protein n=2 Tax_Id=312017 [Tetrahymena thermophila (strain SB210)]	Uncharacterised protein
A0A074SZF3	55	80442	2	1	2	1	0.04	tr|A0A074SZF3|HHA_202470 rRNA metabolism protein, SBDS family protein n=3 Tax_Id=99158 [Hammondia hammondi]	Transcription, regulation and signalling
Q4N0N8	55	68753	7	1	2	1	0.05	tr|Q4N0N8|TP03_0078 Fumarate hydratase, putative n=4 Tax_Id=5875 [Theileria parva]	Metabolism
L1LCL0	55	71645	5	1	1	1	0.05	tr|L1LCL0|BEWA_015460 DEAD box ATP-dependent RNA helicase family member protein n=3 Tax_Id=1537102 [Babesia equi strain WA]	Transcription, regulation and signalling
J4C7X3	54	16523	1	1	1	1	0.2	tr|J4C7X3|TOT_020000059 60S ribosomal protein L27 n=4 Tax_Id=869250 [Theileria orientalis strain Shintoku]	Translation
A0A078AA52	54	222890	3	1	3	1	0.01	tr|A0A078AA52|Contig911.g1004 Wd-40 repeat protein n=2 Tax_Id=5949 [Stylonychia lemnae]	Uncharacterised protein
Q4N2X4	54	108631	2	1	1	1	0.03	tr|Q4N2X4|TP04_0218 Transportin, putative n=4 Tax_Id=5875 [Theileria parva]	Cellular organisation and transport
702072933	53	37743	1	1	1	1	0.09	gi|702072933|emb|CEA09928.1| cell division cycle protein 48 homologue, partial n=1 Tax_Id=1539141 [Leucocytozoon sp. CP-2014]	Cell division
S8EVF1	53	173510	5	2	3	1	0.02	tr|S8EVF1|TGME49_309110 tRNA methyl transferase n=4 Tax_Id=508771 [Toxoplasma gondii ME49]	Translation
XP_001018150.1	53	56866	3	1	3	1	0.06	ref|XP_001018150.1| conserved hypothetical protein n=2 Tax_Id=5911 [Tetrahymena thermophila]	Uncharacterised protein
J7MC85	53	32721	2	1	1	1	0.1	tr|J7MC85|TOT_040000719 Ran binding protein 1 n=4 Tax_Id=869250 [Theileria orientalis strain Shintoku]	Cellular organisation and transport
A0A086PIA7	52	282048	4	1	3	1	0.01	tr|A0A086PIA7|TGVAND_220208 Uncharacterized protein n=2 Tax_Id=933077 [Toxoplasma gondii VAND]	Uncharacterised protein
C5L8H9	52	18856	3	1	1	1	0.18	tr|C5L8H9|Pmar_PMAR016383 Putative uncharacterized protein n=3 Tax_Id=423536 [Perkinsus marinus (strain ATCC 50983 / TXsc)]	Uncharacterised protein
U6GGN6	52	247360	5	1	4	1	0.01	tr|U6GGN6|EAH_00026870 Uncharacterized protein n=3 Tax_Id=5801 [Eimeria acervulina]	Uncharacterised protein
J4D5C2	52	20489	1	1	1	1	0.16	tr|J4D5C2|TOT_010000322 Ribosomal protein S18 n=4 Tax_Id=869250 [Theileria orientalis strain Shintoku]	Translation
Q4UI52	52	58880	4	1	4	1	0.06	tr|Q4UI52|TA06065 GMP synthase, putative n=4 Tax_Id=5874 [Theileria annulata]	Metabolism
XP_001030484.1	52	284555	1	1	1	1	0.01	ref|XP_001030484.1| hypothetical protein TTHERM_01081810 n=2 Tax_Id=5911 [Tetrahymena thermophila]	Uncharacterised protein
J4C3N1	52	171524	2	1	2	1	0.02	tr|J4C3N1|TOT_020000986 Uncharacterized protein n=4 Tax_Id=869250 [Theileria orientalis strain Shintoku]	Uncharacterised protein
U6LCT0	51	65247	1	1	1	1	0.05	tr|U6LCT0|EBH_0014330 Uncharacterized protein n=3 Tax_Id=51314 [Eimeria brunetti]	Uncharacterised protein
56517635	51	2973	1	1	1	1	1.26	gi|56517635|emb|CAH76141.1| hypothetical protein PC102152.00.0 n=1 Tax_Id=31271 [Plasmodium chabaudi chabaudi]	Uncharacterised protein
A0A086QM32	51	176790	7	1	3	1	0.02	tr|A0A086QM32|TGMAS_267750 Uncharacterized protein n=2 Tax_Id=943118 [Toxoplasma gondii MAS]	Uncharacterised protein
J9I1E8	51	104633	3	1	2	1	0.03	tr|J9I1E8|OXYTRI_07768 ATPases of the AAA+ class n=2 Tax_Id=94289 [Oxytricha trifallax]	Protein processing and turnover
A0A060RZA1	50	362221	5	1	5	1	0.01	tr|A0A060RZA1|PRCDC_1411700 Uncharacterized protein n=2 Tax_Id=5854 [Plasmodium reichenowi]	Uncharacterised protein
J9EU22	50	119674	2	1	2	1	0.03	tr|J9EU22|OXYTRI_09671 Uncharacterized protein n=2 Tax_Id=94289 [Oxytricha trifallax]	Uncharacterised protein
XP_008624513.1	50	124210	2	1	2	1	0.03	ref|XP_008624513.1| hypothetical protein YYE_02637 n=2 Tax_Id=54757 [Plasmodium vinckei vinckei]	Uncharacterised protein
P24118	50	52542	2	1	2	1	0.06	sp|P24118|Citrate synthase, mitochondrial n=3 Tax_Id=5911 [Tetrahymena thermophila]	Metabolism
Q22D35	50	199733	1	1	1	1	0.02	tr|Q22D35|TTHERM_01002830 ATPase, histidine kinase-, DNA gyrase B n=2 Tax_Id=312017 [Tetrahymena thermophila (strain SB210)]	Transcription, regulation and signalling
J4DA68	49	31345	2	1	2	1	0.11	tr|J4DA68|TOT_040000181 40S ribosomal protein SA n=4 Tax_Id=869250 [Theileria orientalis strain Shintoku]	Translation
J9IX97	49	66299	1	1	1	1	0.05	tr|J9IX97|OXYTRI_01089 Glycosyl transferase, family 2 n=2 Tax_Id=94289 [Oxytricha trifallax]	Protein processing and turnover
A5K322	48	61932	1	1	1	1	0.05	tr|A5K322|PVX_116795 Uncharacterized protein n=4 Tax_Id=126793 [Plasmodium vivax (strain Salvador I)]	Uncharacterised protein
XP_002368490.1	48	109645	1	1	1	1	0.03	ref|XP_002368490.1| hypothetical protein TGME49_091060 n=2 Tax_Id=508771 [Toxoplasma gondii ME49]	Uncharacterised protein
G0R318	48	59244	3	1	2	1	0.06	tr|G0R318|IMG5_182340 T-complex protein 1 subunit alpha n=3 Tax_Id=857967 [Ichthyophthirius multifiliis (strain G5)]	Protein processing and turnover
A0A024VWP9	47	36737	7	1	1	1	0.09	tr|A0A024VWP9|PFTANZ_06419 Uncharacterized protein n=2 Tax_Id=1036725 [Plasmodium falciparum Tanzania (2000708)]	Uncharacterised protein
U6KVG5	47	613138	4	1	4	1	0.01	tr|U6KVG5|ETH_00016900 UBA/TS-N domain-containing protein, putative n=3 Tax_Id=5802 [Eimeria tenella]	Protein processing and turnover
XP_001018739.1	46	548779	5	1	5	1	0.01	ref|XP_001018739.1| hypothetical protein TTHERM_00292250 n=2 Tax_Id=5911 [Tetrahymena thermophila]	Uncharacterised protein
J9HZZ6	46	76242	1	1	1	1	0.04	tr|J9HZZ6|OXYTRI_13418 AMP-binding enzyme family protein n=2 Tax_Id=94289 [Oxytricha trifallax]	Metabolism
CON_P00760	46	25769	3	1	1	1	0.13	sp|CON_P00760|Cationic trypsin OS=Bos taurus PE=1 SV=3 Tax_Id=9913 [Bos taurus]	Host protein
A0CV32	45	188546	4	1	1	1	0.02	tr|A0CV32|GSPATT00010817001 Chromosome undetermined scaffold_29, whole genome shotgun sequence n=3 Tax_Id=5888 [Paramecium tetraurelia]	Uncharacterised protein
U6LDY6	45	200382	2	1	1	1	0.02	tr|U6LDY6|EBH_0063170 Uncharacterized protein n=3 Tax_Id=51314 [Eimeria brunetti]	Uncharacterised protein
A0A024V5V6	45	59991	3	1	1	1	0.05	tr|A0A024V5V6|PFFVO_03473 Uncharacterized protein n=3 Tax_Id=1036723 [Plasmodium falciparum Vietnam Oak-Knoll (FVO)]	Uncharacterised protein
W7XKV5	45	15069	1	1	1	1	0.22	tr|W7XKV5|TTHERM_002653495 Transmembrane protein, putative n=2 Tax_Id=312017 [Tetrahymena thermophila (strain SB210)]	Uncharacterised protein
557152311	45	72985	2	1	1	1	0.04	gi|557152311|emb|CDJ44659.1| hypothetical protein, conserved, partial n=2 Tax_Id=5802 [Eimeria tenella]	Uncharacterised protein
I7M4F0	45	52037	2	1	2	1	0.06	tr|I7M4F0|TTHERM_00688370 Uncharacterized protein n=3 Tax_Id=312017 [Tetrahymena thermophila (strain SB210)]	Uncharacterised protein
J9I4C4	44	90054	2	1	2	1	0.04	tr|J9I4C4|OXYTRI_11217 Uncharacterized protein n=2 Tax_Id=94289 [Oxytricha trifallax]	Uncharacterised protein
I7M3Y9	44	152981	3	1	1	1	0.02	tr|I7M3Y9|TTHERM_00238890 Uncharacterized protein n=2 Tax_Id=312017 [Tetrahymena thermophila (strain SB210)]	Uncharacterised protein
A0A077XIE5	44	138936	4	1	4	1	0.02	tr|A0A077XIE5|PBANKA_144210 Uncharacterized protein n=3 Tax_Id=5823 [Plasmodium berghei (strain Anka)]	Uncharacterised protein
W4J8G5	43	362806	4	1	4	1	0.01	tr|W4J8G5|PFUGPA_00027 Uncharacterized protein n=2 Tax_Id=57270 [Plasmodium falciparum (isolate Palo Alto / Uganda)]	Uncharacterised protein
A0EFY5	43	64624	1	1	1	1	0.05	tr|A0EFY5|GSPATT00026549001 Chromosome undetermined scaffold_94, whole genome shotgun sequence n=3 Tax_Id=5888 [Paramecium tetraurelia]	Uncharacterised protein
A0A086QIE1	43	287114	5	1	3	1	0.01	tr|A0A086QIE1|TGVAND_247050 Uncharacterized protein n=2 Tax_Id=933077 [Toxoplasma gondii VAND]	Uncharacterised protein
A0A086PKW3	43	97530	1	1	1	1	0.03	tr|A0A086PKW3|TGVAND_297720A Trehalose-phosphatase n=2 Tax_Id=933077 [Toxoplasma gondii VAND]	Homeostasis
A0EEW0	42	92402	13	1	2	1	0.04	tr|A0EEW0|GSPATT00026174001 Chromosome undetermined scaffold_92, whole genome shotgun sequence n=3 Tax_Id=5888 [Paramecium tetraurelia]	Uncharacterised protein
A0A074TAN6	42	78295	2	1	2	1	0.04	tr|A0A074TAN6|HHA_234610 WD-40 repeat protein n=3 Tax_Id=99158 [Hammondia hammondi]	Uncharacterised protein
A0EDC6	41	30220	1	1	1	1	0.11	tr|A0EDC6|GSPATT00004162001 Chromosome undetermined scaffold_9, whole genome shotgun sequence n=3 Tax_Id=5888 [Paramecium tetraurelia]	Uncharacterised protein
Q5CKA3	41	89746	5	1	4	1	0.04	tr|Q5CKA3|Chro.10043 Cell division cycle protein 48 n=4 Tax_Id=237895 [Cryptosporidium hominis]	Cell division
J9I4Y5	41	115049	5	1	4	1	0.03	tr|J9I4Y5|OXYTRI_03829 Uncharacterized protein n=2 Tax_Id=94289 [Oxytricha trifallax]	Uncharacterised protein
A0A074SM58	40	28781	2	1	1	1	0.12	tr|A0A074SM58|HHA_455790 Uncharacterized protein n=3 Tax_Id=99158 [Hammondia hammondi]	Uncharacterised protein
Q231B7	40	94468	2	1	2	1	0.03	tr|Q231B7|TTHERM_00433400 Tetratricopeptide repeat protein n=2 Tax_Id=312017 [Tetrahymena thermophila (strain SB210)]	Uncharacterised protein
U6LM14	40	99910	1	1	1	1	0.03	tr|U6LM14|EBH_0066120 Uncharacterized protein n=3 Tax_Id=51314 [Eimeria brunetti]	Uncharacterised protein
J9I8U3	40	110950	1	1	1	1	0.03	tr|J9I8U3|OXYTRI_04207 Protein kinase domain containing protein n=2 Tax_Id=94289 [Oxytricha trifallax]	Protein processing and turnover
Q247R4	39	111308	4	1	3	1	0.03	tr|Q247R4|TTHERM_00994330 Transmembrane protein, putative n=3 Tax_Id=312017 [Tetrahymena thermophila (strain SB210)]	Uncharacterised protein
G9FM19	39	39737	2	1	1	1	0.08	tr|G9FM19|Fructose-bisphosphate aldolase n=2 Tax_Id=5855 [Plasmodium vivax]	Metabolism
W7FJS9	38	695853	9	1	8	1	0.03	tr|W7FJS9|PFAG_01983 Uncharacterized protein n=2 Tax_Id=478859 [Plasmodium falciparum Santa Lucia]	Uncharacterised protein
U6M915	38	178151	5	1	5	1	0.02	tr|U6M915|EMWEY_00014200 Uncharacterized protein n=3 Tax_Id=5804 [Eimeria maxima]	Uncharacterised protein
J4C344	38	30451	1	1	1	1	0.11	tr|J4C344|TOT_020000067 60S ribosomal protein L7a n=4 Tax_Id=869250 [Theileria orientalis strain Shintoku]	Translation
A0DXR2	37	99770	3	1	3	1	0.03	tr|A0DXR2|GSPATT00021453001 Chromosome undetermined scaffold_69, whole genome shotgun sequence n=3 Tax_Id=5888 [Paramecium tetraurelia]	Uncharacterised protein
J4C379	36	137725	5	1	5	1	0.02	tr|J4C379|TOT_020000238 Uncharacterized protein n=4 Tax_Id=869250 [Theileria orientalis strain Shintoku]	Uncharacterised protein
A0A061CZG9	36	35723	1	1	1	1	0.09	tr|A0A061CZG9|BBBOND_0101170 Inorganic pyrophosphatase family protein, putative n=2 Tax_Id=5866 [Babesia bigemina]	Metabolism
C5KBZ8	36	20563	3	1	3	1	0.16	tr|C5KBZ8|Pmar_PMAR019912 ADP ribosylation factor 1, putative n=3 Tax_Id=423536 [Perkinsus marinus (strain ATCC 50983 / TXsc)]	Transcription, regulation and signalling
Q7PDM7	36	84937	2	1	2	1	0.04	tr|Q7PDM7|PY05180 MAC/Perforin domain, putative n=4 Tax_Id=73239 [Plasmodium yoelii yoelii]	Host cell attachment and interaction
XP_001009122.1	36	105446	1	1	1	1	0.03	ref|XP_001009122.1| hypothetical protein TTHERM_00264720 n=2 Tax_Id=5911 [Tetrahymena thermophila]	Uncharacterised protein
A0A074TAX0	34	76920	3	1	3	1	0.04	tr|A0A074TAX0|HHA_262935 Uncharacterized protein n=3 Tax_Id=99158 [Hammondia hammondi]	Uncharacterised protein
Q23KB2	34	59917	1	1	1	1	0.05	tr|Q23KB2|TTHERM_00194230 Uncharacterized protein n=2 Tax_Id=312017 [Tetrahymena thermophila (strain SB210)]	Uncharacterised protein
Q7R726	33	26853	2	1	1	1	0.12	tr|Q7R726|PY07763 Uncharacterized protein n=3 Tax_Id=73239 [Plasmodium yoelii yoelii]	Uncharacterised protein
A5K0E2	33	95271	1	1	1	1	0.03	tr|A5K0E2|PVX_084245 Uncharacterized protein n=4 Tax_Id=126793 [Plasmodium vivax (strain Salvador I)]	Uncharacterised protein
J4DPA6	31	41310	1	1	1	1	0.08	tr|J4DPA6|TOT_020001075 Uncharacterized protein n=4 Tax_Id=869250 [Theileria orientalis strain Shintoku]	Uncharacterised protein
A0A074SXJ1	31	120882	1	1	1	1	0.03	tr|A0A074SXJ1|HHA_283760 Uncharacterized protein n=3 Tax_Id=99158 [Hammondia hammondi]	Uncharacterised protein
A0DND2	31	29356	1	1	1	1	0.11	tr|A0DND2|GSPATT00018744001 Chromosome undetermined scaffold_58, whole genome shotgun sequence n=3 Tax_Id=5888 [Paramecium tetraurelia]	Uncharacterised protein
EfaB_PLUS_40637.g2579	14	30687	3	1	2	1	0.11	eupathdb|EfaB_PLUS_40637.g2579|unspecified product n=1 Tax_Id=84963 [Eimeria falciformis Bayer Haberkorn 1970]	Uncharacterised protein
Buffeli Detergent
Accession	Score	Mass	Num. of matches	No of signif matches	No of seqs	No of signif seqs	emPAI	Description	Comments
CON_P02070	208	15944	18	11	7	5	2.16	sp|CON_P02070|Hemoglobin subunit beta OS=Bos taurus GN=HBB PE=1 SV=1 Tax_Id=9913 [Bos taurus]	Host protein
CON_P00761	106	24394	25	4	4	1	0.29	sp|CON_P00761|Trypsin OS=Sus scrofa PE=1 SV=1 Tax_Id=9823 [Sus scrofa]	Contaminant
J4C3M5	93	45773	7	1	4	1	0.07	tr|J4C3M5|TOT_020000955 J4C3M5_THEOR Uncharacterized protein n=4 Tax_Id=869250 [Theileria orientalis strain Shintoku]	Protein processing and turnover
CON_P01966	91	15175	2	1	2	1	0.22	sp|CON_P01966|Hemoglobin subunit alpha OS=Bos taurus GN=HBA PE=1 SV=2 Tax_Id=9913 [Bos taurus]	Host protein
CON_Q6R650	86	49392	1	1	1	1	0.07	sp|CON_Q6R650|Keratin, type I cytoskeletal 25 OS=Capra hircus GN=KRT25 PE=2 SV=1 Tax_Id=9925 [Capra hircus]	Contaminant
Cvel_27071	67	182605	4	1	3	1	0.02	eupathdb|Cvel_27071|Multidrug resistance-associated protein 4, putative n=1 Tax_Id=1169474 [Chromera velia CCMP2878]	Uncharacterised protein
J4C7G7	56	28403	2	1	1	1	0.12	tr|J4C7G7|TOT_010000473 J4C7G7_THEOR Conserved transmembrane protein n=4 Tax_Id=869250 [Theileria orientalis strain Shintoku]	Uncharacterised protein
U6KN91	55	130571	1	1	1	1	0.02	tr|U6KN91|ETH_00024950 U6KN91_EIMTE Uncharacterized protein n=3 Tax_Id=5802 [Eimeria tenella]	Uncharacterised protein
A0A077ZT80	55	131968	6	1	2	1	0.02	tr|A0A077ZT80|Contig57.g67 A0A077ZT80_STYLE Uncharacterized protein n=2 Tax_Id=5949 [Stylonychia lemnae]	Uncharacterised protein
J4C8Q9	55	9343	2	2	1	1	0.37	tr|J4C8Q9|TOT_030000481 J4C8Q9_THEOR Protein translocation complex subunit gamma chain n=4 Tax_Id=869250 [Theileria orientalis strain Shintoku]	Cellular organisation and transport
A0A078A5N9	52	160691	1	1	1	1	0.02	tr|A0A078A5N9|Contig5220.g5605 A0A078A5N9_STYLE Uncharacterized protein n=2 Tax_Id=5949 [Stylonychia lemnae]	Uncharacterised protein
C5KMV6	42	113413	1	1	1	1	0.03	tr|C5KMV6|Pmar_PMAR029336 C5KMV6_PERM5 Beta-tubulin cofactor d, putative n=3 Tax_Id=423536 [Perkinsus marinus (strain ATCC 50983 / TXsc)]	Cellular organisation and transport
A5K9M5	41	247360	2	1	1	1	0.01	tr|A5K9M5|PVX_080580 A5K9M5_PLAVS Uncharacterized protein n=3 Tax_Id=126793 [Plasmodium vivax (strain Salvador I)]	Uncharacterised protein
Cvel_4364	41	99256	5	1	1	1	0.03	eupathdb|Cvel_4364|MORC family CW-type zinc finger protein 3, putative n=1 Tax_Id=1169474 [Chromera velia CCMP2878]	Uncharacterised protein
Vbra_21020	34	91223	1	1	1	1	0.04	eupathdb|Vbra_21020|Peptidyl-prolyl cis-trans isomerase D, putative n=1 Tax_Id=1169540 [Vitrella brassicaformis CCMP3155]	Protein processing and turnover
CON_P02070	179	15944	5	3	3	2	0.47	sp|CON_P02070|Hemoglobin subunit beta OS=Bos taurus GN=HBB PE=1 SV=1 Tax_Id=9913 [Bos taurus]	Host protein
CON_P00761	100	24394	9	4	2	2	0.29	sp|CON_P00761|Trypsin OS=Sus scrofa PE=1 SV=1 Tax_Id=9823 [Sus scrofa]	Contaminant
Q23K01	55	74658	3	1	2	1	0.04	tr|Q23K01|TTHERM_00196330 Q23K01_TETTS Myb-like DNA-binding domain protein n=2 Tax_Id=312017 [Tetrahymena thermophila (strain SB210)]	DNA replication and repair
J4C7G7	48	28403	1	1	1	1	0.12	tr|J4C7G7|TOT_010000473 J4C7G7_THEOR Conserved transmembrane protein n=4 Tax_Id=869250 [Theileria orientalis strain Shintoku]	Uncharacterised protein
XP_676128.1	32	50926	1	1	1	1	0.06	ref|XP_676128.1| glycine--tRNA ligase, partial n=2 Tax_Id=5823 [Plasmodium berghei ANKA]	Translation
672558565	68	83142	5	3	1	1	0.04	gi|672558565|gb|KFH00302.1| CorA family Mg2+ transporter protein, partial n=1 Tax_Id=933077 [Toxoplasma gondii VAND]	Cellular organisation and transport
225320237	393	23205	21	20	9	9	3.38	gi|225320237|dbj|BAH29775.1| 23 kDa piroplasm membrane protein n=1 Tax_Id=68886 [Theileria orientalis]	Host cell attachment and interaction
CON_P00761	216	24394	33	9	5	3	0.67	sp|CON_P00761|Trypsin OS=Sus scrofa PE=1 SV=1 Tax_Id=9823 [Sus scrofa]	Contaminant
CON_P02666	105	25091	2	2	1	1	0.28	sp|CON_P02666|Beta-casein OS=Bos taurus GN=CSN2 PE=1 SV=2 Tax_Id=9913 [Bos taurus]	Host protein
XP_004034694.1	69	78291	2	1	1	1	0.04	ref|XP_004034694.1| hypothetical protein IMG5_115940, partial n=2 Tax_Id=5932 [Ichthyophthirius multifiliis]	Uncharacterised protein
J4C8Y8	67	104039	6	3	4	2	0.06	tr|J4C8Y8|TOT_030000877 J4C8Y8_THEOR Uncharacterized protein n=4 Tax_Id=869250 [Theileria orientalis strain Shintoku]	Uncharacterised protein
CON_P02070	66	15944	6	3	4	3	0.78	sp|CON_P02070|Hemoglobin subunit beta OS=Bos taurus GN=HBB PE=1 SV=1 Tax_Id=9913 [Bos taurus]	Host protein
A0A081IBR8	64	19466	3	1	1	1	0.17	tr|A0A081IBR8|YYE_04161 A0A081IBR8_PLAVN Monothiol glutaredoxin n=3 Tax_Id=54757 [Plasmodium vinckei vinckei]	Homeostasis
J9I4N4	60	66161	3	1	1	1	0.05	tr|J9I4N4|OXYTRI_06120 J9I4N4_9SPIT Uncharacterized protein n=2 Tax_Id=1172189 [Oxytricha trifallax]	Uncharacterised protein
Cvel_3834	57	220789	1	1	1	1	0.01	eupathdb|Cvel_3834|Myotubularin-related protein 13, putative n=1 Tax_Id=1169474 [Chromera velia CCMP2878]	Transcription, regulation and signalling
A0A060S240	56	143729	1	1	1	1	0.02	tr|A0A060S240|PRCDC_1313000 A0A060S240_PLARE Uncharacterized protein n=3 Tax_Id=5854 [Plasmodium reichenowi]	Uncharacterised protein
A0A060RTC6	53	145122	3	1	1	1	0.02	tr|A0A060RTC6|PRCDC_0415600 A0A060RTC6_PLARE Uncharacterized protein n=3 Tax_Id=5854 [Plasmodium reichenowi]	Uncharacterised protein
A0A078B8Y2	48	22887	1	1	1	1	0.15	tr|A0A078B8Y2|Contig8073.g8611 A0A078B8Y2_STYLE Uncharacterized protein n=2 Tax_Id=5949 [Stylonychia lemnae]	Uncharacterised protein
U6GDI6	45	83018	1	1	1	1	0.04	tr|U6GDI6|EAH_00031560 U6GDI6_EIMAC Uncharacterized protein n=3 Tax_Id=5801 [Eimeria acervulina]	Uncharacterised protein
A0CEQ5	43	64281	1	1	1	1	0.05	tr|A0CEQ5|GSPATT00037711001 A0CEQ5_PARTE Chromosome undetermined scaffold_172, whole genome shotgun sequence n=3 Tax_Id=5888 [Paramecium tetraurelia]	Uncharacterised protein
CON_P02662	43	24513	1	1	1	1	0.14	sp|CON_P02662|Alpha-S1-casein OS=Bos taurus GN=CSN1S1 PE=1 SV=2 Tax_Id=9913 [Bos taurus]	Host protein
U6KPG4	41	50883	2	1	1	1	0.06	tr|U6KPG4|ETH_00009690 U6KPG4_EIMTE Saccharopine dehydrogenase, putative n=3 Tax_Id=5802 [Eimeria tenella]	Metabolism
J4C7G7	34	28403	1	1	1	1	0.12	tr|J4C7G7|TOT_010000473 J4C7G7_THEOR Conserved transmembrane protein n=4 Tax_Id=869250 [Theileria orientalis strain Shintoku]	Uncharacterised protein
CON_P02070	217	15944	8	6	5	4	1.61	sp|CON_P02070|Hemoglobin subunit beta OS=Bos taurus GN=HBB PE=1 SV=1 Tax_Id=9913 [Bos taurus]	Host protein
CON_P00761	110	24394	21	6	4	2	0.47	sp|CON_P00761|Trypsin OS=Sus scrofa PE=1 SV=1 Tax_Id=9823 [Sus scrofa]	Contaminant
J4DPB7	97	467903	9	3	5	3	0.02	tr|J4DPB7|TOT_020000680 J4DPB7_THEOR Uncharacterized protein n=4 Tax_Id=869250 [Theileria orientalis strain Shintoku]	Uncharacterised protein
Vbra_12830	66	49525	2	1	1	1	0.07	eupathdb|Vbra_12830|Hypothetical protein n=1 Tax_Id=1169540 [Vitrella brassicaformis CCMP3155]	Uncharacterised protein
Q4N5D3	59	23479	2	1	1	1	0.14	tr|Q4N5D3|TP02_0357 Q4N5D3_THEPA Uncharacterized protein n=4 Tax_Id=5875 [Theileria parva]	Uncharacterised protein
B2LUG0	49	32174	2	1	1	1	0.1	tr|B2LUG0|p33 B2LUG0_9APIC 33 kDa piroplasm surface protein Tax_Id=359401 [Theileria sp. ex Hongan buffalo]	Host cell attachment and interaction
J4C8Q9	48	9343	1	1	1	1	0.37	tr|J4C8Q9|TOT_030000481 J4C8Q9_THEOR Protein translocation complex subunit gamma chain n=4 Tax_Id=869250 [Theileria orientalis strain Shintoku]	Cellular organisation and transport
A0A061D4R8	45	56087	2	2	1	1	0.06	tr|A0A061D4R8|BBBOND_0201990 A0A061D4R8_BABBI Phospholipase D active site motif family protein, putative n=2 Tax_Id=5866 [Babesia bigemina]	Metabolism
CON_P17690	44	38227	1	1	1	1	0.09	sp|CON_P17690|Beta-2-glycoprotein 1 OS=Bos taurus GN=APOH PE=1 SV=4 Tax_Id=9913 [Bos taurus]	Host protein
672558565	69	83142	4	2	1	1		gi|672558565|gb|KFH00302.1| CorA family Mg2+ transporter protein, partial n=1 Tax_Id=933077 [Toxoplasma gondii VAND]	Cellular organisation and transport
CON_P02070	160	15944	9	7	6	4	1.15	sp|CON_P02070|Hemoglobin subunit beta OS=Bos taurus GN=HBB PE=1 SV=1 Tax_Id=9913 [Bos taurus]	Host protein
J4CDD8	152	33589	9	6	5	4	0.45	tr|J4CDD8|TOT_030000228 J4CDD8_THEOR Uncharacterized protein n=4 Tax_Id=869250 [Theileria orientalis strain Shintoku]	Uncharacterised protein
CON_P00761	101	24394	12	5	4	4	0.67	sp|CON_P00761|Trypsin OS=Sus scrofa PE=1 SV=1 Tax_Id=9823 [Sus scrofa]	Contaminant
CON_P68082	70	17072	1	1	1	1	0.2	sp|CON_P68082|Myoglobin OS=Equus caballus GN=MB PE=1 SV=2 Tax_Id=9796 [Equus caballus]	Contaminant
A0DQU6	51	39921	3	1	1	1	0.08	tr|A0DQU6|GSPATT00002813001 A0DQU6_PARTE Chromosome undetermined scaffold_6, whole genome shotgun sequence n=3 Tax_Id=5888 [Paramecium tetraurelia]	Uncharacterised protein
J4DNT8	44	45161	2	1	2	1	0.07	tr|J4DNT8|TOT_010000989 J4DNT8_THEOR Porin n=4 Tax_Id=869250 [Theileria orientalis strain Shintoku]	Cellular organisation and transport
747156609	1777	30179	272	107	46	20	8.86	gi|747156609|gb|AJE24551.1| major piroplasm surface protein, partial n=1 Tax_Id=68886 [Theileria orientalis]	Host cell attachment and interaction
J4CDD8	747	33589	64	40	18	14	4.93	tr|J4CDD8|TOT_030000228 J4CDD8_THEOR Uncharacterized protein n=4 Tax_Id=869250 [Theileria orientalis strain Shintoku]	Cellular organisation and transport
Q4UBJ9	414	33847	21	14	4	3	0.59	tr|Q4UBJ9|TA18055 Q4UBJ9_THEAN Genomic DNA chromosome 3 n=4 Tax_Id=5874 [Theileria annulata]	Uncharacterised protein
CON_P00761	116	24394	7	6	3	3	0.47	sp|CON_P00761|Trypsin OS=Sus scrofa PE=1 SV=1 Tax_Id=9823 [Sus scrofa]	Contaminant
CON_P02070	61	15944	5	1	4	1	0.21	sp|CON_P02070|Hemoglobin subunit beta OS=Bos taurus GN=HBB PE=1 SV=1 Tax_Id=9913 [Bos taurus]	Host protein
A0A023B4Z5	59	76664	1	1	1	1	0.04	tr|A0A023B4Z5|GNI_096650 A0A023B4Z5_GRENI Uncharacterized protein n=4 Tax_Id=110365 [Gregarina niphandrodes]	Uncharacterised protein
Vbra_4944	48	266696	28	1	1	1	0.01	eupathdb|Vbra_4944|Hypothetical protein n=1 Tax_Id=1169540 [Vitrella brassicaformis CCMP3155]	Uncharacterised protein
Cvel_5851	48	44330	4	2	2	1	0.07	eupathdb|Cvel_5851|60S ribosomal protein L3-2, putative n=1 Tax_Id=1169474 [Chromera velia CCMP2878]	Translation
B6AEX9	44	79022	3	1	1	1	0.04	tr|B6AEX9|CMU_014220 B6AEX9_CRYMR Putative uncharacterized protein n=4 Tax_Id=441375 [Cryptosporidium muris (strain RN66)]	Uncharacterised protein
A0A024VDU7	38	121808	1	1	1	1	0.03	tr|A0A024VDU7|PFFVO_00302 A0A024VDU7_PLAFA Uncharacterized protein n=2 Tax_Id=1036723 [Plasmodium falciparum Vietnam Oak-Knoll (FVO)]	Uncharacterised protein
C5LH54	38	66184	3	1	1	1	0.05	tr|C5LH54|Pmar_PMAR017277 C5LH54_PERM5 Putative uncharacterized protein n=3 Tax_Id=423536 [Perkinsus marinus (strain ATCC 50983 / TXsc)]	Uncharacterised protein
A0BDL8	34	241705	1	1	1	1	0.01	tr|A0BDL8|GSPATT00027664001 A0BDL8_PARTE Chromosome undetermined scaffold_100, whole genome shotgun sequence n=3 Tax_Id=5888 [Paramecium tetraurelia]	Uncharacterised protein
A0A078AFN5	29	42001	3	1	1	1	0.08	tr|A0A078AFN5|Contig16150.g17206 A0A078AFN5_STYLE Mitogen-activated protein kinase n=2 Tax_Id=5949 [Stylonychia lemnae]	Transcription, regulation and signalling
Vbra_14552	29	99818	1	1	1	1	0.03	eupathdb|Vbra_14552|Protein transport protein Sec24-like At3g07100, putative n=1 Tax_Id=1169540 [Vitrella brassicaformis CCMP3155]	Protein processing and turnover
Q95WT3	27	58885	1	1	1	1	0.06	tr|Q95WT3|Q95WT3_TETPY CCTepsilon subunit n=2 Tax_Id=5908 [Tetrahymena pyriformis]	Protein processing and turnover
CON_P02070	233	15944	11	9	8	6	2.16	sp|CON_P02070|Hemoglobin subunit beta OS=Bos taurus GN=HBB PE=1 SV=1 Tax_Id=9913 [Bos taurus]	Host protein
J4CDD8	224	33589	21	14	11	7	1.32	tr|J4CDD8|TOT_030000228 J4CDD8_THEOR Uncharacterized protein n=4 Tax_Id=869250 [Theileria orientalis strain Shintoku]	Uncharacterised protein
J4D5C9	123	35563	5	3	3	1	0.19	tr|J4D5C9|TOT_010000337 J4D5C9_THEOR Uncharacterized protein n=4 Tax_Id=869250 [Theileria orientalis strain Shintoku]	Uncharacterised protein
CON_P00761	100	24394	19	4	5	3	0.47	sp|CON_P00761|Trypsin OS=Sus scrofa PE=1 SV=1 Tax_Id=9823 [Sus scrofa]	Contaminant
A0DQU6	72	39921	2	1	1	1	0.08	tr|A0DQU6|GSPATT00002813001 A0DQU6_PARTE Chromosome undetermined scaffold_6, whole genome shotgun sequence n=3 Tax_Id=5888 [Paramecium tetraurelia]	Uncharacterised protein
J4CE35	58	45302	3	2	3	2	0.15	tr|J4CE35|TOT_040000572 J4CE35_THEOR Cytochrome C1 n=4 Tax_Id=869250 [Theileria orientalis strain Shintoku]	Metabolism
Q4UIC5	56	115612	1	1	1	1	0.03	tr|Q4UIC5|TA06470 Q4UIC5_THEAN Genomic DNA chromosome 1 part 1 n=4 Tax_Id=5874 [Theileria annulata]	Uncharacterised protein
F0VI25	48	360939	2	1	1	1	0.01	tr|F0VI25|NCLIV_031730 F0VI25_NEOCL Complete genome, chromosome VIII n=4 Tax_Id=572307 [Neospora caninum (strain Liverpool)]	Translation
Q23UG1	41	76800	6	1	1	1	0.04	tr|Q23UG1|TTHERM_00937710 Q23UG1_TETTS Uncharacterized protein n=2 Tax_Id=312017 [Tetrahymena thermophila (strain SB210)]	Uncharacterised protein
I7LZM1	35	170557	1	1	1	1	0.02	tr|I7LZM1|TTHERM_00715670 I7LZM1_TETTS Cyclic nucleotide-binding domain protein n=2 Tax_Id=312017 [Tetrahymena thermophila (strain SB210)]	Uncharacterised protein
CON_P02070	267	15994	13	11	8	6	2.82	sp|CON_P02070|Hemoglobin subunit beta OS=Bos taurus GN=HBB PE=1 SV=1 Tax_Id=9913 [Bos taurus]	Host protein
CON_P01966	121	15175	5	2	3	1	0.22	sp|CON_P01966|Hemoglobin subunit alpha OS=Bos taurus GN=HBA PE=1 SV=2 Tax_Id=9913 [Bos taurus]	Host protein
J4CDD8	85	33589	4	2	3	2	0.21	tr|J4CDD8|TOT_030000228 J4CDD8_THEOR Uncharacterized protein n=4 Tax_Id=869250 [Theileria orientalis strain Shintoku]	Uncharacterised protein
CON_P00761	65	24394	10	3	3	2	0.29	sp|CON_P00761|Trypsin OS=Sus scrofa PE=1 SV=1 Tax_Id=9823 [Sus scrofa]	Contaminant
J9IWS9	57	160753	2	1	1	1	0.02	tr|J9IWS9|OXYTRI_16665 J9IWS9_9SPIT Putative beta-tubulin polyglutamylase n=2 Tax_Id=1172189 [Oxytricha trifallax]	Cellular organisation and transport
A0DQU6	54	39921	7	1	1	1	0.08	tr|A0DQU6|GSPATT00002813001 A0DQU6_PARTE Chromosome undetermined scaffold_6, whole genome shotgun sequence n=3 Tax_Id=5888 [Paramecium tetraurelia]	Uncharacterised protein
Cvel_15506	38	74175	1	1	1	1	0.04	eupathdb|Cvel_15506|Hypothetical protein n=1 Tax_Id=1169474 [Chromera velia CCMP2878]	Uncharacterised protein
CON_P02070	328	15944	13	11	7	5	2.16	sp|CON_P02070|Hemoglobin subunit beta OS=Bos taurus GN=HBB PE=1 SV=1 Tax_Id=9913 [Bos taurus]	Host protein
CON_P01966	125	15175	5	2	3	1	0.22	sp|CON_P01966|Hemoglobin subunit alpha OS=Bos taurus GN=HBA PE=1 SV=2 Tax_Id=9913 [Bos taurus]	Host protein
CON_P00761	107	24394	12	7	4	4	0.67	sp|CON_P00761|Trypsin OS=Sus scrofa PE=1 SV=1 Tax_Id=9823 [Sus scrofa]	Contaminant
Vbra_7021	53	169818	1	1	1	1	0.02	eupathdb|Vbra_7021|Amiloride-sensitive amine oxidase, putative n=1 Tax_Id=1169540 [Vitrella brassicaformis CCMP3155]	Transcription, regulation and signalling
Buffeli Aqueous
Accession	Score	Mass	Num. of matches	No of signif matches	No of seqs	No of signif seqs	emPAI	Description	Comments
CON_P02070	3348	15944	356	176	61	35	14438.2	sp|CON_P02070|Hemoglobin subunit beta OS=Bos taurus GN=HBB PE=1 SV=1 Tax_Id=9913 [Bos taurus]	Host protein
CON_P01966	1185	15175	170	76	60	38	5618.63	sp|CON_P01966|Hemoglobin subunit alpha OS=Bos taurus GN=HBA PE=1 SV=2 Tax_Id=9913 [Bos taurus]	Host protein
J4CCT6	927	77380	91	52	27	18	1.19	tr|J4CCT6|TOT_020000226 Heat shock protein 90 n=4 Tax_Id=869250 [Theileria orientalis strain Shintoku]	Homeostasis
J4C7N6	855	60651	105	33	30	12	1.09	tr|J4C7N6|TOT_010000811 GMP synthase n=4 Tax_Id=869250 [Theileria orientalis strain Shintoku]	Metabolism
J4D700	829	71161	92	48	39	22	1.81	tr|J4D700|TOT_020000137 Heat shock protein n=4 Tax_Id=869250 [Theileria orientalis strain Shintoku]	Homeostasis
Q27078	697	61754	76	40	35	19	1.81	tr|Q27078|Ts-hsp70 Heat shock protein n=2 Tax_Id=5877 [Theileria sergenti]	Homeostasis
A0A024W9A3	143	73868	10	6	4	3	0.14	tr|A0A024W9A3|PFTANZ_02203 Hsp70-like protein n=10 Tax_Id=1036725 [Plasmodium falciparum Tanzania (2000708)]	Homeostasis
J4C4A7	120	72528	8	2	7	2	0.09	tr|J4C4A7|TOT_040000236 Heat-shock protein HSP70 n=4 Tax_Id=869250 [Theileria orientalis strain Shintoku]	Homeostasis
CON_P00761	574	24394	94	33	10	8	2.59	sp|CON_P00761|Trypsin OS=Sus scrofa PE=1 SV=1 Tax_Id=9823 [Sus scrofa]	Contaminant
J4D5X2	552	49467	59	26	35	16	1.79	tr|J4D5X2|TOT_010000685 Elongation factor 1-alpha n=4 Tax_Id=869250 [Theileria orientalis strain Shintoku]	Translation
L1LF41	534	49292	56	27	32	17	1.99	tr|L1LF41|BEWA_037990 Elongation factor 1-alpha n=4 Tax_Id=1537102 [Babesia equi strain WA]	Translation
J4C447	399	186696	52	16	34	10	0.19	tr|J4C447|TOT_030000951 Carbamoyl phosphate synthase II n=4 Tax_Id=869250 [Theileria orientalis strain Shintoku]	Metabolism
J4D5K0	319	90411	32	16	19	11	0.48	tr|J4D5K0|TOT_010000480 Elongation factor 2 n=4 Tax_Id=869250 [Theileria orientalis strain Shintoku]	Translation
J4C4H6	310	36553	32	12	26	11	1.59	tr|J4C4H6|TOT_040000571 Glyceraldehyde-3-phosphate dehydrogenase n=4 Tax_Id=869250 [Theileria orientalis strain Shintoku]	Metabolism
J4C376	280	90477	17	8	11	5	0.19	tr|J4C376|TOT_020001035 Heat shock protein n=4 Tax_Id=869250 [Theileria orientalis strain Shintoku]	Homeostasis
J4DPR6	259	61828	19	11	12	6	0.36	tr|J4DPR6|TOT_030000432 Protein disulphide isomerase n=4 Tax_Id=869250 [Theileria orientalis strain Shintoku]	Homeostasis
J4DQ71	250	56411	14	8	9	5	0.33	tr|J4DQ71|TOT_040000325 Pyruvate kinase n=4 Tax_Id=869250 [Theileria orientalis strain Shintoku]	Metabolism
J7M825	239	54392	15	10	10	6	0.42	tr|J7M825|TOT_010000037 Hexokinase 1 n=4 Tax_Id=869250 [Theileria orientalis strain Shintoku]	Metabolism
J7MBT2	220	54620	16	10	10	6	0.42	tr|J7MBT2|TOT_010000041 Hexokinase 1 n=4 Tax_Id=869250 [Theileria orientalis strain Shintoku]	Metabolism
J4DAA3	217	48034	11	7	6	4	0.3	tr|J4DAA3|TOT_040000220 Enolase n=4 Tax_Id=869250 [Theileria orientalis strain Shintoku]	Metabolism
J4D691	191	126547	18	9	15	7	0.19	tr|J4D691|TOT_010001316 Molecular chaperone protein n=4 Tax_Id=869250 [Theileria orientalis strain Shintoku]	Protein processing and turnover
L1LFE2	66	97014	8	2	2	2	0.07	tr|L1LFE2|BEWA_041140 Heat shock family protein n=3 Tax_Id=1537102 [Babesia equi strain WA]	Homeostasis
J4C379	190	137725	39	16	28	14	0.39	tr|J4C379|TOT_020000238 Uncharacterized protein n=4 Tax_Id=869250 [Theileria orientalis strain Shintoku]	Uncharacterised protein
J4C810	117	135894	16	9	13	8	0.21	tr|J4C810|TOT_020000240 Falcilysin n=4 Tax_Id=869250 [Theileria orientalis strain Shintoku]	Metalloprotease - Haemoglobin degradation
J4DNF9	184	115479	34	12	21	11	0.36	tr|J4DNF9|TOT_010000356 Aminopeptidase N n=4 Tax_Id=869250 [Theileria orientalis strain Shintoku]	Protein processing and turnover
U6G9S3	54	121746	5	2	4	2	0.05	tr|U6G9S3|EAH_00017220 Aminopeptidase N, putative n=3 Tax_Id=5801 [Eimeria acervulina]	Protein processing and turnover
J7MEZ0	177	79100	15	7	10	6	0.27	tr|J7MEZ0|TOT_040000682 Acetyl-coenzyme A synthetase n=4 Tax_Id=869250 [Theileria orientalis strain Shintoku]	Metabolism
J4C874	175	29021	6	4	6	4	0.54	tr|J4C874|TOT_020000552 Proteasome subunit beta type n=4 Tax_Id=869250 [Theileria orientalis strain Shintoku]	Protein processing and turnover
J4CC87	169	68898	13	7	11	6	0.32	tr|J4CC87|TOT_010000427 Uncharacterized protein n=4 Tax_Id=869250 [Theileria orientalis strain Shintoku]	Uncharacterised protein
Q4N920	166	35334	10	8	7	5	0.56	tr|Q4N920|TP01_0294 60S acidic ribosomal protein, P0, putative n=4 Tax_Id=5875 [Theileria parva]	Translation
J4D6Z0	164	44926	21	7	12	6	0.64	tr|J4D6Z0|TOT_020000111 Eukaryotic translation initiation factor 4a n=4 Tax_Id=869250 [Theileria orientalis strain Shintoku]	Translation
J4D5D2	162	17229	4	4	4	4	1.04	tr|J4D5D2|TOT_010000342 Deoxyuridine 5'-triphosphate nucleotidohydrolase n=4 Tax_Id=869250 [Theileria orientalis strain Shintoku]	Metabolism
J4DPA8	161	55835	33	8	13	7	0.49	tr|J4DPA8|TOT_020000636 Adenosylhomocysteinase n=4 Tax_Id=869250 [Theileria orientalis strain Shintoku]	Metabolism
J4DNZ8	155	159301	16	8	10	6	0.13	tr|J4DNZ8|TOT_020000105 Uncharacterized protein n=4 Tax_Id=869250 [Theileria orientalis strain Shintoku]	Uncharacterised protein
J4DPB3	139	56277	3	2	3	2	0.12	tr|J4DPB3|TOT_020000661 Glycerol kinase n=4 Tax_Id=869250 [Theileria orientalis strain Shintoku]	Metabolism
J4D921	139	25553	5	3	5	3	0.44	tr|J4D921|TOT_030000408 Proteasome subunit beta type n=4 Tax_Id=869250 [Theileria orientalis strain Shintoku]	Protein processing and turnover
J7MCG4	137	21709	12	6	8	5	1.04	tr|J7MCG4|TOT_040000865 Peroxiredoxin 1 n=4 Tax_Id=869250 [Theileria orientalis strain Shintoku]	Homeostasis
J4CDC7	134	29581	5	4	4	4	0.53	tr|J4CDC7|TOT_030000173 40S ribosomal protein S3a n=4 Tax_Id=869250 [Theileria orientalis strain Shintoku]	Translation
J4D748	133	63306	7	3	7	3	0.16	tr|J4D748|TOT_020000227 Eukaryotic translation initiation factor 3 subunit L n=4 Tax_Id=869250 [Theileria orientalis strain Shintoku]	Translation
J4C4F9	133	111871	9	4	7	3	0.09	tr|J4C4F9|TOT_040000489 26S proteasome regulatory subunit n=4 Tax_Id=869250 [Theileria orientalis strain Shintoku]	Protein processing and turnover
312386671	132	29411	5	2	5	2	0.24	gi|312386671|dbj|BAJ34655.1| major piroplasm surface protein, partial n=1 Tax_Id=68886 [Theileria orientalis]	Host cell attachment and interaction
J4C2Q4	132	18910	15	8	9	6	1.67	tr|J4C2Q4|TOT_010000558 Uncharacterized protein n=4 Tax_Id=869250 [Theileria orientalis strain Shintoku]	Uncharacterised protein
J4CCK2	128	100496	12	7	12	7	0.25	tr|J4CCK2|TOT_010000992 Aconitate hydratase 3, mitochondrial n=4 Tax_Id=869250 [Theileria orientalis strain Shintoku]	Metabolism
J4C430	128	63048	8	4	5	2	0.11	tr|J4C430|TOT_030000733 Thioredoxin reductase n=4 Tax_Id=869250 [Theileria orientalis strain Shintoku]	Homeostasis
J4DPH7	127	21463	6	3	6	3	0.54	tr|J4DPH7|TOT_020000979 40S ribosomal protein S8 n=4 Tax_Id=869250 [Theileria orientalis strain Shintoku]	Translation
J4C975	125	42379	4	3	3	2	0.16	tr|J4C975|TOT_040000424 Elongation factor 1-gamma n=4 Tax_Id=869250 [Theileria orientalis strain Shintoku]	Translation
J4C2V6	124	39390	4	3	3	3	0.27	tr|J4C2V6|TOT_010000814 Splicing factor n=4 Tax_Id=869250 [Theileria orientalis strain Shintoku]	Transcription, regulation and signalling
J4D7V7	123	93181	17	4	9	1	0.04	tr|J4D7V7|TOT_020000652 Citrate synthase n=4 Tax_Id=869250 [Theileria orientalis strain Shintoku]	Metabolism
J4CCG8	122	29552	2	2	2	2	0.24	tr|J4CCG8|TOT_010000824 Proteasome subunit beta type n=4 Tax_Id=869250 [Theileria orientalis strain Shintoku]	Protein processing and turnover
J7MGU7	122	72208	9	6	8	6	0.3	tr|J7MGU7|TOT_010001228 Glutathione synthetase n=4 Tax_Id=869250 [Theileria orientalis strain Shintoku]	Metabolism
Q4UEW2	120	29294	6	3	6	3	0.38	tr|Q4UEW2|TA14115 14-3-3 protein homologue, putative n=4 Tax_Id=5874 [Theileria annulata]	Transcription, regulation and signalling
13774290	118	40681	3	2	3	2	0.17	gi|13774290|gb|AAK38829.1| actin II Tax_Id=134027 [Diophrys sp. PPR2000]	Cellular organisation and transport
J4C3M0	81	41969	4	2	3	2	0.16	tr|J4C3M0|TOT_020001102 Actin 1 n=4 Tax_Id=869250 [Theileria orientalis strain Shintoku]	Cellular organisation and transport
Q8GZE2	75	41696	9	3	8	3	0.26	tr|Q8GZE2|Actin n=2 Tax_Id=2972 [Pyrocystis lunula]	Cellular organisation and transport
S7VNC9	72	32038	8	3	7	3	0.34	tr|S7VNC9|TGGT1_411760 Actin n=3 Tax_Id=507601 [Toxoplasma gondii GT1]	Cellular organisation and transport
J4C7R5	115	109290	6	3	6	3	0.09	tr|J4C7R5|TOT_010000953 Alanine--tRNA ligase n=4 Tax_Id=869250 [Theileria orientalis strain Shintoku]	Translation
U6M593	113	51946	3	1	3	1	0.06	tr|U6M593|EMWEY_00004130 GTP binding protein, putative n=3 Tax_Id=5804 [Eimeria maxima]	Cellular organisation and transport
J4C4I6	110	18143	5	3	5	3	0.67	tr|J4C4I6|TOT_040000621 60S ribosomal protein L12 n=4 Tax_Id=869250 [Theileria orientalis strain Shintoku]	Translation
J4DPL8	110	18492	2	2	1	1	0.18	tr|J4DPL8|TOT_030000190 60S ribosomal protein L25 n=4 Tax_Id=869250 [Theileria orientalis strain Shintoku]	Translation
CON_Q6R650	109	49392	15	4	2	1	0.14	sp|CON_Q6R650|Keratin, type I cytoskeletal 25 OS=Capra hircus GN=KRT25 PE=2 SV=1 Tax_Id=9925 [Capra hircus]	Contaminant
Q4N0P4	109	22418	2	2	2	2	0.32	tr|Q4N0P4|TP03_0072 Uncharacterized protein n=4 Tax_Id=5875 [Theileria parva]	Uncharacterised protein
A0A061DBA3	108	13975	5	4	1	1	0.24	tr|A0A061DBA3|BBBOND_0201820 60S ribosomal L22e protein, putative n=2 Tax_Id=5866 [Babesia bigemina]	Translation
J4C3S5	108	17042	3	2	3	2	0.43	tr|J4C3S5|TOT_030000212 Uncharacterized protein n=4 Tax_Id=869250 [Theileria orientalis strain Shintoku]	Uncharacterised protein
J4CCC5	107	20634	25	7	15	5	1.46	tr|J4CCC5|TOT_010000613 Uncharacterized protein n=4 Tax_Id=869250 [Theileria orientalis strain Shintoku]	Uncharacterised protein
XP_001032265.1	106	145292	11	4	6	2	0.05	ref|XP_001032265.1| Ubiquitin family protein n=2 Tax_Id=5911 [Tetrahymena thermophila]	Transcription, regulation and signalling
F0VMB6	106	105548	2	1	2	1	0.03	tr|F0VMB6|NCLIV_048240 Uncharacterized protein n=4 Tax_Id=572307 [Neospora caninum (strain Liverpool)]	Uncharacterised protein
CON_P00921	105	29096	9	5	8	4	0.54	sp|CON_P00921|Carbonic anhydrase 2 OS=Bos taurus GN=CA2 PE=1 SV=3 Tax_Id=9913 [Bos taurus]	Host protein
J4C9B8	105	83798	6	2	6	2	0.08	tr|J4C9B8|TOT_040000632 Eukaryotic translation initiation factor 3 subunit B n=4 Tax_Id=869250 [Theileria orientalis strain Shintoku]	Translation
J7MCB4	103	24272	3	3	3	3	0.29	tr|J7MCB4|TOT_040000980 60S ribosomal L1/L10a protein n=4 Tax_Id=869250 [Theileria orientalis strain Shintoku]	Translation
Q4N1Z7	102	62449	1	1	1	1	0.05	tr|Q4N1Z7|TP04_0580 Uncharacterized protein n=4 Tax_Id=5875 [Theileria parva]	Uncharacterised protein
J4D6L0	101	23774	4	3	4	3	0.48	tr|J4D6L0|TOT_010001099 Superoxide dismutase n=4 Tax_Id=869250 [Theileria orientalis strain Shintoku]	Homeostasis
J4D5C2	101	20489	8	4	5	2	0.35	tr|J4D5C2|TOT_010000322 Ribosomal protein S18 n=4 Tax_Id=869250 [Theileria orientalis strain Shintoku]	Translation
Q4UCR5	100	20853	5	2	3	2	0.35	tr|Q4UCR5|TA05445 Ribosomal protein L19 n=4 Tax_Id=5874 [Theileria annulata]	Translation
J4C4D3	100	58793	5	4	3	3	0.18	tr|J4C4D3|TOT_040000365 Cytosol aminopeptidase n=4 Tax_Id=869250 [Theileria orientalis strain Shintoku]	Protein processing and turnover
J4C339	98	36795	2	1	2	1	0.09	tr|J4C339|TOT_020000042 Inorganic pyrophosphatase n=4 Tax_Id=869250 [Theileria orientalis strain Shintoku]	Metabolism
J4D965	97	50767	12	5	8	4	0.28	tr|J4D965|TOT_030000922 DEAD-box family helicase n=4 Tax_Id=869250 [Theileria orientalis strain Shintoku]	Transcription, regulation and signalling
J4C910	97	51138	3	1	3	1	0.06	tr|J4C910|TOT_040000104 Proteasome component n=4 Tax_Id=869250 [Theileria orientalis strain Shintoku]	Protein processing and turnover
J4D9B1	96	29125	3	2	3	2	0.24	tr|J4D9B1|TOT_030000929 Proteasome subunit alpha type n=4 Tax_Id=869250 [Theileria orientalis strain Shintoku]	Protein processing and turnover
J4C2K6	95	19576	2	2	2	2	0.37	tr|J4C2K6|TOT_010000323 60S ribosomal protein L11a n=4 Tax_Id=869250 [Theileria orientalis strain Shintoku]	Translation
J7MF86	94	17191	4	3	3	2	0.43	tr|J7MF86|TOT_040000882 40S ribosomal protein S15 n=4 Tax_Id=869250 [Theileria orientalis strain Shintoku]	Translation
J4C471	94	129354	9	2	9	2	0.05	tr|J4C471|TOT_040000057 Glutamate dehydrogenase n=4 Tax_Id=869250 [Theileria orientalis strain Shintoku]	Metabolism
CON_P02662	92	24513	7	6	3	3	0.46	sp|CON_P02662|Alpha-S1-casein OS=Bos taurus GN=CSN1S1 PE=1 SV=2 Tax_Id=9913 [Bos taurus]	Host protein
Q4N7Q5	92	44911	4	1	4	1	0.07	tr|Q4N7Q5|TP01_0765 Eukaryotic translation initiation factor 4A, putative n=4 Tax_Id=5875 [Theileria parva]	Translation
J4DNG9	92	82567	3	2	3	2	0.08	tr|J4DNG9|TOT_010000404 Glycyl-tRNA synthetase n=4 Tax_Id=869250 [Theileria orientalis strain Shintoku]	Translation
J7MGS3	91	23778	6	2	6	2	0.3	tr|J7MGS3|TOT_010000174 Proteasome subunit beta type n=4 Tax_Id=869250 [Theileria orientalis strain Shintoku]	Protein processing and turnover
J4DA68	90	31345	5	3	5	3	0.35	tr|J4DA68|TOT_040000181 40S ribosomal protein SA n=4 Tax_Id=869250 [Theileria orientalis strain Shintoku]	Translation
J4C848	90	94167	2	1	2	1	0.03	tr|J4C848|TOT_020000425 Uncharacterized protein n=4 Tax_Id=869250 [Theileria orientalis strain Shintoku]	Uncharacterised protein
J4C2P6	90	47298	7	3	7	3	0.22	tr|J4C2P6|TOT_010000519 Ribosomal protein L3 n=4 Tax_Id=869250 [Theileria orientalis strain Shintoku]	Translation
J4CE14	90	54809	4	3	3	2	0.12	tr|J4CE14|TOT_040000473 Vacuolar ATP synthase subunit beta n=4 Tax_Id=869250 [Theileria orientalis strain Shintoku]	Cellular organisation and transport
J7M851	90	100822	5	3	3	2	0.07	tr|J7M851|TOT_010000091 Protein transport protein sec24-like n=4 Tax_Id=869250 [Theileria orientalis strain Shintoku]	Cellular organisation and transport
Q4N0W4	90	79541	4	2	3	1	0.04	tr|Q4N0W4|TP03_0137 Methionyl-tRNA synthetase, putative n=4 Tax_Id=5875 [Theileria parva]	Translation
J9HXP0	90	397652	12	3	5	1	0.01	tr|J9HXP0|OXYTRI_14617 Uncharacterized protein n=2 Tax_Id=94289 [Oxytricha trifallax]	Uncharacterised protein
J4CDY1	90	51428	8	4	7	4	0.28	tr|J4CDY1|TOT_040000942 Isocitrate dehydrogenase [NADP] n=4 Tax_Id=869250 [Theileria orientalis strain Shintoku]	Metabolism
A0A078AQM3	74	47646	4	3	3	3	0.22	tr|A0A078AQM3|Contig18949.g912 Uncharacterized protein n=2 Tax_Id=5949 [Stylonychia lemnae]	Uncharacterised protein
J4CE53	89	13139	4	1	3	1	0.26	tr|J4CE53|TOT_040000661 60S ribosomal protein L36 n=4 Tax_Id=869250 [Theileria orientalis strain Shintoku]	Translation
J4CE31	88	128207	12	2	12	2	0.05	tr|J4CE31|TOT_040000552 Ran-binding protein n=4 Tax_Id=869250 [Theileria orientalis strain Shintoku]	Cellular organisation and transport
J4CDX0	87	29451	12	6	9	6	0.9	tr|J4CDX0|TOT_040000257 40S ribosomal protein S4 n=4 Tax_Id=869250 [Theileria orientalis strain Shintoku]	Translation
J4C344	86	30451	5	3	5	3	0.36	tr|J4C344|TOT_020000067 60S ribosomal protein L7a n=4 Tax_Id=869250 [Theileria orientalis strain Shintoku]	Translation
L0B0V2	86	24071	1	1	1	1	0.14	tr|L0B0V2|BEWA_008940 40S ribosomal protein S3, putative n=3 Tax_Id=1537102 [Babesia equi strain WA]	Translation
J4C7U8	85	35067	6	5	6	5	0.57	tr|J4C7U8|TOT_010001117 L-lactate dehydrogenase n=4 Tax_Id=869250 [Theileria orientalis strain Shintoku]	Metabolism
J4C9B3	85	43701	3	1	3	1	0.08	tr|J4C9B3|TOT_040000608 26S proteasome subunit n=4 Tax_Id=869250 [Theileria orientalis strain Shintoku]	Protein processing and turnover
J4DAS7	85	63857	12	3	6	3	0.16	tr|J4DAS7|TOT_040000535 Uncharacterized protein n=4 Tax_Id=869250 [Theileria orientalis strain Shintoku]	Uncharacterised protein
J4DPB7	85	467903	26	5	22	5	0.04	tr|J4DPB7|TOT_020000680 Uncharacterized protein n=4 Tax_Id=869250 [Theileria orientalis strain Shintoku]	Uncharacterised protein
J4DPF6	85	66560	5	3	5	3	0.15	tr|J4DPF6|TOT_020001015 CTP synthase n=4 Tax_Id=869250 [Theileria orientalis strain Shintoku]	Metabolism
J4CCD7	84	14441	4	3	4	3	0.52	tr|J4CCD7|TOT_010000672 60S ribosomal protein L14 n=4 Tax_Id=869250 [Theileria orientalis strain Shintoku]	Translation
J4DPA6	84	41310	10	6	7	5	0.47	tr|J4DPA6|TOT_020001075 Uncharacterized protein n=4 Tax_Id=869250 [Theileria orientalis strain Shintoku]	Uncharacterised protein
J4DAE8	83	59846	4	2	3	2	0.11	tr|J4DAE8|TOT_040000310 Phenylalanyl-tRNA synthetase n=4 Tax_Id=869250 [Theileria orientalis strain Shintoku]	Translation
J4D5A4	83	38396	6	3	5	3	0.28	tr|J4D5A4|TOT_010001237 Glycerol-3-phosphate dehydrogenase [NAD(+)] n=4 Tax_Id=869250 [Theileria orientalis strain Shintoku]	Metabolism
Q4N655	83	35199	5	2	5	2	0.2	sp|Q4N655|RPL5 60S ribosomal protein L5 n=4 Tax_Id=5875 [Theileria parva]	Translation
J4DPT1	82	63204	10	3	9	2	0.11	tr|J4DPT1|TOT_030000507 Glucose-6-phosphate isomerase n=4 Tax_Id=869250 [Theileria orientalis strain Shintoku]	Metabolism
J4D910	81	90372	8	2	7	2	0.07	tr|J4D910|TOT_030000388 Adenosine monophosphate deaminase 2 (Isoform L) isoform 3 n=4 Tax_Id=869250 [Theileria orientalis strain Shintoku]	Metabolism
J4C8A1	81	86003	7	2	6	1	0.04	tr|J4C8A1|TOT_020000684 Protein transport protein n=4 Tax_Id=869250 [Theileria orientalis strain Shintoku]	Cellular organisation and transport
Q4UAZ2	80	25680	3	2	3	2	0.28	tr|Q4UAZ2|TA18320 Proteasome subunit alpha type n=4 Tax_Id=5874 [Theileria annulata]	Protein processing and turnover
J4DNE9	80	50724	8	3	8	3	0.21	tr|J4DNE9|TOT_010000307 Eukaryotic translation initiation factor 2 subunit gamma n=4 Tax_Id=869250 [Theileria orientalis strain Shintoku]	Translation
Q4N436	80	21934	2	1	2	1	0.15	tr|Q4N436|TP02_0803 60S ribosomal protein L18a n=4 Tax_Id=5875 [Theileria parva]	Translation
J4C3I4	79	101838	2	2	2	2	0.07	tr|J4C3I4|TOT_020000751 Uncharacterized protein n=4 Tax_Id=869250 [Theileria orientalis strain Shintoku]	Uncharacterised protein
J4C9B4	79	36544	2	2	2	2	0.19	tr|J4C9B4|TOT_040000613 G protein beta subunit-like polypeptide n=4 Tax_Id=869250 [Theileria orientalis strain Shintoku]	Transcription, regulation and signalling
J4C3Y0	79	19957	1	1	1	1	0.17	tr|J4C3Y0|TOT_030000484 Uncharacterized protein n=4 Tax_Id=869250 [Theileria orientalis strain Shintoku]	Uncharacterised protein
J4C8J4	79	15635	9	3	6	3	0.8	tr|J4C8J4|TOT_030000154 40S ribosomal protein S12 n=4 Tax_Id=869250 [Theileria orientalis strain Shintoku]	Translation
A0A078BCM3	79	213177	5	1	3	1	0.02	tr|A0A078BCM3|Contig2520.g2711 Udp-glucose:glycoprotein glucosyltransferase n=2 Tax_Id=5949 [Stylonychia lemnae]	Protein processing and turnover
J4C3Q0	79	44441	1	1	1	1	0.07	tr|J4C3Q0|TOT_030000088 Uncharacterized protein n=4 Tax_Id=869250 [Theileria orientalis strain Shintoku]	Uncharacterised protein
J4DNS9	78	35340	3	3	3	3	0.31	tr|J4DNS9|TOT_010001331 Phosphoribosyl pyrophosphate synthetase n=4 Tax_Id=869250 [Theileria orientalis strain Shintoku]	Metabolism
J4DAV5	78	22870	3	1	3	1	0.15	tr|J4DAV5|TOT_040000575 60S ribosomal protein L13 n=4 Tax_Id=869250 [Theileria orientalis strain Shintoku]	Translation
J4CC71	78	56182	5	3	3	2	0.12	tr|J4CC71|TOT_010000349 Serine hydroxymethyltransferase n=4 Tax_Id=869250 [Theileria orientalis strain Shintoku]	Metabolism
J4DPR1	78	34001	2	1	2	1	0.1	tr|J4DPR1|TOT_030000407 Nucleosome assembly protein n=4 Tax_Id=869250 [Theileria orientalis strain Shintoku]	Cell division
J4C7S3	68	28040	8	2	6	2	0.25	tr|J4C7S3|TOT_010000993 60S ribosomal protein L2/L8 n=4 Tax_Id=869250 [Theileria orientalis strain Shintoku]	Translation
J4C3X6	76	58228	4	2	4	2	0.12	tr|J4C3X6|TOT_030000464 Lysine--tRNA ligase n=4 Tax_Id=869250 [Theileria orientalis strain Shintoku]	Translation
J4CD29	76	399879	10	4	6	2	0.02	tr|J4CD29|TOT_020000678 Uncharacterized protein n=4 Tax_Id=869250 [Theileria orientalis strain Shintoku]	Uncharacterised protein
Q4N9Q9	75	56560	6	3	5	2	0.12	tr|Q4N9Q9|TP01_0055 DEAD box RNA helicase, putative n=4 Tax_Id=5875 [Theileria parva]	Transcription, regulation and signalling
U6H3Y5	75	425207	6	1	6	1	0.01	tr|U6H3Y5|EPH_0055910 Hydrocephalus-inducing protein like protein, related n=3 Tax_Id=51316 [Eimeria praecox]	Cellular organisation and transport
J7MGT8	73	120551	10	2	9	2	0.05	tr|J7MGT8|TOT_010000218 Eukaryotic translation initiation factor 3 subunit A n=4 Tax_Id=869250 [Theileria orientalis strain Shintoku]	Translation
J4DPG2	72	17088	1	1	1	1	0.2	tr|J4DPG2|TOT_020000903 Ubiquitin-related modifier 1 homolog n=4 Tax_Id=869250 [Theileria orientalis strain Shintoku]	Protein processing and turnover
A7Y487	72	11722	3	1	2	1	0.29	tr|A7Y487|Ribosomal protein L44 n=2 Tax_Id=94289 [Oxytricha trifallax]	Translation
Q4N2A8	72	34152	2	1	2	1	0.1	tr|Q4N2A8|TP04_0444 Uncharacterized protein n=4 Tax_Id=5875 [Theileria parva]	Uncharacterised protein
J4C4A8	72	54390	3	1	3	1	0.06	tr|J4C4A8|TOT_040000241 RuvB-like DNA repair helicase n=4 Tax_Id=869250 [Theileria orientalis strain Shintoku]	DNA replication and repair
J4C4H3	71	49480	1	1	1	1	0.07	tr|J4C4H3|TOT_040000556 Tyrosyl-tRNA synthetase n=4 Tax_Id=869250 [Theileria orientalis strain Shintoku]	Translation
J7MGP4	71	104564	3	1	3	1	0.03	tr|J7MGP4|TOT_010000119 Uncharacterized protein n=4 Tax_Id=869250 [Theileria orientalis strain Shintoku]	Uncharacterised protein
J4C8T9	71	54858	6	3	4	2	0.12	tr|J4C8T9|TOT_030000630 Inosine-5'-monophosphate dehydrogenase n=4 Tax_Id=869250 [Theileria orientalis strain Shintoku]	Metabolism
J4C9A9	71	21740	4	2	3	1	0.15	tr|J4C9A9|TOT_040000588 40S ribosomal protein S9 n=4 Tax_Id=869250 [Theileria orientalis strain Shintoku]	Translation
J4DAW2	71	117671	7	1	7	1	0.03	tr|J4DAW2|TOT_040000585 Transcription modulator n=4 Tax_Id=869250 [Theileria orientalis strain Shintoku]	Transcription, regulation and signalling
J4D5W3	70	46681	1	1	1	1	0.07	tr|J4D5W3|TOT_010000670 Succinyl-Coa ligase, subunit n=4 Tax_Id=869250 [Theileria orientalis strain Shintoku]	Metabolism
CON_O77727	70	48740	26	4	6	3	0.22	sp|CON_O77727|Keratin, type I cytoskeletal 15 OS=Ovis aries GN=KRT15 PE=2 SV=1 Tax_Id=9940 [Ovis aries]	Contaminant
J4C3B5	70	16429	3	2	3	2	0.45	tr|J4C3B5|TOT_020000413 Nucleoside diphosphate kinase n=4 Tax_Id=869250 [Theileria orientalis strain Shintoku]	Metabolism
Q4N7Y3	70	105789	1	1	1	1	0.03	tr|Q4N7Y3|TP01_0687 Coatomer beta subunit, putative n=4 Tax_Id=5875 [Theileria parva]	Cellular organisation and transport
J4C2U2	70	43173	1	1	1	1	0.08	tr|J4C2U2|TOT_010000745 Actin n=4 Tax_Id=869250 [Theileria orientalis strain Shintoku]	Cellular organisation and transport
J4DA98	69	66116	2	1	2	1	0.05	tr|J4DA98|TOT_040000210 Vacuolar H+-ATPase, a subunit n=4 Tax_Id=869250 [Theileria orientalis strain Shintoku]	Cellular organisation and transport
J4C820	69	132593	9	1	9	1	0.02	tr|J4C820|TOT_020000290 Isoleucyl-tRNA synthetase n=4 Tax_Id=869250 [Theileria orientalis strain Shintoku]	Translation
Q4UBQ9	69	38157	2	1	2	1	0.09	tr|Q4UBQ9|TA05025 Putative uncharacterized protein n=4 Tax_Id=5874 [Theileria annulata]	Uncharacterised protein
J4C4G4	69	49770	4	2	4	2	0.14	tr|J4C4G4|TOT_040000511 Eukaryotic translation initiation factor 3 subunit M n=4 Tax_Id=869250 [Theileria orientalis strain Shintoku]	Translation
U6H5N2	69	79940	1	1	1	1	0.04	tr|U6H5N2|EPH_0024370 Uncharacterized protein n=3 Tax_Id=51316 [Eimeria praecox]	Uncharacterised protein
Q4U9R9	69	14293	4	1	2	1	0.24	tr|Q4U9R9|TA08205 60S ribosomal protein L22, putative n=4 Tax_Id=5874 [Theileria annulata]	Translation
J4CE27	69	134354	7	1	7	1	0.02	tr|J4CE27|TOT_040000532 DNA-directed RNA polymerase n=4 Tax_Id=869250 [Theileria orientalis strain Shintoku]	Transcription, regulation and signalling
J4D5N5	68	30454	6	2	6	2	0.23	tr|J4D5N5|TOT_010001272 Proteasome subunit alpha type n=4 Tax_Id=869250 [Theileria orientalis strain Shintoku]	Protein processing and turnover
J4C844	68	58078	1	1	1	1	0.06	tr|J4C844|TOT_020001057 Uncharacterized protein n=4 Tax_Id=869250 [Theileria orientalis strain Shintoku]	Uncharacterised protein
U6LET9	68	46917	2	1	1	1	0.07	tr|U6LET9|EBH_0017580 Uncharacterized protein n=3 Tax_Id=51314 [Eimeria brunetti]	Uncharacterised protein
J4CCQ5	68	18492	7	3	4	2	0.39	tr|J4CCQ5|TOT_020000073 60S ribosomal protein L21 n=4 Tax_Id=869250 [Theileria orientalis strain Shintoku]	Translation
J4DAN7	68	58135	8	1	7	1	0.06	tr|J4DAN7|TOT_040000476 Uncharacterized protein n=4 Tax_Id=869250 [Theileria orientalis strain Shintoku]	Uncharacterised protein
557184688	68	108411	1	1	1	1	0.03	gi|557184688|emb|CDJ57829.1| M16 family peptidase, putative, partial n=2 Tax_Id=5804 [Eimeria maxima]	Protein processing and turnover
Q4UF61	68	433862	7	1	5	1	0.01	tr|Q4UF61|TA14665 Putative uncharacterized protein n=4 Tax_Id=5874 [Theileria annulata]	Uncharacterised protein
J4DNH8	68	157566	9	1	6	1	0.02	tr|J4DNH8|TOT_010000449 Uncharacterized protein n=4 Tax_Id=869250 [Theileria orientalis strain Shintoku]	Uncharacterised protein
J4C7N4	67	39417	4	1	4	1	0.08	tr|J4C7N4|TOT_010000801 Eukaryotic translation initiation factor 2 subunit alpha n=4 Tax_Id=869250 [Theileria orientalis strain Shintoku]	Translation
EfaB_PLUS_40565.g2565	67	44904	2	1	2	1	0.07	eupathdb|EfaB_PLUS_40565.g2565|unspecified product n=1 Tax_Id=84963 [Eimeria falciformis Bayer Haberkorn 1970]	Uncharacterised protein
J4D8C7	67	87586	3	2	2	1	0.04	tr|J4D8C7|TOT_020000964 Glucosamine--fructose-6-phosphate aminotransferase n=4 Tax_Id=869250 [Theileria orientalis strain Shintoku]	Metabolism
A0A077XHC2	67	16065	3	1	3	1	0.21	tr|A0A077XHC2|PBANKA_123100 40S ribosomal protein S14, putative n=2 Tax_Id=5823 [Plasmodium berghei (strain Anka)]	Translation
U6KRJ8	66	13114	5	1	1	1	0.26	tr|U6KRJ8|ETH_00015420 Uncharacterized protein n=3 Tax_Id=5802 [Eimeria tenella]	Uncharacterised protein
A0A078B591	66	19942	2	1	1	1	0.17	tr|A0A078B591|Contig11512.g12321 Uncharacterized protein n=2 Tax_Id=5949 [Stylonychia lemnae]	Uncharacterised protein
L1LDE0	66	16176	1	1	1	1	0.21	tr|L1LDE0|BEWA_052480 40S ribosomal protein S23, putative n=3 Tax_Id=1537102 [Babesia equi strain WA]	Translation
A0DTT8	65	20843	3	1	3	1	0.16	tr|A0DTT8|GSPATT00020137001 Chromosome undetermined scaffold_63, whole genome shotgun sequence n=3 Tax_Id=5888 [Paramecium tetraurelia]	Uncharacterised protein
J4C497	64	113527	6	2	6	2	0.06	tr|J4C497|TOT_040000187 Valyl-tRNA synthetase n=4 Tax_Id=869250 [Theileria orientalis strain Shintoku]	Translation
XP_001025805.1	65	55189	3	1	2	1	0.06	ref|XP_001025805.1| hypothetical protein TTHERM_01355280 n=2 Tax_Id=5911 [Tetrahymena thermophila]	Uncharacterised protein
A0DLT2	65	148317	1	1	1	1	0.02	tr|A0DLT2|GSPATT00039631001 Chromosome undetermined scaffold_556, whole genome shotgun sequence n=3 Tax_Id=5888 [Paramecium tetraurelia]	Uncharacterised protein
A0A077TMM7	65	273644	5	1	4	1	0.01	tr|A0A077TMM7|PCHAS_060740 Uncharacterized protein n=3 Tax_Id=31271 [Plasmodium chabaudi chabaudi]	Uncharacterised protein
J4DP86	65	26617	1	1	1	1	0.12	tr|J4DP86|TOT_020000534 Uncharacterized protein n=4 Tax_Id=869250 [Theileria orientalis strain Shintoku]	Uncharacterised protein
J4C8D3	64	77778	4	1	3	1	0.04	tr|J4C8D3|TOT_020000843 Asparaginyl-tRNA synthetase n=4 Tax_Id=869250 [Theileria orientalis strain Shintoku]	Translation
J4C7Q3	64	73102	8	3	7	3	0.14	tr|J4C7Q3|TOT_010000894 Polyadenylate-binding protein n=4 Tax_Id=869250 [Theileria orientalis strain Shintoku]	Transcription, regulation and signalling
J4CDB7	64	29936	4	2	4	2	0.23	tr|J4CDB7|TOT_030000123 60S ribosomal protein L7 n=4 Tax_Id=869250 [Theileria orientalis strain Shintoku]	Translation
J4CDM7	64	18563	3	1	3	1	0.18	tr|J4CDM7|TOT_030000674 Adenylyl cyclase-associated protein n=4 Tax_Id=869250 [Theileria orientalis strain Shintoku]	Cellular organisation and transport
Q4N358	64	53371	2	1	2	1	0.06	tr|Q4N358|TP04_0129 Structure specific recognition protein, putative n=4 Tax_Id=5875 [Theileria parva]	DNA replication and repair
U6K5I6	64	18232	1	1	1	1	0.18	tr|U6K5I6|EMH_0080030 Uncharacterized protein n=3 Tax_Id=44415 [Eimeria mitis]	Uncharacterised protein
Q4N4P0	64	29518	3	1	3	1	0.11	tr|Q4N4P0|TP02_0600 Proliferating cell nuclear antigen n=4 Tax_Id=5875 [Theileria parva]	DNA replication and repair
EfaB_MINUS_10843.g952	64	156759	3	1	2	1	0.02	eupathdb|EfaB_MINUS_10843.g952|unspecified product n=1 Tax_Id=84963 [Eimeria falciformis Bayer Haberkorn 1970]	Uncharacterised protein
Q4UHP7	64	48260	3	1	3	1	0.07	tr|Q4UHP7|TA06255 26S proteasome subunit, putative n=4 Tax_Id=5874 [Theileria annulata]	Protein processing and turnover
J4DPC0	63	107915	5	1	4	1	0.03	tr|J4DPC0|TOT_020000695 Ubiquitin-activating enzyme E1 n=4 Tax_Id=869250 [Theileria orientalis strain Shintoku]	Protein processing and turnover
J4C495	63	18433	1	1	1	1	0.18	tr|J4C495|TOT_040000178 40S ribosomal protein S27a n=4 Tax_Id=869250 [Theileria orientalis strain Shintoku]	Translation
C5KKK8	63	21727	3	2	1	1	0.15	tr|C5KKK8|Pmar_PMAR023446 Putative uncharacterized protein n=3 Tax_Id=423536 [Perkinsus marinus (strain ATCC 50983 / TXsc)]	Uncharacterised protein
A0A078APJ2	63	44433	4	1	1	1	0.07	tr|A0A078APJ2|Contig18156.g19298 Uncharacterized protein n=2 Tax_Id=5949 [Stylonychia lemnae]	Uncharacterised protein
J7MGW7	63	43707	1	1	1	1	0.08	tr|J7MGW7|TOT_040000713 CTP-phosphoethanolamine cytidylyltransferase n=4 Tax_Id=869250 [Theileria orientalis strain Shintoku]	Metabolism
J7M4K3	63	80972	2	1	2	1	0.04	tr|J7M4K3|TOT_010000152 Prolyl-tRNA synthetase n=4 Tax_Id=869250 [Theileria orientalis strain Shintoku]	Translation
J4DPY3	63	28005	2	1	2	1	0.12	tr|J4DPY3|TOT_030000766 4-methyl-5(B-hydroxyethyl)-thiazol monophosphate biosynthesis enzyme n=4 Tax_Id=869250 [Theileria orientalis strain Shintoku]	Metabolism
CON_P02769	63	69248	4	2	4	2	0.1	sp|CON_P02769|Serum albumin OS=Bos taurus GN=ALB PE=1 SV=4 Tax_Id=9913 [Bos taurus]	Host protein
U6K256	62	43313	1	1	1	1	0.08	tr|U6K256|EMH_0069880 Uncharacterized protein n=3 Tax_Id=44415 [Eimeria mitis]	Uncharacterised protein
U6MTD0	62	240475	3	1	3	1	0.01	tr|U6MTD0|ENH_00009340 Uncharacterized protein n=3 Tax_Id=51315 [Eimeria necatrix]	Uncharacterised protein
J9I6G9	62	79645	3	1	1	1	0.04	tr|J9I6G9|OXYTRI_10158 B-box zinc finger family protein n=2 Tax_Id=94289 [Oxytricha trifallax]	Protein processing and turnover
A0DLH0	62	488439	7	1	5	1	0.01	tr|A0DLH0|GSPATT00018204001 Chromosome undetermined scaffold_55, whole genome shotgun sequence n=3 Tax_Id=5888 [Paramecium tetraurelia]	Uncharacterised protein
J4C3J1	62	27757	3	1	2	1	0.12	tr|J4C3J1|TOT_020000786 Ribosomal protein S2 n=4 Tax_Id=869250 [Theileria orientalis strain Shintoku]	Translation
Q4N3I4	62	60398	6	4	3	1	0.05	tr|Q4N3I4|TP04_0908 Importin subunit alpha n=4 Tax_Id=5875 [Theileria parva]	Cellular organisation and transport
Q4N067	62	50771	2	1	2	1	0.06	tr|Q4N067|TP03_0284 Cysteine proteinase, putative n=4 Tax_Id=5875 [Theileria parva]	Protein processing and turnover
L1LFE7	62	88465	6	1	3	1	0.04	tr|L1LFE7|BEWA_041190 Cell division cycle protein 48, putative n=3 Tax_Id=1537102 [Babesia equi strain WA]	Cell division
402691605	62	56107	3	1	3	1	0.06	gi|402691605|dbj|BAM37622.1| chaperonin-containing t-complex polypeptide 1, partial n=1 Tax_Id=68886 [Theileria orientalis]Chaperone	Protein processing and turnover
A0A023B4K5	61	44639	2	1	2	1	0.07	tr|A0A023B4K5|GNI_100660 Phosphoglycerate kinase n=3 Tax_Id=110365 [Gregarina niphandrodes]	Metabolism
XP_001010812.2	61	136355	5	1	5	1	0.02	ref|XP_001010812.2| Beta-tubulin cofactor D family protein n=2 Tax_Id=5911 [Tetrahymena thermophila]	Cellular organisation and transport
J4C877	61	164932	4	1	4	1	0.02	tr|J4C877|TOT_020000567 Pyrophosphate--fructose 6-phosphate 1-phosphotransferase subunit alpha n=4 Tax_Id=869250 [Theileria orientalis strain Shintoku]	Metabolism
A0DBY7	61	147663	2	1	2	1	0.02	tr|A0DBY7|GSPATT00015431001 Chromosome undetermined scaffold_45, whole genome shotgun sequence n=3 Tax_Id=5888 [Paramecium tetraurelia]	Uncharacterised protein
A0A077XC18	61	145944	2	1	2	1	0.02	tr|A0A077XC18|PCHAS_091450 Insulinase, putative n=3 Tax_Id=31271 [Plasmodium chabaudi chabaudi]	Protein processing and turnover
A0C2F3	61	110821	4	1	4	1	0.03	tr|A0C2F3|GSPATT00034448001 Chromosome undetermined scaffold_144, whole genome shotgun sequence n=3 Tax_Id=5888 [Paramecium tetraurelia]	Uncharacterised protein
W7AHQ8	61	188767	2	1	2	1	0.02	tr|W7AHQ8|YYG_03317 Uncharacterized protein n=2 Tax_Id=138298 [Plasmodium vinckei petteri]	Uncharacterised protein
J4C8X8	61	40146	3	1	2	1	0.08	tr|J4C8X8|TOT_030000826 Uncharacterized protein n=4 Tax_Id=869250 [Theileria orientalis strain Shintoku]	Uncharacterised protein
Q4N8G3	60	17114	2	2	2	2	0.43	tr|Q4N8G3|TP01_0508 Ubiquitin-protein ligase, putative n=4 Tax_Id=5875 [Theileria parva]	Post-translational modification
PF3D7_0833300	60	45623	1	1	1	1	0.07	eupathdb|PF3D7_0833300|erythrocyte membrane protein 1 (PfEMP1), exon2, pseudogene n=1 Tax_Id=36329 [Plasmodium falciparum 3D7]	Host cell attachment and interaction
L0AX88	60	17972	7	1	2	1	0.19	tr|L0AX88|BEWA_023530 Uncharacterized protein n=3 Tax_Id=1537102 [Babesia equi strain WA]	Uncharacterised protein
C5LD53	60	51955	3	1	3	1	0.06	tr|C5LD53|Pmar_PMAR029575 Putative uncharacterized protein n=3 Tax_Id=423536 [Perkinsus marinus (strain ATCC 50983 / TXsc)]	Uncharacterised protein
J4C392	60	91859	7	2	7	2	0.07	tr|J4C392|TOT_020000303 Glutaminyl-tRNA synthetase n=4 Tax_Id=869250 [Theileria orientalis strain Shintoku]	Translation
J9IIV0	59	142937	1	1	1	1	0.02	tr|J9IIV0|OXYTRI_24005 Uncharacterized protein n=2 Tax_Id=94289 [Oxytricha trifallax]	Uncharacterised protein
I7MEH3	59	99913	3	1	3	1	0.03	tr|I7MEH3|TTHERM_00189270 LNS2 (Lipin/Ned1/SMP2) protein n=2 Tax_Id=312017 [Tetrahymena thermophila (strain SB210)]Plasmid maintenance	Uncharacterised protein
J7MEX4	59	123289	8	2	7	2	0.05	tr|J7MEX4|TOT_010001232 Importin beta n=4 Tax_Id=869250 [Theileria orientalis strain Shintoku]	Cellular organisation and transport
J4DPG7	59	37849	2	1	2	1	0.09	tr|J4DPG7|TOT_020000928 FKBP-type peptidyl-prolyl cis-trans isomerase n=4 Tax_Id=869250 [Theileria orientalis strain Shintoku]Chaperone	Protein processing and turnover
J7MC36	59	26390	8	2	5	1	0.13	tr|J7MC36|TOT_010001227 Peptidyl-prolyl cis-trans isomerase n=4 Tax_Id=869250 [Theileria orientalis strain Shintoku]	Protein processing and turnover
J4DNS1	59	96705	7	1	7	1	0.03	tr|J4DNS1|TOT_010000904 Threonyl-tRNA synthetase n=4 Tax_Id=869250 [Theileria orientalis strain Shintoku]	Translation
J4C385	59	60840	4	1	3	1	0.05	tr|J4C385|TOT_020000268 T-complex protein 1 epsilon subunit n=4 Tax_Id=869250 [Theileria orientalis strain Shintoku]	Protein processing and turnover
J4D814	59	21255	3	2	2	1	0.16	tr|J4D814|TOT_020000755 60S ribosomal protein L18 n=4 Tax_Id=869250 [Theileria orientalis strain Shintoku]	Translation
J4C8M8	59	100141	4	2	4	2	0.07	tr|J4C8M8|TOT_030000324 Ribonucleoside-diphosphate reductase n=4 Tax_Id=869250 [Theileria orientalis strain Shintoku]	DNA replication and repair
F0VMV6	59	213540	2	1	2	1	0.02	tr|F0VMV6|NCLIV_054770 Putative uncharacterized protein n=4 Tax_Id=572307 [Neospora caninum (strain Liverpool)]	Uncharacterised protein
J7MGR9	58	27071	3	1	3	1	0.12	tr|J7MGR9|TOT_010000164 2-cys peroxiredoxin n=4 Tax_Id=869250 [Theileria orientalis strain Shintoku]	Homeostasis
EfaB_MINUS_22284.g1900	58	81566	6	1	3	1	0.04	eupathdb|EfaB_MINUS_22284.g1900|unspecified product n=1 Tax_Id=84963 [Eimeria falciformis Bayer Haberkorn 1970]	Uncharacterised protein
Q5CDY8	58	38611	3	1	3	1	0.09	tr|Q5CDY8|Chro.70417 P36-like protein n=4 Tax_Id=237895 [Cryptosporidium hominis]	Uncharacterised protein
J4C807	55	20392	4	2	3	2	0.35	tr|J4C807|TOT_020001000 ADP-ribosylation factor n=4 Tax_Id=869250 [Theileria orientalis strain Shintoku]	Transcription, regulation and signalling
J4CCY7	58	25801	3	2	3	2	0.27	tr|J4CCY7|TOT_020000474 Uncharacterized protein n=4 Tax_Id=869250 [Theileria orientalis strain Shintoku]	Uncharacterised protein
Q4N6F3	58	20658	1	1	1	1	0.16	tr|Q4N6F3|TP01_1217 Uncharacterized protein n=4 Tax_Id=5875 [Theileria parva]	Uncharacterised protein
U6GJU8	58	24082	1	1	1	1	0.14	tr|U6GJU8|EAH_00001820 Uncharacterized protein n=3 Tax_Id=5801 [Eimeria acervulina]	Uncharacterised protein
Q4N8S4	58	56212	1	1	1	1	0.06	tr|Q4N8S4|TP01_0390 Serine hydroxymethyltransferase n=4 Tax_Id=5875 [Theileria parva]	Metabolism
J4CDT9	58	26240	3	1	2	1	0.13	tr|J4CDT9|TOT_040000103 Proteasome subunit alpha type n=4 Tax_Id=869250 [Theileria orientalis strain Shintoku]	Protein processing and turnover
J4CE23	57	45914	3	1	3	1	0.07	tr|J4CE23|TOT_040000512 26S proteasome regulatory subunit n=4 Tax_Id=869250 [Theileria orientalis strain Shintoku]	Protein processing and turnover
J7MGV8	57	8347	1	1	1	1	0.42	tr|J7MGV8|TOT_040000684 Thioredoxin n=4 Tax_Id=869250 [Theileria orientalis strain Shintoku]	Homeostasis
J4DAA7	53	28736	3	2	3	2	0.24	tr|J4DAA7|TOT_040000230 Phosphoglycerate mutase n=4 Tax_Id=869250 [Theileria orientalis strain Shintoku]	Metabolism
J4C9B1	57	19905	7	2	3	2	0.37	tr|J4C9B1|TOT_040000598 Uncharacterized protein n=4 Tax_Id=869250 [Theileria orientalis strain Shintoku]	Uncharacterised protein
J7MEU2	57	37686	2	1	2	1	0.09	tr|J7MEU2|TOT_010000202 Uncharacterized protein n=4 Tax_Id=869250 [Theileria orientalis strain Shintoku]	Uncharacterised protein
W4IVD6	57	68442	4	1	2	1	0.05	tr|W4IVD6|PFUGPA_03808 Uncharacterized protein n=2 Tax_Id=57270 [Plasmodium falciparum (isolate Palo Alto / Uganda)]	Uncharacterised protein
J4C837	56	62774	3	1	3	1	0.05	tr|J4C837|TOT_020000371 Eukaryotic translation initiation factor 3 subunit E n=4 Tax_Id=869250 [Theileria orientalis strain Shintoku]	Translation
J4CDA6	56	25697	2	1	2	1	0.13	tr|J4CDA6|TOT_030000069 Proteasome subunit alpha type n=4 Tax_Id=869250 [Theileria orientalis strain Shintoku]	Protein processing and turnover
A0A086J835	56	96945	4	1	2	1	0.03	tr|A0A086J835|TGP89_220208A Uncharacterized protein n=2 Tax_Id=943119 [Toxoplasma gondii p89]	Uncharacterised protein
A0A023AZN8	56	72143	5	1	2	1	0.05	tr|A0A023AZN8|GNI_149470 Uncharacterized protein n=3 Tax_Id=110365 [Gregarina niphandrodes]	Uncharacterised protein
L1LD66	56	15226	2	1	2	1	0.22	tr|L1LD66|BEWA_052740 40S ribosomal protein S17, putative n=3 Tax_Id=1537102 [Babesia equi strain WA]	Translation
J4C2L2	56	104306	4	2	4	2	0.06	tr|J4C2L2|TOT_010000353 Coatomer complex subunit beta n=4 Tax_Id=869250 [Theileria orientalis strain Shintoku]	Cellular organisation and transport
J4C4E3	56	58798	2	2	1	1	0.06	tr|J4C4E3|TOT_040000412 Bifunctional dihydrofolate reductase/thymidilate synthase n=4 Tax_Id=869250 [Theileria orientalis strain Shintoku]	Metabolism
A0BFT8	55	31740	5	1	2	1	0.1	tr|A0BFT8|GSPATT00028440001 Chromosome undetermined scaffold_105, whole genome shotgun sequence n=3 Tax_Id=5888 [Paramecium tetraurelia]	Uncharacterised protein
L1LBZ9	55	30863	3	1	3	1	0.11	tr|L1LBZ9|BEWA_013190 Proliferating cell nuclear antigen n=3 Tax_Id=1537102 [Babesia equi strain WA]	DNA replication and repair
J9HXD3	55	71763	5	1	3	1	0.05	tr|J9HXD3|OXYTRI_07840 RING finger protein n=2 Tax_Id=94289 [Oxytricha trifallax]	Protein processing and turnover
J4D8N9	55	46363	6	1	3	1	0.07	tr|J4D8N9|TOT_030000156 RabGDI protein n=4 Tax_Id=869250 [Theileria orientalis strain Shintoku]	Cellular organisation and transport
A0A078AC31	55	26336	2	1	1	1	0.13	tr|A0A078AC31|Contig14458.g15402 Uncharacterized protein n=2 Tax_Id=5949 [Stylonychia lemnae]	Uncharacterised protein
J4DQ39	55	67927	6	2	6	2	0.1	tr|J4DQ39|TOT_040000166 Proteasome subunit n=4 Tax_Id=869250 [Theileria orientalis strain Shintoku]	Protein processing and turnover
Q5CJV0	54	65103	2	1	2	1	0.05	tr|Q5CJV0|Chro.10420 Glucosamine-fructose-6-phosphate aminotransferase n=4 Tax_Id=237895 [Cryptosporidium hominis]	Metabolism
L0B2U4	54	60108	6	2	3	1	0.05	tr|L0B2U4|BEWA_008240 Elongation factor Tu family member n=3 Tax_Id=1537102 [Babesia equi strain WA]	Translation
J4DPL1	54	19390	3	2	2	2	0.37	tr|J4DPL1|TOT_030000155 40S ribosomal protein S19 n=4 Tax_Id=869250 [Theileria orientalis strain Shintoku]	Translation
U6JY59	54	133159	3	1	2	1	0.02	tr|U6JY59|EMH_0057860 Uncharacterized protein n=3 Tax_Id=44415 [Eimeria mitis]	Uncharacterised protein
U6KN91	54	130571	9	1	1	1	0.02	tr|U6KN91|ETH_00024950 Uncharacterized protein n=3 Tax_Id=5802 [Eimeria tenella]	Uncharacterised protein
J4DNH1	54	29859	2	1	2	1	0.11	tr|J4DNH1|TOT_010000414 Uncharacterized protein n=4 Tax_Id=869250 [Theileria orientalis strain Shintoku]	Uncharacterised protein
J4DAZ1	54	15276	10	2	6	2	0.49	tr|J4DAZ1|TOT_040000634 40S ribosomal protein S24 n=4 Tax_Id=869250 [Theileria orientalis strain Shintoku]	Translation
J7M4M9	54	109102	5	1	5	1	0.03	tr|J7M4M9|TOT_040000683 Importin beta/transportin n=4 Tax_Id=869250 [Theileria orientalis strain Shintoku]	Cellular organisation and transport
W7AGD6	53	79793	8	2	3	1	0.04	tr|W7AGD6|C922_05226 Uncharacterized protein n=3 Tax_Id=1237626 [Plasmodium inui San Antonio 1]	Uncharacterised protein
L0AWR6	53	70169	11	1	2	1	0.05	tr|L0AWR6|BEWA_025470 Uncharacterized protein n=3 Tax_Id=1537102 [Babesia equi strain WA]	Uncharacterised protein
J4D6T1	53	47093	6	1	3	1	0.07	tr|J4D6T1|TOT_020000031 Aspartate aminotransferase, cytoplasmic n=4 Tax_Id=869250 [Theileria orientalis strain Shintoku]	Metabolism
Q75R34	53	21113	23	4	7	3	0.55	tr|Q75R34|ToLocg ToLocg 1 protein n=5 Tax_Id=68886 [Theileria orientalis]	Uncharacterised protein
J4D800	53	28293	2	1	2	1	0.12	tr|J4D800|TOT_020001084 Initiation factor 4E n=4 Tax_Id=869250 [Theileria orientalis strain Shintoku]	Translation
J4CCX9	53	30114	3	1	3	1	0.11	tr|J4CCX9|TOT_020000434 Uncharacterized protein n=4 Tax_Id=869250 [Theileria orientalis strain Shintoku]	Uncharacterised protein
J7MCC6	53	15406	3	1	2	1	0.22	tr|J7MCC6|TOT_040000794 60S ribosomal protein L32 n=4 Tax_Id=869250 [Theileria orientalis strain Shintoku]	Translation
A0A024X1K4	53	164263	7	1	7	1	0.02	tr|A0A024X1K4|PFMC_05115 Uncharacterized protein n=3 Tax_Id=5835 [Plasmodium falciparum (isolate Camp / Malaysia)]	Uncharacterised protein
J7M4J8	52	44413	3	1	1	1	0.07	tr|J7M4J8|TOT_010000128 Chromatin assembly factor 1 protein n=4 Tax_Id=869250 [Theileria orientalis strain Shintoku]	DNA replication and repair
J4D8S8	52	64070	1	1	1	1	0.05	tr|J4D8S8|TOT_030000241 Uncharacterized protein n=4 Tax_Id=869250 [Theileria orientalis strain Shintoku]	Uncharacterised protein
J7M4U1	52	100149	2	1	2	1	0.03	tr|J7M4U1|TOT_040000993 Uncharacterized protein n=4 Tax_Id=869250 [Theileria orientalis strain Shintoku]	Uncharacterised protein
A0A078B0E7	52	140908	1	1	1	1	0.02	tr|A0A078B0E7|Contig2601.g2797 Calpain-7 isoform x1 n=2 Tax_Id=5949 [Stylonychia lemnae]	Protein processing and turnover
J7M4N0	52	115169	2	1	2	1	0.03	tr|J7M4N0|TOT_040000688 Gamma adaptin n=4 Tax_Id=869250 [Theileria orientalis strain Shintoku]	Cellular organisation and transport
L1LF79	52	124477	2	1	2	1	0.03	tr|L1LF79|BEWA_039380 Ubiquitination-mediated degradation protein, putative n=3 Tax_Id=1537102 [Babesia equi strain WA]	Protein processing and turnover
J4CDB5	52	12531	1	1	1	1	0.27	tr|J4CDB5|TOT_030000114 Uncharacterized protein n=4 Tax_Id=869250 [Theileria orientalis strain Shintoku]	Uncharacterised protein
J4CCL0	52	37756	1	1	1	1	0.09	tr|J4CCL0|TOT_010001031 Eukaryotic translation initiation factor 3 subunit I n=4 Tax_Id=869250 [Theileria orientalis strain Shintoku]	Translation
Q4UJ23	52	386022	8	1	3	1	0.01	tr|Q4UJ23|TA09560 Putative uncharacterized protein n=4 Tax_Id=5874 [Theileria annulata]	Uncharacterised protein
A0A023B5K7	52	157338	5	1	5	1	0.02	tr|A0A023B5K7|GNI_089390 Putative transporter ATP-binding cassette domain protein n=3 Tax_Id=110365 [Gregarina niphandrodes]	Cellular organisation and transport
I7M3Y9	52	152981	5	1	1	1	0.02	tr|I7M3Y9|TTHERM_00238890 Uncharacterized protein n=2 Tax_Id=312017 [Tetrahymena thermophila (strain SB210)]	Uncharacterised protein
J4CCE5	52	24005	8	1	7	1	0.14	tr|J4CCE5|TOT_010001289 Uncharacterized protein n=4 Tax_Id=869250 [Theileria orientalis strain Shintoku]	Uncharacterised protein
J4D5P8	51	64931	2	1	2	1	0.05	tr|J4D5P8|TOT_010000567 Uncharacterized protein n=4 Tax_Id=869250 [Theileria orientalis strain Shintoku]	Uncharacterised protein
A0A061D7Q6	51	125779	3	1	3	1	0.03	tr|A0A061D7Q6|BBBOND_0200910 Peptidase_C14 domain containg protein n=2 Tax_Id=5866 [Babesia bigemina]	Transcription, regulation and signalling
I7IRI6	51	67153	3	1	2	1	0.05	tr|I7IRI6|BBM_III03040 Chromosome III, complete sequence n=3 Tax_Id=1133968 [Babesia microti strain RI]	Uncharacterised protein
J4C8Z6	51	130726	2	1	1	1	0.02	tr|J4C8Z6|TOT_040000034 Uncharacterized protein n=4 Tax_Id=869250 [Theileria orientalis strain Shintoku]	Uncharacterised protein
CON_P00760	51	25769	5	1	1	1	0.13	sp|CON_P00760|Cationic trypsin OS=Bos taurus PE=1 SV=3 Tax_Id=9913 [Bos taurus]	Contaminant
J4CD85	51	28166	2	1	2	1	0.12	tr|J4CD85|TOT_020000956 Proteasome subunit alpha type 1 n=4 Tax_Id=869250 [Theileria orientalis strain Shintoku]	Protein processing and turnover
J4C3R2	51	60284	2	1	2	1	0.05	tr|J4C3R2|TOT_030000147 T-complex protein subunit beta n=4 Tax_Id=869250 [Theileria orientalis strain Shintoku]	Protein processing and turnover
J9ISX5	51	43650	2	1	2	1	0.08	tr|J9ISX5|OXYTRI_24154 Uncharacterized protein n=2 Tax_Id=94289 [Oxytricha trifallax]	Uncharacterised protein
A0A060RTX7	50	107483	1	1	1	1	0.03	tr|A0A060RTX7|PRCDC_1037800 RESA-like protein with PHIST and DnaJ domains n=2 Tax_Id=5854 [Plasmodium reichenowi]	Protein processing and turnover
557124503	50	216971	2	1	2	1	0.01	gi|557124503|emb|CDI78100.1| hypothetical protein, conserved, partial n=2 Tax_Id=5801 [Eimeria acervulina]	Uncharacterised protein
J4C2K0	50	18856	1	1	1	1	0.18	tr|J4C2K0|TOT_010000294 Potential glutaredoxin n=4 Tax_Id=869250 [Theileria orientalis strain Shintoku]	Homeostasis
A0A024VU07	50	54500	3	1	2	1	0.06	tr|A0A024VU07|PFFCH_00352 Uncharacterized protein n=2 Tax_Id=1036724 [Plasmodium falciparum FCH/4]	Uncharacterised protein
C5K8R6	50	18541	6	1	2	1	0.18	tr|C5K8R6|Pmar_PMAR000210 Putative uncharacterized protein n=3 Tax_Id=423536 [Perkinsus marinus (strain ATCC 50983 / TXsc)]	Uncharacterised protein
J4CCF6	50	39862	3	1	2	1	0.08	tr|J4CCF6|TOT_010000766 ADP-ribosylation factor GTPase activating protein n=4 Tax_Id=869250 [Theileria orientalis strain Shintoku]	Transcription, regulation and signalling
A0EFM3	49	68399	1	1	1	1	0.05	tr|A0EFM3|GSPATT00026437001 Chromosome undetermined scaffold_93, whole genome shotgun sequence n=3 Tax_Id=5888 [Paramecium tetraurelia]	Uncharacterised protein
J4C4J1	49	21451	1	1	1	1	0.16	tr|J4C4J1|TOT_040000645 Uncharacterized protein n=4 Tax_Id=869250 [Theileria orientalis strain Shintoku]	Uncharacterised protein
J9FYG5	49	38481	1	1	1	1	0.09	tr|J9FYG5|OXYTRI_19346 Early girl n=2 Tax_Id=94289 [Oxytricha trifallax]	Protein processing and turnover
J4D6K7	49	51018	6	1	6	1	0.06	tr|J4D6K7|TOT_010001094 Aspartyl aminopeptidase n=4 Tax_Id=869250 [Theileria orientalis strain Shintoku]	Protein processing and turnover
A0A086KEA7	49	391575	3	1	3	1	0.01	tr|A0A086KEA7|TGDOM2_288960 Putative ATP-binding surface antigen n=2 Tax_Id=1130820 [Toxoplasma gondii GAB2-2007-GAL-DOM2]	Uncharacterised protein
J4C3Q2	47	44700	4	2	4	2	0.15	tr|J4C3Q2|TOT_030000900 Adenylosuccinate lyase n=4 Tax_Id=869250 [Theileria orientalis strain Shintoku]	Uncharacterised protein
XP_976590.1	48	67820	8	1	1	1	0.05	ref|XP_976590.1| hypothetical protein TTHERM_01013310 n=2 Tax_Id=5911 [Tetrahymena thermophila]	Uncharacterised protein
J4CC73	48	26081	3	1	3	1	0.13	tr|J4CC73|TOT_010000359 Uncharacterized protein n=4 Tax_Id=869250 [Theileria orientalis strain Shintoku]	Uncharacterised protein
U6K2E4	48	46597	1	1	1	1	0.07	tr|U6K2E4|EMH_0006610 Endonuclease V, putative n=3 Tax_Id=44415 [Eimeria mitis]	DNA replication and repair
A0A077XDG0	48	192529	6	1	3	1	0.02	tr|A0A077XDG0|PBANKA_110770 SET domain protein, putative n=3 Tax_Id=5823 [Plasmodium berghei (strain Anka)]	Protein processing and turnover
A0A060S0I0	47	376517	2	1	2	1	0.01	tr|A0A060S0I0|PRCDC_1145100 Uncharacterized protein n=2 Tax_Id=5854 [Plasmodium reichenowi]	Uncharacterised protein
J4DP33	47	18009	3	1	2	1	0.19	tr|J4DP33|TOT_020000276 40S ribosomal protein S11 n=4 Tax_Id=869250 [Theileria orientalis strain Shintoku]	Translation
J4C345	47	45440	2	1	2	1	0.07	tr|J4C345|TOT_020000072 Arginine N-methyltransferase n=4 Tax_Id=869250 [Theileria orientalis strain Shintoku]	Protein processing and turnover
Q7YXW5	47	30214	2	1	1	1	0.11	tr|Q7YXW5|1MB.168 Putative uncharacterized protein n=4 Tax_Id=5807 [Cryptosporidium parvum]	Uncharacterised protein
A0A023B6A1	47	177312	2	1	2	1	0.02	tr|A0A023B6A1|GNI_085590 Uncharacterized protein n=3 Tax_Id=110365 [Gregarina niphandrodes]	Uncharacterised protein
U6M4D1	47	76242	2	2	1	1	0.04	tr|U6M4D1|EMWEY_00054050 Uncharacterized protein n=3 Tax_Id=5804 [Eimeria maxima]	Uncharacterised protein
A0A023B243	47	59569	4	1	2	1	0.05	tr|A0A023B243|GNI_125720 Uncharacterized protein n=3 Tax_Id=110365 [Gregarina niphandrodes]	Uncharacterised protein
J4C927	46	71244	5	1	5	1	0.05	tr|J4C927|TOT_040000923 Uncharacterized protein n=4 Tax_Id=869250 [Theileria orientalis strain Shintoku]	Uncharacterised protein
L1LBJ7	46	87526	20	1	4	1	0.04	tr|L1LBJ7|BEWA_050160 Translation initiation factor IF-2, putative n=3 Tax_Id=1537102 [Babesia equi strain WA]	Translation
A0A077XIG0	45	33181	1	1	1	1	0.1	tr|A0A077XIG0|PBANKA_131910 Hemolysin, putative n=3 Tax_Id=5823 [Plasmodium berghei (strain Anka)]	Host cell attachment and interaction
J4CCP7	45	23158	1	1	1	1	0.14	tr|J4CCP7|TOT_020000033 Peptidyl-prolyl cis-trans isomerase n=4 Tax_Id=869250 [Theileria orientalis strain Shintoku]	Protein processing and turnover
J4DPK1	45	22531	1	1	1	1	0.15	tr|J4DPK1|TOT_030000106 Nucleoside diphosphate hydrolase n=4 Tax_Id=869250 [Theileria orientalis strain Shintoku]	Metabolism
C5LG41	45	29441	5	1	3	1	0.11	tr|C5LG41|Pmar_PMAR021801 Putative uncharacterized protein n=3 Tax_Id=423536 [Perkinsus marinus (strain ATCC 50983 / TXsc)]	Uncharacterised protein
J4DQE1	44	34863	1	1	1	1	0.09	tr|J4DQE1|TOT_040000663 26S proteasome regulatory subunit n=4 Tax_Id=869250 [Theileria orientalis strain Shintoku]	Protein processing and turnover
A0A078AES7	44	110065	1	1	1	1	0.03	tr|A0A078AES7|Contig657.g727 Calpain-like protease n=2 Tax_Id=5949 [Stylonychia lemnae]	Transcription, regulation and signalling
EfaB_MINUS_20412.g1812	44	81587	1	1	1	1	0.04	eupathdb|EfaB_MINUS_20412.g1812|unspecified product n=1 Tax_Id=84963 [Eimeria falciformis Bayer Haberkorn 1970]	Uncharacterised protein
A4VEL5	44	65837	1	1	1	1	0.05	tr|A4VEL5|TTHERM_00375098 Sas10/Utp3/C1D family protein n=3 Tax_Id=312017 [Tetrahymena thermophila (strain SB210)]	Cellular organisation and transport
K6VHP5	44	74430	3	1	2	1	0.04	tr|K6VHP5|PCYB_143150 Uncharacterized protein n=4 Tax_Id=1120755 [Plasmodium cynomolgi strain B]	Uncharacterised protein
J9G9R4	44	138150	6	1	4	1	0.02	tr|J9G9R4|OXYTRI_06339 Uncharacterized protein n=2 Tax_Id=94289 [Oxytricha trifallax]	Uncharacterised protein
J4CCS6	44	23667	1	1	1	1	0.14	tr|J4CCS6|TOT_020000179 Glutaredoxin-like protein grla n=4 Tax_Id=869250 [Theileria orientalis strain Shintoku]	Homeostasis
U6M2L1	44	68411	2	1	2	1	0.05	tr|U6M2L1|EMWEY_00021310 Uncharacterized protein n=3 Tax_Id=5804 [Eimeria maxima]	Uncharacterised protein
J4DPR0	44	36503	1	1	1	1	0.09	tr|J4DPR0|TOT_030000919 Uncharacterized protein n=4 Tax_Id=869250 [Theileria orientalis strain Shintoku]	Uncharacterised protein
A0A078AT16	43	30451	1	1	1	1	0.11	tr|A0A078AT16|Contig16719.g17813 Uncharacterized protein n=2 Tax_Id=5949 [Stylonychia lemnae]	Uncharacterised protein
A0A078AAJ1	43	217036	14	1	1	1	0.01	tr|A0A078AAJ1|Contig9579.g10254 Lissencephaly type-1-like motif-containing protein n=2 Tax_Id=5949 [Stylonychia lemnae]	Cellular organisation and transport
A0D767	43	183828	3	1	3	1	0.02	tr|A0D767|GSPATT00001925001 Chromosome undetermined scaffold_4, whole genome shotgun sequence n=3 Tax_Id=5888 [Paramecium tetraurelia]	Uncharacterised protein
J4C3S8	43	13495	5	1	4	1	0.25	tr|J4C3S8|TOT_030000227 60S ribosomal protein L35a n=4 Tax_Id=869250 [Theileria orientalis strain Shintoku]	Translation
A0A078AKT0	43	63048	4	1	1	1	0.05	tr|A0A078AKT0|Contig150.g179 Uncharacterized protein n=2 Tax_Id=5949 [Stylonychia lemnae]	Uncharacterised protein
XP_002775477.1	43	34698	7	1	1	1	0.1	ref|XP_002775477.1| hexose transporter, putative, partial n=2 Tax_Id=423536 [Perkinsus marinus ATCC 50983]	Cellular organisation and transport
Q4N7D6	43	17223	2	1	2	1	0.2	tr|Q4N7D6|TP01_0884 Eukaryotic translation initiation factor 5A, putative n=4 Tax_Id=5875 [Theileria parva]	Translation
A0A086KEM0	43	91742	2	1	2	1	0.04	tr|A0A086KEM0|TGP89_225480 Uncharacterized protein n=2 Tax_Id=943119 [Toxoplasma gondii p89]	Uncharacterised protein
A0ECP9	43	60948	1	1	1	1	0.05	tr|A0ECP9|GSPATT00003935001 Chromosome undetermined scaffold_9, whole genome shotgun sequence n=3 Tax_Id=5888 [Paramecium tetraurelia]	Uncharacterised protein
J7M864	42	76433	2	1	2	1	0.04	tr|J7M864|TOT_010001210 Long-chain-fatty-acid--CoA ligase n=4 Tax_Id=869250 [Theileria orientalis strain Shintoku]	Metabolism
K6UPB0	42	150594	2	1	2	1	0.02	tr|K6UPB0|PCYB_011420 Uncharacterized protein n=4 Tax_Id=1120755 [Plasmodium cynomolgi strain B]	Uncharacterised protein
Q4N924	41	46968	1	1	1	1	0.07	tr|Q4N924|TP01_0290 26S proteasome subunit, putative n=4 Tax_Id=5875 [Theileria parva]	Protein processing and turnover
J4C3E5	41	39468	10	1	7	1	0.08	tr|J4C3E5|TOT_020001069 60S ribosomal protein L4/L1 n=4 Tax_Id=869250 [Theileria orientalis strain Shintoku]	Translation
J4DNS3	41	45407	5	1	5	1	0.07	tr|J4DNS3|TOT_010000914 Phosphoglycerate kinase n=4 Tax_Id=869250 [Theileria orientalis strain Shintoku]	Metabolism
J4DPB4	41	21556	4	1	3	1	0.16	tr|J4DPB4|TOT_020000666 60S ribosomal protein L17 n=4 Tax_Id=869250 [Theileria orientalis strain Shintoku]	Translation
U6K4E2	41	47672	3	1	2	1	0.07	tr|U6K4E2|EMH_0075880 Uncharacterized protein n=3 Tax_Id=44415 [Eimeria mitis]	Uncharacterised protein
Q4N293	40	27888	1	1	1	1	0.12	tr|Q4N293|TP04_0464 Triosephosphate isomerase n=4 Tax_Id=5875 [Theileria parva]	Metabolism
U6GAW6	40	90317	3	1	2	1	0.04	tr|U6GAW6|EPH_0024240 Uncharacterized protein n=3 Tax_Id=51316 [Eimeria praecox]	Uncharacterised protein
Q4N4H9	40	48365	3	1	2	1	0.07	tr|Q4N4H9|TP02_0661 Uncharacterized protein n=4 Tax_Id=5875 [Theileria parva]	Uncharacterised protein
J9HSK4	40	62045	1	1	1	1	0.05	tr|J9HSK4|OXYTRI_12206 Uncharacterized protein n=2 Tax_Id=94289 [Oxytricha trifallax]	Uncharacterised protein
Q5CHP0	40	226882	4	2	3	1	0.01	tr|Q5CHP0|Chro.20253 Uncharacterized protein n=4 Tax_Id=237895 [Cryptosporidium hominis]	Uncharacterised protein
145843742	40	39493	1	1	1	1	0.08	gi|145843742|gb|ABP96885.1| alpha-tubulin Tax_Id=346242 [Protocruzia contrax]	Cellular organisation and transport
J9HYB1	39	93712	2	1	1	1	0.03	tr|J9HYB1|OXYTRI_09339 CMGC family protein kinase n=2 Tax_Id=94289 [Oxytricha trifallax]	Transcription, regulation and signalling
A0E0H3	39	63162	2	1	2	1	0.05	tr|A0E0H3|GSPATT00021958001 Chromosome undetermined scaffold_71, whole genome shotgun sequence n=3 Tax_Id=5888 [Paramecium tetraurelia]	Uncharacterised protein
U6LIM4	39	91610	3	1	2	1	0.04	tr|U6LIM4|EBH_0030320 KLTH0F01518p, related n=3 Tax_Id=51314 [Eimeria brunetti]	Uncharacterised protein
Q4UJ04	39	195977	4	1	3	1	0.02	tr|Q4UJ04|TA16660 Putative uncharacterized protein n=4 Tax_Id=5874 [Theileria annulata]	Uncharacterised protein
A7AMM6	39	78655	3	1	3	1	0.04	tr|A7AMM6|BBOV_III002440 DnaJ domain containing protein n=4 Tax_Id=5865 [Babesia bovis]	Protein processing and turnover
J4DQC5	39	30150	4	1	4	1	0.11	tr|J4DQC5|TOT_040000965 Splicing factor n=4 Tax_Id=869250 [Theileria orientalis strain Shintoku]	Transcription, regulation and signalling
J4C7X3	39	16523	6	1	4	1	0.2	tr|J4C7X3|TOT_020000059 60S ribosomal protein L27 n=4 Tax_Id=869250 [Theileria orientalis strain Shintoku]	Translation
A0A074TC99	39	244203	8	1	5	1	0.01	tr|A0A074TC99|HHA_268240 Uncharacterized protein n=3 Tax_Id=99158 [Hammondia hammondi]	Uncharacterised protein
A0BEA4	39	12340	4	1	2	1	0.28	tr|A0BEA4|GSPATT00027904001 Chromosome undetermined scaffold_101, whole genome shotgun sequence n=3 Tax_Id=5888 [Paramecium tetraurelia]	Uncharacterised protein
A0D4A2	39	137698	2	1	2	1	0.02	tr|A0D4A2|GSPATT00013335001 Chromosome undetermined scaffold_37, whole genome shotgun sequence n=3 Tax_Id=5888 [Paramecium tetraurelia]	Uncharacterised protein
J9J624	38	127948	2	1	2	1	0.03	tr|J9J624|OXYTRI_17036 TBC1 domain family member 2B n=2 Tax_Id=94289 [Oxytricha trifallax]	Transcription, regulation and signalling
EfaB_PLUS_17907.g1545	38	857260	27	1	9	1	0.03	eupathdb|EfaB_PLUS_17907.g1545|unspecified product n=1 Tax_Id=84963 [Eimeria falciformis Bayer Haberkorn 1970]	Uncharacterised protein
A0A074T158	38	79602	5	1	2	1	0.04	tr|A0A074T158|HHA_285220 CAP-Gly domain-containing protein n=3 Tax_Id=99158 [Hammondia hammondi]	Cellular organisation and transport
W7A682	38	43511	2	1	1	1	0.08	tr|W7A682|C922_05050 Uncharacterized protein n=3 Tax_Id=1237626 [Plasmodium inui San Antonio 1]	Uncharacterised protein
A0EGF6	38	41320	3	1	1	1	0.08	tr|A0EGF6|GSPATT00026721001 Chromosome undetermined scaffold_95, whole genome shotgun sequence n=3 Tax_Id=5888 [Paramecium tetraurelia]	Uncharacterised protein
A0A086QPF2	38	144463	6	1	3	1	0.02	tr|A0A086QPF2|TGMAS_221370 Uncharacterized protein n=2 Tax_Id=943118 [Toxoplasma gondii MAS]	Uncharacterised protein
A0A077TV83	38	707921	8	1	7	1	0.02	tr|A0A077TV83|PCHAS_144430 Cyclin-related protein, putative n=3 Tax_Id=31271 [Plasmodium chabaudi chabaudi]	Transcription, regulation and signalling
A0CZN1	37	75004	1	1	1	1	0.04	tr|A0CZN1|GSPATT00011821001 Chromosome undetermined scaffold_32, whole genome shotgun sequence n=3 Tax_Id=5888 [Paramecium tetraurelia]	Uncharacterised protein
J4CD27	36	16904	3	1	1	1	0.2	tr|J4CD27|TOT_020000669 Calmodulin n=4 Tax_Id=869250 [Theileria orientalis strain Shintoku]	Transcription, regulation and signalling
33235676	36	15703	2	1	2	1	0.22	gi|33235676|dbj|BAC80195.1| cytosol-type hsp70 n=1 Tax_Id=44030 [Paramecium multimicronucleatum]	Homeostasis
A0A024VA36	36	77406	3	1	2	1	0.04	tr|A0A024VA36|PFFVO_01472 Uncharacterized protein n=9 Tax_Id=1036723 [Plasmodium falciparum Vietnam Oak-Knoll (FVO)]	Uncharacterised protein
U6KGV7	36	193623	3	1	2	1	0.02	tr|U6KGV7|ETH_00013210 Uncharacterized protein n=3 Tax_Id=5802 [Eimeria tenella]	Uncharacterised protein
J4CC67	35	35017	1	1	1	1	0.09	tr|J4CC67|TOT_010000329 Gmp reductase n=4 Tax_Id=869250 [Theileria orientalis strain Shintoku]	Metabolism
J4DPA1	35	46999	3	1	3	1	0.07	tr|J4DPA1|TOT_020000603 ATP-dependent RNA helicase n=4 Tax_Id=869250 [Theileria orientalis strain Shintoku]	Transcription, regulation and signalling
A0A074SRI9	35	91879	1	1	1	1	0.04	tr|A0A074SRI9|HHA_263480 Sodium/hydrogen exchanger 3 protein n=3 Tax_Id=99158 [Hammondia hammondi]	Cellular organisation and transport
U6KHT3	35	139655	4	1	4	1	0.02	tr|U6KHT3|ETH_00001520 Uncharacterized protein n=3 Tax_Id=5802 [Eimeria tenella]	Uncharacterised protein
J4C2W3	34	76276	2	2	1	1	0.04	tr|J4C2W3|TOT_010000847 Uncharacterized protein n=4 Tax_Id=869250 [Theileria orientalis strain Shintoku]	Uncharacterised protein
J4C8S5	34	47776	2	1	2	1	0.07	tr|J4C8S5|TOT_030000561 Cysteine protease TacP n=4 Tax_Id=869250 [Theileria orientalis strain Shintoku]	Protein processing and turnover
Q5CNL9	34	98147	2	1	2	1	0.03	tr|Q5CNL9|Chro.10140 DNA repair protein RAD54-like n=4 Tax_Id=237895 [Cryptosporidium hominis]	DNA replication and repair
F0VJ34	34	106483	5	1	3	1	0.03	tr|F0VJ34|NCLIV_035270 Putative zinc carboxypeptidase n=4 Tax_Id=572307 [Neospora caninum (strain Liverpool)]	Protein processing and turnover
557737413	33	1709984	18	1	17	1	0.05	gi|557737413|gb|ESS33379.1| HECT-domain (ubiquitin-transferase) domain-containing protein, partial n=2 Tax_Id=432359 [Toxoplasma gondii VEG]	Protein processing and turnover
XP_004024238.1	33	45623	2	1	2	1	0.07	ref|XP_004024238.1| multicopy suppressor of ira1, putative, partial n=2 Tax_Id=5932 [Ichthyophthirius multifiliis]	DNA replication and repair
A0A077TPQ5	33	200108	3	1	3	1	0.02	tr|A0A077TPQ5|PCHAS_135590 Uncharacterized protein n=3 Tax_Id=31271 [Plasmodium chabaudi chabaudi]	Uncharacterised protein
G0QNF8	32	15512	1	1	1	1	0.22	tr|G0QNF8|IMG5_058020 Protein kinase domain protein n=3 Tax_Id=857967 [Ichthyophthirius multifiliis (strain G5)]	Transcription, regulation and signalling
A0A078AMB3	32	140189	3	1	3	1	0.02	tr|A0A078AMB3|Contig8035.g8565 Uncharacterized protein n=2 Tax_Id=5949 [Stylonychia lemnae]	Uncharacterised protein
I6R717	32	325127	9	1	3	1	0.01	tr|I6R717|RBP3 Reticulocyte-binding protein 3 n=2 Tax_Id=5827 [Plasmodium cynomolgi]	Host cell attachment and interaction
A0A074SSJ2	30	1287220	8	1	8	1	0.02	tr|A0A074SSJ2|HHA_209000 HECT-domain (Ubiquitin-transferase) domain-containing protein n=3 Tax_Id=99158 [Hammondia hammondi]	Protein processing and turnover
A5KE25	29	187060	7	1	7	1	0.02	tr|A5KE25|PVX_111385 Uncharacterized protein n=4 Tax_Id=126793 [Plasmodium vivax (strain Salvador I)]	Uncharacterised protein
F0VF96	28	170486	2	1	2	1	0.02	tr|F0VF96|NCLIV_021790 Putative uncharacterized protein n=4 Tax_Id=572307 [Neospora caninum (strain Liverpool)]	Uncharacterised protein
U6GQV8	28	39979	1	1	1	1	0.08	tr|U6GQV8|EAH_00062430 Uncharacterized protein n=3 Tax_Id=5801 [Eimeria acervulina]	Uncharacterised protein
L1LE16	23	41258	9	1	2	1	0.08	tr|L1LE16|BEWA_037130 Uncharacterized protein n=3 Tax_Id=1537102 [Babesia equi strain WA]	Uncharacterised protein
