# Supplementary material for: Characterisation of the Theileria orientalis Piroplasm Proteome across Three Common Genotypes
Source: Pathogens. 2022 Sep 30;11(10):1135. doi: 10.3390/pathogens11101135 (PMC9610513; doi:10.3390/pathogens11101135)
Supplement: Supplementary file 1 [file pathogens-11-01135-s001.zip › Table S3.xlsx]

## Sheet: Sheet1
Uniprot ID	Locus tag	Expressed in genotype	emPAI (T. orientalis Ikeda)	Gene present in genome	Part of Orthofinder orthogroup OG0000052	EggNOG ID	Other comments
Q75R34	TOT_030000643	Ikeda	52.06	Ikeda, Buffeli	Yes	ENOG503KE5M	Signal peptide
J4DPH8	TOT_020001109	Ikeda	10.83	Ikeda, Buffeli	Yes	ENOG503KE5M	TMdomain
J4CCC5	TOT_010000613	Ikeda, Buffeli	5.06	Ikeda, Chitose, Buffeli	Yes	ENOG503KDN3	Signal peptide
J7M4S6	TOT_040000842	Ikeda	4.93	Ikeda, Buffeli	Yes	ENOG503KDN3	Signal peptide
J4C2Q4	TOT_010000558	Ikeda, Buffeli	3.36	Ikeda, Chitose, Buffeli	Yes	ENOG503KDN3	Signal peptide
J4C9B1	TOT_040000598	Ikeda	3.06	Ikeda, Buffeli	Yes	ENOG503KE5M	Signal peptide
J4D7C0	TOT_020000353	Ikeda	1.88	Ikeda, Buffeli	Yes	ENOG503KE5M	Signal peptide
J4DNX9	TOT_020000012	Ikeda	1.24	Ikeda, Buffeli	No	ENOG503KDN3	Signal peptide
